# Supplementary material for: Doing nothing and what it looks like: inactivity in fattening cattle
Source: PeerJ journal article supplement (doi:10.7717/peerj.9395), 2020-07-21
Supplement: peerj-42249-Hintze_et_al_Figure_SI1.pdf [file peerj-42249-Hintze_et_al_Figure_SI1.pdf]

## INTENSIVE

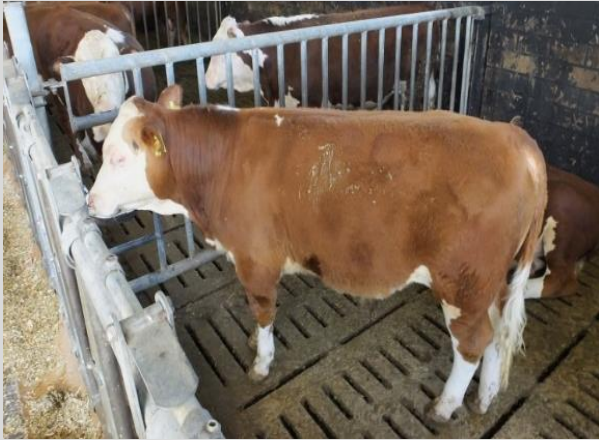

## SEMI

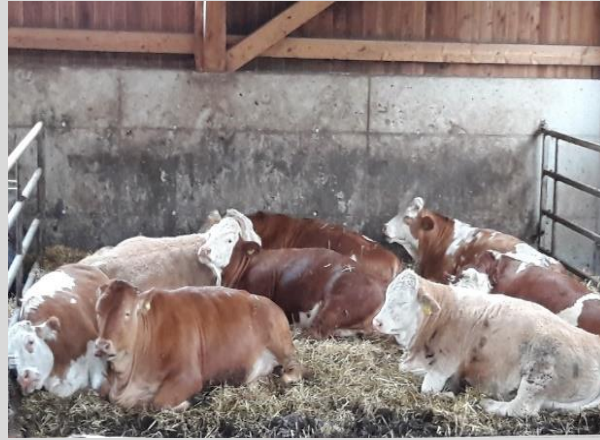

## PASTURE

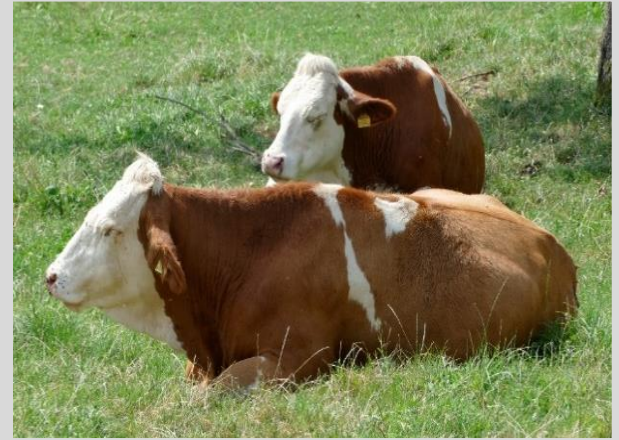

**Figure 1. Pictures illustrating the three husbandry systems.** INTENSIVE: heifers in pens with fully-slatted floor. SEMI: heifers in a straw-bedded lying area. PASTURE: heifers on pasture.
