# Supplementary material for: Doing nothing and what it looks like: inactivity in fattening cattle
Source: PeerJ. 2020 Jul 21;8:e9395. doi: 10.7717/peerj.9395 (PMC7512136; doi:10.7717/peerj.9395)
Supplement: Supplemental Information 7 [file peerj-08-9395-s007.xlsx]

## Sheet: Sheet1
Husbandry system	Farm	Farm Visit	Morning/Afternoon	Date	Animal	Start time	End time	Basic body postures	Lying postures	Head	Ears	Eyes	Tail
PASTURE	1	1	afternoon	2018_07_24	1	12:39:03:17	12:39:04:16	Standing		Head up	Ears backwards	Eyes open	Tail hanging
PASTURE	1	1	afternoon	2018_07_24	1	12:39:04:17	12:39:05:16	Standing		Head up	Ears backwards	Eyes open	Tail hanging
PASTURE	1	1	afternoon	2018_07_24	1	12:39:05:17	12:39:06:16	Standing		Head up	Ears backwards	Eyes open	Tail hanging
PASTURE	1	1	afternoon	2018_07_24	1	12:39:06:17	12:39:07:16	Standing		Head up	Ears backwards	Eyes open	Tail hanging
PASTURE	1	1	afternoon	2018_07_24	1	12:39:07:17	12:39:08:16	Standing		Head up	Ears backwards	Eyes open	Tail hanging
PASTURE	1	1	afternoon	2018_07_24	1	12:39:08:17	12:39:09:16	Standing		Head up	Ears backwards	Eyes open	Tail hanging
PASTURE	1	1	afternoon	2018_07_24	1	12:39:09:17	12:39:10:16	Standing		Head up	Ears backwards	Eyes open	Tail hanging
PASTURE	1	1	afternoon	2018_07_24	1	12:39:10:17	12:39:11:16	Standing		Head up	Ears backwards	Eyes open	Tail hanging
PASTURE	1	1	afternoon	2018_07_24	1	12:39:11:17	12:39:12:16	Standing		Head up	Ears backwards	Eyes open	Tail hanging
PASTURE	1	1	afternoon	2018_07_24	1	12:39:12:17	12:39:13:16	Standing		Head up	Ears backwards	Eyes open	Tail in motion
PASTURE	1	1	afternoon	2018_07_24	1	12:39:13:17	12:39:14:16	Standing		Head up	Ears backwards	Eyes open	Tail in motion
PASTURE	1	1	afternoon	2018_07_24	1	12:39:14:17	12:39:15:16	Standing		Head up	Ears backwards	Eyes open	Tail in motion
PASTURE	1	1	afternoon	2018_07_24	1	12:39:15:17	12:39:16:16	Standing		Head up	Ears backwards	Eyes open	Tail in motion
PASTURE	1	1	afternoon	2018_07_24	1	12:39:16:17	12:39:17:16	Standing		Head up	Ears backwards	Eyes open	Tail in motion
PASTURE	1	1	afternoon	2018_07_24	1	12:39:17:17	12:39:18:16	Standing		Head up	Ears backwards	Eyes open	Tail in motion
PASTURE	1	1	afternoon	2018_07_24	1	12:39:18:17	12:39:19:16	Standing		Head up	Ears backwards	Eyes open	Tail in motion
PASTURE	1	1	afternoon	2018_07_24	1	12:39:19:17	12:39:20:16	Standing		Head up	Ears backwards	Eyes open	Tail in motion
PASTURE	1	1	afternoon	2018_07_24	1	12:39:20:17	12:39:21:16	Standing		Head up	Ears backwards	Eyes open	Tail in motion
PASTURE	1	1	afternoon	2018_07_24	1	12:39:21:17	12:39:22:16	Standing		Head up	Ears backwards	Eyes open	Tail in motion
PASTURE	1	1	afternoon	2018_07_24	1	12:39:22:17	12:39:23:16	Standing		Head up	Ears backwards	Eyes open	Tail in motion
PASTURE	1	1	afternoon	2018_07_24	1	12:39:23:17	12:39:24:16	Standing		Head up	Ears backwards	Eyes open	Tail in motion
PASTURE	1	1	afternoon	2018_07_24	1	12:39:24:17	12:39:25:16	Standing		Head up	Ears backwards	Eyes open	Tail in motion
PASTURE	1	1	afternoon	2018_07_24	1	12:39:25:17	12:39:26:16	Standing		Head up	Ears backwards	Eyes open	Tail in motion
PASTURE	1	1	afternoon	2018_07_24	1	12:39:26:17	12:39:27:16	Standing		Head up	Ears backwards	Eyes open	Tail in motion
PASTURE	1	1	afternoon	2018_07_24	1	12:39:27:17	12:39:28:16	Standing		Head up	Ears backwards	Eyes open	Tail in motion
PASTURE	1	1	afternoon	2018_07_24	1	12:39:28:17	12:39:29:16	Standing		Head up	Ears backwards	Eyes open	Tail in motion
PASTURE	1	1	afternoon	2018_07_24	1	12:39:29:17	12:39:30:16	Standing		Head up	Ears backwards	Eyes open	Tail in motion
PASTURE	1	1	afternoon	2018_07_24	1	12:39:30:17	12:39:31:16	Standing		Head up	Ears backwards	Eyes open	Tail in motion
PASTURE	1	1	afternoon	2018_07_24	1	12:39:31:17	12:39:32:16	Standing		Head down	Ears backwards	Eyes open	Tail in motion
PASTURE	1	1	afternoon	2018_07_24	1	12:39:32:17	12:39:33:16	Standing		Head down	Ears backwards	Eyes open	Tail in motion
PASTURE	1	1	afternoon	2018_07_24	1	12:39:33:17	12:39:34:16	Standing		Head down	Ears backwards	Eyes open	Tail in motion
PASTURE	1	1	afternoon	2018_07_24	1	12:39:34:17	12:39:35:16	Standing		Head down	Ears backwards	Eyes open	Tail in motion
PASTURE	1	1	afternoon	2018_07_24	1	12:39:35:17	12:39:36:16	Standing		Head down	Ears backwards	Eyes open	Tail in motion
PASTURE	1	1	afternoon	2018_07_24	1	12:39:36:17	12:39:37:16	Standing		Head down	Ears backwards	Eyes open	Tail in motion
PASTURE	1	1	afternoon	2018_07_24	1	12:39:37:17	12:39:38:16	Standing		Head down	Ears backwards	Eyes open	Tail in motion
PASTURE	1	1	afternoon	2018_07_24	1	12:39:38:17	12:39:39:16	Standing		Head down	Ears backwards	Eyes open	Tail in motion
PASTURE	1	1	afternoon	2018_07_24	1	12:39:39:17	12:39:40:16	Standing		Head down	Ears backwards	Eyes open	Tail in motion
PASTURE	1	1	afternoon	2018_07_24	1	12:39:40:17	12:39:41:16	Standing		Head down	Ears backwards	Eyes open	Tail in motion
PASTURE	1	1	afternoon	2018_07_24	1	12:39:41:17	12:39:42:16	Standing		Head down	Ears backwards	Eyes open	Tail in motion
PASTURE	1	1	afternoon	2018_07_24	1	12:39:42:17	12:39:43:16	Standing		Head down	Ears backwards	Eyes open	Tail in motion
PASTURE	1	1	afternoon	2018_07_24	1	12:39:43:17	12:39:44:16	Standing		Head down	Ears backwards	Eyes open	Tail in motion
PASTURE	1	1	afternoon	2018_07_24	1	12:39:44:17	12:39:45:16	Standing		Head down	Ears backwards	Eyes open	Tail in motion
PASTURE	1	1	afternoon	2018_07_24	1	12:39:45:17	12:39:46:16	Standing		Head down	Ears backwards	Eyes open	Tail in motion
PASTURE	1	1	afternoon	2018_07_24	1	12:39:46:17	12:39:47:16	Standing		Head down	Ears backwards	Eyes open	Tail in motion
PASTURE	1	1	afternoon	2018_07_24	1	12:39:47:17	12:39:48:16	Standing		Head down	Ears backwards	Eyes open	Tail in motion
PASTURE	1	1	afternoon	2018_07_24	1	12:39:48:17	12:39:49:16	Standing		Head down	Ears backwards	Eyes open	Tail in motion
PASTURE	1	1	afternoon	2018_07_24	1	12:39:49:17	12:39:50:16	Standing		Head down	Ears backwards	Eyes open	Tail in motion
PASTURE	1	1	afternoon	2018_07_24	1	12:39:50:17	12:39:51:16	Standing		Head down	Ears backwards	Eyes open	Tail in motion
PASTURE	1	1	afternoon	2018_07_24	1	12:39:51:17	12:39:52:16	Standing		Head down	Ears forwards	Eyes open	Tail in motion
PASTURE	1	1	afternoon	2018_07_24	1	12:39:52:17	12:39:53:16	Standing		Head down	Ears forwards	Eyes open	Tail in motion
PASTURE	1	1	afternoon	2018_07_24	1	12:39:53:17	12:39:54:16	Standing		Head down	Ears forwards	Eyes open	Tail in motion
PASTURE	1	1	afternoon	2018_07_24	1	12:39:54:17	12:39:55:16	Standing		Head down	Ears forwards	Eyes open	Tail in motion
PASTURE	1	1	afternoon	2018_07_24	1	12:39:55:17	12:39:56:16	Standing		Head down	Ears forwards	Eyes open	Tail in motion
PASTURE	1	1	afternoon	2018_07_24	1	12:39:56:17	12:39:57:16	Standing		Head down	Ears forwards	Eyes open	Tail in motion
PASTURE	1	1	afternoon	2018_07_24	1	12:39:57:17	12:39:58:16	Standing		Head down	Ears forwards	Eyes open	Tail in motion
PASTURE	1	1	afternoon	2018_07_24	1	12:39:58:17	12:39:59:16	Standing		Head down	Ears forwards	Eyes open	Tail in motion
PASTURE	1	1	afternoon	2018_07_24	1	12:39:59:17	12:40:00:16	Standing		Head down	Ears forwards	Eyes open	Tail in motion
PASTURE	1	1	afternoon	2018_07_24	1	12:40:00:17	12:40:01:16	Standing		Head down	Ears forwards	Eyes open	Tail in motion
PASTURE	1	1	afternoon	2018_07_24	1	12:40:01:17	12:40:02:16	Standing		Head down	Ears forwards	Eyes open	Tail in motion
PASTURE	1	1	afternoon	2018_07_24	1	12:40:02:17	12:40:03:16	Standing		Head down	Ears forwards	Eyes open	Tail in motion
PASTURE	1	1	afternoon	2018_07_24	1	12:40:03:17	12:40:04:16	Standing		Head down	Ears forwards	Eyes open	Tail in motion
PASTURE	1	1	afternoon	2018_07_24	1	12:40:04:17	12:40:05:16	Standing		Head down	Ears forwards	Eyes open	Tail in motion
PASTURE	1	1	afternoon	2018_07_24	1	12:40:05:17	12:40:06:16	Standing		Head down	Ears forwards	Eyes open	Tail in motion
PASTURE	1	1	afternoon	2018_07_24	1	12:40:06:17	12:40:07:16	Standing		Head down	Ears forwards	Eyes open	Tail in motion
PASTURE	1	1	afternoon	2018_07_24	1	12:40:07:17	12:40:08:16	Standing		Head down	Ears forwards	Eyes open	Tail in motion
PASTURE	1	1	afternoon	2018_07_24	1	12:40:08:17	12:40:09:16	Standing		Head down	Ears forwards	Eyes open	Tail in motion
PASTURE	1	1	afternoon	2018_07_24	1	12:40:09:17	12:40:10:16	Standing		Head down	Ears forwards	Eyes open	Tail in motion
PASTURE	1	1	afternoon	2018_07_24	1	12:40:10:17	12:40:11:16	Standing		Head down	Ears forwards	Eyes open	Tail in motion
PASTURE	1	1	afternoon	2018_07_24	1	12:40:11:17	12:40:12:16	Standing		Head down	Ears forwards	Eyes open	Tail in motion
PASTURE	1	1	afternoon	2018_07_24	1	12:40:12:17	12:40:13:16	Standing		Head down	Ears forwards	Eyes open	Tail in motion
PASTURE	1	1	afternoon	2018_07_24	1	12:40:13:17	12:40:14:16	Standing		Head down	Ears forwards	Eyes open	Tail in motion
PASTURE	1	1	afternoon	2018_07_24	1	12:40:14:17	12:40:15:16	Standing		Head down	Ears forwards	Eyes open	Tail in motion
PASTURE	1	1	afternoon	2018_07_24	1	12:40:15:17	12:40:16:16	Standing		Head down	Ears backwards	Eyes open	Tail in motion
PASTURE	1	1	afternoon	2018_07_24	1	12:40:16:17	12:40:17:16	Standing		Head down	Ears backwards	Eyes open	Tail in motion
PASTURE	1	1	afternoon	2018_07_24	1	12:40:17:17	12:40:18:16	Standing		Head down	Ears backwards	Eyes open	Tail in motion
PASTURE	1	1	afternoon	2018_07_24	1	12:40:18:17	12:40:19:16	Standing		Head down	Ears backwards	Eyes open	Tail in motion
PASTURE	1	1	afternoon	2018_07_24	1	12:40:19:17	12:40:20:16	Standing		Head down	Ears backwards	Eyes open	Tail in motion
PASTURE	1	1	afternoon	2018_07_24	1	12:40:20:17	12:40:21:16	Standing		Head down	Ears backwards	Eyes open	Tail in motion
PASTURE	1	1	afternoon	2018_07_24	1	12:40:21:17	12:40:22:16	Standing		Head down	Ears backwards	Eyes open	Tail in motion
PASTURE	1	1	afternoon	2018_07_24	1	12:40:22:17	12:40:23:16	Standing		Head down	Ears backwards	Eyes open	Tail in motion
PASTURE	1	1	afternoon	2018_07_24	1	12:40:23:17	12:40:24:16	Standing		Head down	Ears backwards	Eyes open	Tail in motion
PASTURE	1	1	afternoon	2018_07_24	1	12:40:24:17	12:40:25:16	Standing		Head down	Ears backwards	Eyes open	Tail in motion
PASTURE	1	1	afternoon	2018_07_24	1	12:40:25:17	12:40:26:16	Standing		Head down	Ears backwards	Eyes open	Tail in motion
PASTURE	1	1	afternoon	2018_07_24	1	12:40:26:17	12:40:27:16	Standing		Head down	Ears backwards	Eyes open	Tail in motion
PASTURE	1	1	afternoon	2018_07_24	1	12:40:27:17	12:40:28:16	Standing		Head down	Ears backwards	Eyes open	Tail in motion
PASTURE	1	1	afternoon	2018_07_24	1	12:40:28:17	12:40:29:16	Standing		Head down	Ears backwards	Eyes open	Tail in motion
PASTURE	1	1	afternoon	2018_07_24	1	12:40:29:17	12:40:30:16	Standing		Head down	Ears backwards	Eyes open	Tail in motion
PASTURE	1	1	afternoon	2018_07_24	1	12:40:30:17	12:40:31:16	Standing		Head down	Ears backwards	Eyes open	Tail in motion
PASTURE	1	1	afternoon	2018_07_24	1	12:40:31:17	12:40:32:16	Standing		Head down	Ears backwards	Eyes open	Tail in motion
PASTURE	1	1	afternoon	2018_07_24	1	12:40:32:17	12:40:33:16	Standing		Head up	Ears backwards	Eyes open	Tail in motion
PASTURE	1	1	afternoon	2018_07_24	1	12:40:33:17	12:40:34:16	Standing		Head up	Ears backwards	Eyes open	Tail in motion
PASTURE	1	1	afternoon	2018_07_24	1	12:40:34:17	12:40:35:16	Standing		Head up	Ears backwards	Eyes open	Tail in motion
PASTURE	1	1	afternoon	2018_07_24	1	12:40:35:17	12:40:36:16	Standing		Head up	Ears backwards	Eyes open	Tail in motion
PASTURE	1	1	afternoon	2018_07_24	1	12:40:36:17	12:40:37:16	Standing		Head up	Ears backwards	Eyes open	Tail in motion
PASTURE	1	1	afternoon	2018_07_24	1	12:40:37:17	12:40:38:16	Standing		Head up	Ears backwards	Eyes open	Tail in motion
PASTURE	1	1	afternoon	2018_07_24	1	12:40:38:17	12:40:39:16	Standing		Head up	Ears backwards	Eyes open	Tail in motion
PASTURE	1	1	afternoon	2018_07_24	1	12:40:39:17	12:40:40:16	Standing		Head up	Ears backwards	Eyes open	Tail in motion
PASTURE	1	1	afternoon	2018_07_24	1	12:40:40:17	12:40:41:16	Standing		Head down	Ears backwards	Eyes open	Tail in motion
PASTURE	1	1	afternoon	2018_07_24	1	12:40:41:17	12:40:42:16	Standing		Head down	Ears backwards	Eyes open	Tail in motion
PASTURE	1	1	afternoon	2018_07_24	1	12:40:42:17	12:40:43:16	Standing		Head down	Ears backwards	Eyes open	Tail in motion
PASTURE	1	1	afternoon	2018_07_24	1	12:40:43:17	12:40:44:16	Standing		Head down	Ears backwards	Eyes open	Tail in motion
PASTURE	1	1	afternoon	2018_07_24	1	12:40:44:17	12:40:45:16	Standing		Head down	Ears backwards	Eyes open	Tail in motion
PASTURE	1	1	afternoon	2018_07_24	1	12:40:45:17	12:40:46:16	Standing		Head down	Ears backwards	Eyes open	Tail in motion
PASTURE	1	1	afternoon	2018_07_24	1	12:40:46:17	12:40:47:16	Standing		Head down	Ears backwards	Eyes open	Tail in motion
PASTURE	1	1	afternoon	2018_07_24	1	12:40:47:17	12:40:48:16	Standing		Head down	Ears backwards	Eyes open	Tail in motion
PASTURE	1	1	afternoon	2018_07_24	1	12:40:48:17	12:40:49:16	Standing		Head down	Ears backwards	Eyes open	Tail in motion
PASTURE	1	1	afternoon	2018_07_24	1	12:40:49:17	12:40:50:16	Standing		Head up	Ears backwards	Eyes open	Tail in motion
PASTURE	1	1	afternoon	2018_07_24	1	12:40:50:17	12:40:51:16	Standing		Head up	Ears backwards	Eyes open	Tail in motion
PASTURE	1	1	afternoon	2018_07_24	1	12:40:51:17	12:40:52:16	Standing		Head up	Ears backwards	Eyes open	Tail in motion
PASTURE	1	1	afternoon	2018_07_24	1	12:40:52:17	12:40:53:16	Standing		Head up	Ears backwards	Eyes open	Tail in motion
PASTURE	1	1	afternoon	2018_07_24	1	12:40:53:17	12:40:54:16	Standing		Head up	Ears backwards	Eyes open	Tail in motion
PASTURE	1	1	afternoon	2018_07_24	1	12:40:54:17	12:40:55:16	Standing		Head up	Ears backwards	Eyes open	Tail in motion
PASTURE	1	1	afternoon	2018_07_24	1	12:40:55:17	12:40:56:16	Standing		Head up	Ears backwards	Eyes open	Tail in motion
PASTURE	1	1	afternoon	2018_07_24	1	12:40:56:17	12:40:57:16	Standing		Head up	Ears backwards	Eyes open	Tail in motion
PASTURE	1	1	afternoon	2018_07_24	1	12:40:57:17	12:40:58:16	Standing		Head up	Ears backwards	Eyes open	Tail in motion
PASTURE	1	1	afternoon	2018_07_24	1	12:40:58:17	12:40:59:16	Standing		Head up	Ears backwards	Eyes open	Tail in motion
PASTURE	1	1	afternoon	2018_07_24	1	12:40:59:17	12:41:00:16	Standing		Head up	Ears backwards	Eyes open	Tail in motion
PASTURE	1	1	afternoon	2018_07_24	1	12:41:00:17	12:41:01:16	Standing		Head up	Ears backwards	Eyes open	Tail in motion
PASTURE	1	1	afternoon	2018_07_24	1	12:41:01:17	12:41:02:16	Standing		Head up	Ears backwards	Eyes open	Tail in motion
PASTURE	1	1	afternoon	2018_07_24	1	12:41:02:17	12:41:03:16	Standing		Head up	Ears backwards	Eyes open	Tail in motion
PASTURE	1	1	afternoon	2018_07_24	1	12:41:03:17	12:41:04:16	Standing		Head up	Ears backwards	Eyes open	Tail in motion
PASTURE	1	1	afternoon	2018_07_24	1	12:41:04:17	12:41:05:16	Standing		Head up	Ears backwards	Eyes open	Tail in motion
PASTURE	1	1	afternoon	2018_07_24	1	12:41:05:17	12:41:06:16	Standing		Head up	Ears backwards	Eyes open	Tail in motion
PASTURE	1	1	afternoon	2018_07_24	1	12:41:06:17	12:41:07:16	Standing		Head up	Ears backwards	Eyes open	Tail in motion
PASTURE	1	1	afternoon	2018_07_24	1	12:41:07:17	12:41:08:16	Standing		Head up	Ears forwards	Eyes open	Tail in motion
PASTURE	1	1	afternoon	2018_07_24	1	12:41:08:17	12:41:09:16	Standing		Head up	Ears forwards	Eyes open	Tail in motion
PASTURE	1	1	afternoon	2018_07_24	1	12:41:09:17	12:41:10:16	Standing		Head up	Ears forwards	Eyes open	Tail in motion
PASTURE	1	1	afternoon	2018_07_24	1	12:41:10:17	12:41:11:16	Standing		Head up	Ears forwards	Eyes open	Tail in motion
PASTURE	1	1	afternoon	2018_07_24	1	12:41:11:17	12:41:12:16	Standing		Head up	Ears forwards	Eyes open	Tail in motion
PASTURE	1	1	afternoon	2018_07_24	1	12:41:12:17	12:41:13:16	Standing		Head up	Ears forwards	Eyes open	Tail in motion
PASTURE	1	1	afternoon	2018_07_24	1	12:41:13:17	12:41:14:16	Standing		Head up	Ears forwards	Eyes open	Tail in motion
PASTURE	1	1	afternoon	2018_07_24	1	12:41:14:17	12:41:15:16	Standing		Head up	Ears forwards	Eyes open	Tail in motion
PASTURE	1	1	afternoon	2018_07_24	1	12:41:15:17	12:41:16:16	Standing		Head up	Ears forwards	Eyes open	Tail in motion
PASTURE	1	1	afternoon	2018_07_24	1	12:41:16:17	12:41:17:16	Standing		Head up	Ears forwards	Eyes open	Tail in motion
PASTURE	1	1	afternoon	2018_07_24	1	12:41:17:17	12:41:18:16	Standing		Head up	Ears forwards	Eyes open	Tail in motion
PASTURE	1	1	afternoon	2018_07_24	1	12:41:18:17	12:41:19:16	Standing		Head up	Ears forwards	Eyes open	Tail in motion
PASTURE	1	1	afternoon	2018_07_24	1	12:41:19:17	12:41:20:16	Standing		Head up	Ears forwards	Eyes open	Tail in motion
PASTURE	1	1	afternoon	2018_07_24	1	12:41:20:17	12:41:21:16	Standing		Head up	Ears forwards	Eyes open	Tail in motion
PASTURE	1	1	afternoon	2018_07_24	1	12:41:21:17	12:41:22:16	Standing		Head up	Ears forwards	Eyes open	Tail in motion
PASTURE	1	1	afternoon	2018_07_24	1	12:41:47:17	12:41:48:16	Standing		Head up	Ears forwards	Eyes open	Tail hanging
PASTURE	1	1	afternoon	2018_07_24	1	12:41:48:17	12:41:49:16	Standing		Head up	Ears forwards	Eyes open	Tail hanging
PASTURE	1	1	afternoon	2018_07_24	1	12:41:49:17	12:41:50:16	Standing		Head up	Ears forwards	Eyes open	Tail hanging
PASTURE	1	1	afternoon	2018_07_24	1	12:41:50:17	12:41:51:16	Standing		Head up	Ears forwards	Eyes open	Tail hanging
PASTURE	1	1	afternoon	2018_07_24	1	12:41:51:17	12:41:52:16	Standing		Head up	Ears forwards	Eyes open	Tail hanging
PASTURE	1	1	afternoon	2018_07_24	1	12:41:52:17	12:41:53:16	Standing		Head up	Ears forwards	Eyes open	Tail hanging
PASTURE	1	1	afternoon	2018_07_24	1	12:41:53:17	12:41:54:16	Standing		Head up	Ears forwards	Eyes open	Tail hanging
PASTURE	1	1	afternoon	2018_07_24	1	12:41:54:17	12:41:55:16	Standing		Head up	Ears forwards	Eyes open	Tail hanging
PASTURE	1	1	afternoon	2018_07_24	1	12:41:55:17	12:41:56:16	Standing		Head up	Ears forwards	Eyes open	Tail hanging
PASTURE	1	1	afternoon	2018_07_24	1	12:41:56:17	12:41:57:16	Standing		Head up	Ears forwards	Eyes open	Tail hanging
PASTURE	1	1	afternoon	2018_07_24	1	12:41:57:17	12:41:58:16	Standing		Head up	Ears forwards	Eyes open	Tail hanging
PASTURE	1	1	afternoon	2018_07_24	1	12:41:58:17	12:41:59:16	Standing		Head up	Ears forwards	Eyes open	Tail in motion
PASTURE	1	1	afternoon	2018_07_24	1	12:41:59:17	12:42:00:16	Standing		Head up	Ears forwards	Eyes open	Tail in motion
PASTURE	1	1	afternoon	2018_07_24	1	12:42:00:17	12:42:01:16	Standing		Head up	Ears forwards	Eyes open	Tail in motion
PASTURE	1	1	afternoon	2018_07_24	1	12:42:01:17	12:42:02:16	Standing		Head up	Ears forwards	Eyes open	Tail in motion
PASTURE	1	1	afternoon	2018_07_24	1	12:42:02:17	12:42:03:16	Standing		Head up	Ears forwards	Eyes open	Tail in motion
PASTURE	1	1	afternoon	2018_07_24	1	12:42:03:17	12:42:04:16	Standing		Head up	Ears forwards	Eyes open	Tail in motion
PASTURE	1	1	afternoon	2018_07_24	1	12:42:04:17	12:42:05:16	Standing		Head up	Ears forwards	Eyes open	Tail in motion
PASTURE	1	1	afternoon	2018_07_24	1	12:42:05:17	12:42:06:16	Standing		Head up	Ears forwards	Eyes open	Tail in motion
PASTURE	1	1	afternoon	2018_07_24	1	12:42:06:17	12:42:07:16	Standing		Head up	Ears forwards	Eyes open	Tail in motion
PASTURE	1	1	afternoon	2018_07_24	1	12:42:07:17	12:42:08:16	Standing		Head up	Ears forwards	Eyes open	Tail in motion
PASTURE	1	1	afternoon	2018_07_24	1	12:42:08:17	12:42:09:16	Standing		Head up	Ears forwards	Eyes open	Tail in motion
PASTURE	1	1	afternoon	2018_07_24	1	12:42:09:17	12:42:10:16	Standing		Head up	Ears forwards	Eyes open	Tail in motion
PASTURE	1	1	afternoon	2018_07_24	1	12:42:10:17	12:42:11:16	Standing		Head up	Ears forwards	Eyes open	Tail in motion
PASTURE	1	1	afternoon	2018_07_24	1	12:42:11:17	12:42:12:16	Standing		Head up	Ears forwards	Eyes open	Tail in motion
PASTURE	1	1	afternoon	2018_07_24	1	12:42:12:17	12:42:13:16	Standing		Head up	Ears forwards	Eyes open	Tail in motion
PASTURE	1	1	afternoon	2018_07_24	1	12:42:13:17	12:42:14:16	Standing		Head up	Ears forwards	Eyes open	Tail in motion
PASTURE	1	1	afternoon	2018_07_24	1	12:42:14:17	12:42:15:16	Standing		Head up	Ears forwards	Eyes open	Tail in motion
PASTURE	1	1	afternoon	2018_07_24	1	12:42:15:17	12:42:16:16	Standing		Head up	Ears forwards	Eyes open	Tail in motion
PASTURE	1	1	afternoon	2018_07_24	1	12:42:16:17	12:42:17:16	Standing		Head up	Ears forwards	Eyes open	Tail in motion
PASTURE	1	1	afternoon	2018_07_24	1	12:42:17:17	12:42:18:16	Standing		Head up	Ears forwards	Eyes open	Tail in motion
PASTURE	1	1	afternoon	2018_07_24	1	12:42:18:17	12:42:19:16	Standing		Head up	Ears forwards	Eyes open	Tail in motion
PASTURE	1	1	afternoon	2018_07_24	1	12:42:19:17	12:42:20:16	Standing		Head up	Ears forwards	Eyes open	Tail in motion
PASTURE	1	1	afternoon	2018_07_24	1	12:42:20:17	12:42:21:16	Standing		Head up	Ears forwards	Eyes open	Tail in motion
PASTURE	1	1	afternoon	2018_07_24	1	12:42:21:17	12:42:22:16	Standing		Head up	Ears forwards	Eyes open	Tail in motion
PASTURE	1	1	afternoon	2018_07_24	1	12:42:22:17	12:42:23:16	Standing		Head up	Ears forwards	Eyes open	Tail in motion
PASTURE	1	1	afternoon	2018_07_24	1	12:42:23:17	12:42:24:16	Standing		Head up	Ears forwards	Eyes open	Tail in motion
PASTURE	1	1	afternoon	2018_07_24	1	12:42:24:17	12:42:25:16	Standing		Head up	Ears forwards	Eyes open	Tail in motion
PASTURE	1	1	afternoon	2018_07_24	1	12:42:25:17	12:42:26:16	Standing		Head up	Ears forwards	Eyes open	Tail in motion
PASTURE	1	1	afternoon	2018_07_24	1	12:42:26:17	12:42:27:16	Standing		Head up	Ears forwards	Eyes open	Tail in motion
PASTURE	1	1	afternoon	2018_07_24	1	12:42:27:17	12:42:28:16	Standing		Head up	Ears forwards	Eyes open	Tail in motion
PASTURE	1	1	afternoon	2018_07_24	1	12:42:28:17	12:42:29:16	Standing		Head up	Ears forwards	Eyes open	Tail in motion
PASTURE	1	1	afternoon	2018_07_24	1	12:42:29:17	12:42:30:16	Standing		Head up	Ears forwards	Eyes open	Tail in motion
PASTURE	1	1	afternoon	2018_07_24	1	12:42:30:17	12:42:31:16	Standing		Head up	Ears forwards	Eyes open	Tail in motion
PASTURE	1	1	afternoon	2018_07_24	1	12:42:31:17	12:42:32:16	Standing		Head up	Ears forwards	Eyes open	Tail in motion
PASTURE	1	1	afternoon	2018_07_24	1	12:42:32:17	12:42:33:16	Standing		Head up	Ears forwards	Eyes open	Tail in motion
PASTURE	1	1	afternoon	2018_07_24	1	12:42:33:17	12:42:34:16	Standing		Head up	Ears forwards	Eyes open	Tail in motion
PASTURE	1	1	afternoon	2018_07_24	1	12:42:34:17	12:42:35:16	Standing		Head up	Ears backwards	Eyes open	Tail in motion
PASTURE	1	1	afternoon	2018_07_24	1	12:42:35:17	12:42:36:16	Standing		Head up	Ears backwards	Eyes open	Tail in motion
PASTURE	1	1	afternoon	2018_07_24	1	12:42:36:17	12:42:37:16	Standing		Head up	Ears backwards	Eyes open	Tail in motion
PASTURE	1	1	afternoon	2018_07_24	1	12:42:37:17	12:42:38:16	Standing		Head up	Ears backwards	Eyes open	Tail in motion
PASTURE	1	1	afternoon	2018_07_24	1	12:42:38:17	12:42:39:16	Standing		Head up	Ears backwards	Eyes open	Tail in motion
PASTURE	1	1	afternoon	2018_07_24	1	12:42:39:17	12:42:40:16	Standing		Head up	Ears backwards	Eyes open	Tail in motion
PASTURE	1	1	afternoon	2018_07_24	1	12:42:40:17	12:42:41:16	Standing		Head up	Ears backwards	Eyes open	Tail in motion
PASTURE	1	1	afternoon	2018_07_24	1	12:42:41:17	12:42:42:16	Standing		Head up	Ears backwards	Eyes open	Tail in motion
PASTURE	1	1	afternoon	2018_07_24	1	12:42:42:17	12:42:43:16	Standing		Head up	Ears backwards	Eyes open	Tail in motion
PASTURE	1	1	afternoon	2018_07_24	1	12:42:43:17	12:42:44:16	Standing		Head up	Ears forwards	Eyes open	Tail in motion
PASTURE	1	1	afternoon	2018_07_24	1	12:42:44:17	12:42:45:16	Standing		Head up	Ears forwards	Eyes open	Tail in motion
PASTURE	1	1	afternoon	2018_07_24	1	12:42:45:17	12:42:46:16	Standing		Head up	Ears forwards	Eyes open	Tail in motion
PASTURE	1	1	afternoon	2018_07_24	1	12:42:46:17	12:42:47:16	Standing		Head up	Ears forwards	Eyes open	Tail in motion
PASTURE	1	1	afternoon	2018_07_24	1	12:42:47:17	12:42:48:16	Standing		Head up	Ears forwards	Eyes open	Tail in motion
PASTURE	1	1	afternoon	2018_07_24	1	12:42:48:17	12:42:49:16	Standing		Head up	Ears forwards	Eyes open	Tail in motion
PASTURE	1	1	afternoon	2018_07_24	1	12:42:49:17	12:42:50:16	Standing		Head up	Ears forwards	Eyes open	Tail in motion
PASTURE	1	1	afternoon	2018_07_24	1	12:42:50:17	12:42:51:16	Standing		Head up	Ears forwards	Eyes open	Tail in motion
PASTURE	1	1	afternoon	2018_07_24	1	12:42:51:17	12:42:52:16	Standing		Head up	Ears forwards	Eyes open	Tail in motion
PASTURE	1	1	afternoon	2018_07_24	1	12:42:52:17	12:42:53:16	Standing		Head up	Ears forwards	Eyes open	Tail in motion
PASTURE	1	1	afternoon	2018_07_24	1	12:42:53:17	12:42:54:16	Standing		Head up	Ears forwards	Eyes open	Tail in motion
PASTURE	1	1	afternoon	2018_07_24	1	12:42:54:17	12:42:55:16	Standing		Head up	Ears forwards	Eyes open	Tail in motion
PASTURE	1	1	afternoon	2018_07_24	1	12:42:55:17	12:42:56:16	Standing		Head up	Ears asymmetrical	Eyes open	Tail in motion
PASTURE	1	1	afternoon	2018_07_24	1	12:42:56:17	12:42:57:16	Standing		Head up	Ears asymmetrical	Eyes open	Tail in motion
PASTURE	1	1	afternoon	2018_07_24	1	12:42:57:17	12:42:58:16	Standing		Head up	Ears asymmetrical	Eyes open	Tail in motion
PASTURE	1	1	afternoon	2018_07_24	1	12:42:58:17	12:42:59:16	Standing		Head up	Ears asymmetrical	Eyes open	Tail in motion
PASTURE	1	1	afternoon	2018_07_24	1	12:42:59:17	12:43:00:16	Standing		Head up	Ears asymmetrical	Eyes open	Tail in motion
PASTURE	1	1	afternoon	2018_07_24	1	12:43:00:17	12:43:01:16	Standing		Head up	Ears asymmetrical	Eyes open	Tail in motion
PASTURE	1	1	afternoon	2018_07_24	1	12:43:01:17	12:43:02:16	Standing		Head up	Ears asymmetrical	Eyes open	Tail in motion
PASTURE	1	1	afternoon	2018_07_24	1	12:43:02:17	12:43:03:16	Standing		Head up	Ears asymmetrical	Eyes open	Tail in motion
PASTURE	1	1	afternoon	2018_07_24	1	12:43:03:17	12:43:04:16	Standing		Head up	Ears asymmetrical	Eyes open	Tail in motion
PASTURE	1	1	afternoon	2018_07_24	1	12:43:04:17	12:43:05:16	Standing		Head up	Ears asymmetrical	Eyes open	Tail in motion
PASTURE	1	1	afternoon	2018_07_24	1	12:43:05:17	12:43:06:16	Standing		Head up	Ears forwards	Eyes open	Tail in motion
PASTURE	1	1	afternoon	2018_07_24	1	12:43:06:17	12:43:07:16	Standing		Head up	Ears forwards	Eyes open	Tail in motion
PASTURE	1	1	afternoon	2018_07_24	1	12:43:07:17	12:43:08:16	Standing		Head up	Ears forwards	Eyes open	Tail in motion
PASTURE	1	1	afternoon	2018_07_24	1	12:43:08:17	12:43:09:16	Standing		Head up	Ears forwards	Eyes open	Tail in motion
PASTURE	1	1	afternoon	2018_07_24	1	12:43:09:17	12:43:10:16	Standing		Head up	Ears forwards	Eyes open	Tail in motion
PASTURE	1	1	afternoon	2018_07_24	1	12:43:10:17	12:43:11:16	Standing		Head up	Ears forwards	Eyes open	Tail in motion
PASTURE	1	1	afternoon	2018_07_24	1	12:43:11:17	12:43:12:16	Standing		Head up	Ears forwards	Eyes open	Tail in motion
PASTURE	1	1	afternoon	2018_07_24	1	12:43:12:17	12:43:13:16	Standing		Head up	Ears forwards	Eyes open	Tail in motion
PASTURE	1	1	afternoon	2018_07_24	1	12:43:13:17	12:43:14:16	Standing		Head up	Ears forwards	Eyes open	Tail in motion
PASTURE	1	1	afternoon	2018_07_24	1	12:43:14:17	12:43:15:16	Standing		Head up	Ears forwards	Eyes open	Tail in motion
PASTURE	1	1	afternoon	2018_07_24	1	12:43:15:17	12:43:16:16	Standing		Head up	Ears forwards	Eyes open	Tail in motion
PASTURE	1	1	afternoon	2018_07_24	1	12:43:16:17	12:43:17:16	Standing		Head up	Ears forwards	Eyes open	Tail in motion
PASTURE	1	1	afternoon	2018_07_24	1	12:43:17:17	12:43:18:16	Standing		Head up	Ears forwards	Eyes open	Tail in motion
PASTURE	1	1	afternoon	2018_07_24	1	12:43:18:17	12:43:19:16	Standing		Head up	Ears forwards	Eyes open	Tail in motion
PASTURE	1	1	afternoon	2018_07_24	1	12:43:19:17	12:43:20:16	Standing		Head up	Ears forwards	Eyes open	Tail in motion
PASTURE	1	1	afternoon	2018_07_24	1	12:43:20:17	12:43:21:16	Standing		Head up	Ears forwards	Eyes open	Tail in motion
PASTURE	1	1	afternoon	2018_07_24	1	12:43:21:17	12:43:22:16	Standing		Head up	Ears asymmetrical	Eyes open	Tail in motion
PASTURE	1	1	afternoon	2018_07_24	1	12:43:22:17	12:43:23:16	Standing		Head up	Ears asymmetrical	Eyes open	Tail in motion
PASTURE	1	1	afternoon	2018_07_24	1	12:43:23:17	12:43:24:16	Standing		Head up	Ears asymmetrical	Eyes open	Tail in motion
PASTURE	1	1	afternoon	2018_07_24	1	12:43:24:17	12:43:25:16	Standing		Head up	Ears asymmetrical	Eyes open	Tail in motion
PASTURE	1	1	afternoon	2018_07_24	1	12:43:25:17	12:43:26:16	Standing		Head up	Ears asymmetrical	Eyes open	Tail in motion
PASTURE	1	1	afternoon	2018_07_24	1	12:43:26:17	12:43:27:16	Standing		Head up	Ears asymmetrical	Eyes open	Tail in motion
PASTURE	1	1	afternoon	2018_07_24	1	12:43:27:17	12:43:28:16	Standing		Head up	Ears asymmetrical	Eyes open	Tail in motion
PASTURE	1	1	afternoon	2018_07_24	1	12:43:28:17	12:43:29:16	Standing		Head up	Ears asymmetrical	Eyes open	Tail in motion
PASTURE	1	1	afternoon	2018_07_24	1	12:43:29:17	12:43:30:16	Standing		Head up	Ears asymmetrical	Eyes open	Tail in motion
PASTURE	1	1	afternoon	2018_07_24	1	12:43:30:17	12:43:31:16	Standing		Head up	Ears asymmetrical	Eyes open	Tail in motion
PASTURE	1	1	afternoon	2018_07_24	1	12:43:31:17	12:43:32:16	Standing		Head up	Ears asymmetrical	Eyes open	Tail in motion
PASTURE	1	1	afternoon	2018_07_24	1	12:43:32:17	12:43:33:16	Standing		Head up	Ears asymmetrical	Eyes open	Tail in motion
PASTURE	1	1	afternoon	2018_07_24	1	12:43:33:17	12:43:34:16	Standing		Head up	Ears asymmetrical	Eyes open	Tail in motion
PASTURE	1	1	afternoon	2018_07_24	1	12:43:34:17	12:43:35:16	Standing		Head up	Ears asymmetrical	Eyes open	Tail in motion
PASTURE	1	1	afternoon	2018_07_24	1	12:43:35:17	12:43:36:16	Standing		Head up	Ears asymmetrical	Eyes open	Tail in motion
PASTURE	1	1	afternoon	2018_07_24	1	12:43:36:17	12:43:37:16	Standing		Head up	Ears asymmetrical	Eyes open	Tail in motion
PASTURE	1	1	afternoon	2018_07_24	1	12:43:37:17	12:43:38:16	Standing		Head up	Ears asymmetrical	Eyes open	Tail in motion
PASTURE	1	1	afternoon	2018_07_24	1	12:43:38:17	12:43:39:16	Standing		Head up	Ears asymmetrical	Eyes open	Tail in motion
PASTURE	1	1	afternoon	2018_07_24	1	12:43:39:17	12:43:40:16	Standing		Head up	Ears asymmetrical	Eyes open	Tail in motion
PASTURE	1	1	afternoon	2018_07_24	1	12:43:40:17	12:43:41:16	Standing		Head up	Ears asymmetrical	Eyes open	Tail in motion
PASTURE	1	1	afternoon	2018_07_24	1	12:43:41:17	12:43:42:16	Standing		Head up	Ears asymmetrical	Eyes open	Tail in motion
PASTURE	1	1	afternoon	2018_07_24	1	12:43:42:17	12:43:43:16	Standing		Head up	Ears asymmetrical	Eyes open	Tail in motion
PASTURE	1	1	afternoon	2018_07_24	1	12:43:43:17	12:43:44:16	Standing		Head up	Ears asymmetrical	Eyes open	Tail in motion
PASTURE	1	1	afternoon	2018_07_24	1	12:43:44:17	12:43:45:16	Standing		Head up	Ears asymmetrical	Eyes open	Tail in motion
PASTURE	1	1	afternoon	2018_07_24	1	12:43:45:17	12:43:46:16	Standing		Head up	Ears asymmetrical	Eyes open	Tail in motion
PASTURE	1	1	afternoon	2018_07_24	1	12:43:46:17	12:43:47:16	Standing		Head up	Ears asymmetrical	Eyes open	Tail in motion
PASTURE	1	1	afternoon	2018_07_24	1	12:43:47:17	12:43:48:16	Standing		Head up	Ears asymmetrical	Eyes open	Tail in motion
PASTURE	1	1	afternoon	2018_07_24	1	12:43:48:17	12:43:49:16	Standing		Head up	Ears asymmetrical	Eyes open	Tail in motion
PASTURE	1	1	afternoon	2018_07_24	1	12:43:49:17	12:43:50:16	Standing		Head up	Ears asymmetrical	Eyes open	Tail in motion
PASTURE	1	1	afternoon	2018_07_24	1	12:43:50:17	12:43:51:16	Standing		Head up	Ears asymmetrical	Eyes open	Tail in motion
PASTURE	1	1	afternoon	2018_07_24	1	12:43:51:17	12:43:52:16	Standing		Head up	Ears asymmetrical	Eyes open	Tail in motion
PASTURE	1	1	afternoon	2018_07_24	1	12:43:52:17	12:43:53:16	Standing		Head up	Ears asymmetrical	Eyes open	Tail in motion
PASTURE	1	1	afternoon	2018_07_24	1	12:43:53:17	12:43:54:16	Standing		Head up	Ears asymmetrical	Eyes open	Tail in motion
PASTURE	1	1	afternoon	2018_07_24	1	12:43:54:17	12:43:55:16	Standing		Head up	Ears asymmetrical	Eyes open	Tail in motion
PASTURE	1	1	afternoon	2018_07_24	1	12:43:55:17	12:43:56:16	Standing		Head up	Ears asymmetrical	Eyes open	Tail in motion
PASTURE	1	1	afternoon	2018_07_24	1	12:43:56:17	12:43:57:16	Standing		Head up	Ears asymmetrical	Eyes open	Tail in motion
PASTURE	1	1	afternoon	2018_07_24	1	12:43:57:17	12:43:58:16	Standing		Head up	Ears asymmetrical	Eyes open	Tail in motion
PASTURE	1	1	afternoon	2018_07_24	1	12:43:58:17	12:43:59:16	Standing		Head up	Ears forwards	Eyes open	Tail in motion
PASTURE	1	1	afternoon	2018_07_24	1	12:43:59:17	12:44:00:16	Standing		Head up	Ears forwards	Eyes open	Tail in motion
PASTURE	1	1	afternoon	2018_07_24	1	12:44:00:17	12:44:01:16	Standing		Head up	Ears forwards	Eyes open	Tail in motion
PASTURE	1	1	afternoon	2018_07_24	1	12:44:01:17	12:44:02:16	Standing		Head up	Ears forwards	Eyes open	Tail in motion
PASTURE	1	1	afternoon	2018_07_24	1	12:44:02:17	12:44:03:16	Standing		Head up	Ears forwards	Eyes open	Tail in motion
PASTURE	1	1	afternoon	2018_07_24	1	12:44:03:17	12:44:04:16	Standing		Head up	Ears forwards	Eyes open	Tail in motion
PASTURE	1	1	afternoon	2018_07_24	1	12:44:04:17	12:44:05:16	Standing		Head up	Ears forwards	Eyes open	Tail in motion
PASTURE	1	1	afternoon	2018_07_24	1	12:44:05:17	12:44:06:16	Standing		Head up	Ears forwards	Eyes open	Tail in motion
PASTURE	1	1	afternoon	2018_07_24	1	12:44:06:17	12:44:07:16	Standing		Head up	Ears forwards	Eyes open	Tail in motion
PASTURE	1	1	afternoon	2018_07_24	1	12:44:07:17	12:44:08:16	Standing		Head up	Ears forwards	Eyes open	Tail in motion
PASTURE	1	1	afternoon	2018_07_24	1	12:44:08:17	12:44:09:16	Standing		Head up	Ears forwards	Eyes open	Tail in motion
PASTURE	1	1	afternoon	2018_07_24	1	12:44:09:17	12:44:10:16	Standing		Head up	Ears forwards	Eyes open	Tail in motion
PASTURE	1	1	afternoon	2018_07_24	1	12:44:10:17	12:44:11:16	Standing		Head up	Ears forwards	Eyes open	Tail in motion
PASTURE	1	1	afternoon	2018_07_24	1	12:44:11:17	12:44:12:16	Standing		Head up	Ears forwards	Eyes open	Tail in motion
PASTURE	1	1	afternoon	2018_07_24	1	12:44:12:17	12:44:13:16	Standing		Head up	Ears forwards	Eyes open	Tail in motion
PASTURE	1	1	afternoon	2018_07_24	1	12:44:13:17	12:44:14:16	Standing		Head up	Ears forwards	Eyes open	Tail in motion
PASTURE	1	1	afternoon	2018_07_24	1	12:44:14:17	12:44:15:16	Standing		Head up	Ears forwards	Eyes open	Tail in motion
PASTURE	1	1	afternoon	2018_07_24	1	12:44:15:17	12:44:16:16	Standing		Head up	Ears forwards	Eyes open	Tail in motion
PASTURE	1	1	afternoon	2018_07_24	1	12:44:16:17	12:44:17:16	Standing		Head up	Ears forwards	Eyes open	Tail in motion
PASTURE	1	1	afternoon	2018_07_24	1	12:44:17:17	12:44:18:16	Standing		Head up	Ears forwards	Eyes open	Tail in motion
PASTURE	1	1	afternoon	2018_07_24	1	12:44:18:17	12:44:19:16	Standing		Head up	Ears forwards	Eyes open	Tail in motion
PASTURE	1	1	afternoon	2018_07_24	1	12:44:19:17	12:44:20:16	Standing		Head up	Ears forwards	Eyes open	Tail in motion
PASTURE	1	1	afternoon	2018_07_24	1	12:44:20:17	12:44:21:16	Standing		Head up	Ears forwards	Eyes open	Tail in motion
PASTURE	1	1	afternoon	2018_07_24	1	12:44:21:17	12:44:22:16	Standing		Head up	Ears forwards	Eyes open	Tail in motion
PASTURE	1	1	afternoon	2018_07_24	1	12:44:22:17	12:44:23:16	Standing		Head up	Ears forwards	Eyes open	Tail in motion
PASTURE	1	1	afternoon	2018_07_24	1	12:44:23:17	12:44:24:16	Standing		Head up	Ears forwards	Eyes open	Tail in motion
PASTURE	1	1	afternoon	2018_07_24	1	12:44:24:17	12:44:25:16	Standing		Head up	Ears forwards	Eyes open	Tail in motion
PASTURE	1	1	afternoon	2018_07_24	1	12:44:25:17	12:44:26:16	Standing		Head up	Ears forwards	Eyes open	Tail in motion
PASTURE	1	1	afternoon	2018_07_24	1	12:44:26:17	12:44:27:16	Standing		Head up	Ears forwards	Eyes open	Tail in motion
PASTURE	1	1	afternoon	2018_07_24	1	12:44:27:17	12:44:28:16	Standing		Head up	Ears forwards	Eyes open	Tail in motion
PASTURE	1	1	afternoon	2018_07_24	1	12:44:28:17	12:44:29:16	Standing		Head up	Ears forwards	Eyes open	Tail in motion
PASTURE	1	1	afternoon	2018_07_24	1	12:44:29:17	12:44:30:16	Standing		Head up	Ears forwards	Eyes open	Tail in motion
PASTURE	1	1	afternoon	2018_07_24	1	12:44:30:17	12:44:31:16	Standing		Head up	Ears forwards	Eyes open	Tail in motion
PASTURE	1	1	afternoon	2018_07_24	1	12:44:31:17	12:44:32:16	Standing		Head up	Ears forwards	Eyes open	Tail in motion
PASTURE	1	1	afternoon	2018_07_24	1	12:44:32:17	12:44:33:16	Standing		Head up	Ears forwards	Eyes open	Tail in motion
PASTURE	1	1	afternoon	2018_07_24	1	12:44:33:17	12:44:34:16	Standing		Head up	Ears forwards	Eyes open	Tail in motion
PASTURE	1	1	afternoon	2018_07_24	1	12:44:34:17	12:44:35:16	Standing		Head up	Ears forwards	Eyes open	Tail in motion
PASTURE	1	1	afternoon	2018_07_24	1	12:44:35:17	12:44:36:16	Standing		Head up	Ears forwards	Eyes open	Tail in motion
PASTURE	1	1	afternoon	2018_07_24	1	12:44:36:17	12:44:37:16	Standing		Head up	Ears forwards	Eyes open	Tail in motion
PASTURE	1	1	afternoon	2018_07_24	1	12:44:37:17	12:44:38:16	Standing		Head up	Ears forwards	Eyes open	Tail in motion
PASTURE	1	1	afternoon	2018_07_24	1	12:44:38:17	12:44:39:16	Standing		Head up	Ears forwards	Eyes open	Tail in motion
PASTURE	1	1	afternoon	2018_07_24	1	12:44:39:17	12:44:40:16	Standing		Head up	Ears forwards	Eyes open	Tail in motion
PASTURE	1	1	afternoon	2018_07_24	1	12:44:40:17	12:44:41:16	Standing		Head up	Ears forwards	Eyes open	Tail in motion
PASTURE	1	1	afternoon	2018_07_24	1	12:44:41:17	12:44:42:16	Standing		Head up	Ears forwards	Eyes open	Tail in motion
PASTURE	1	1	afternoon	2018_07_24	1	12:44:42:17	12:44:43:16	Standing		Head up	Ears forwards	Eyes open	Tail in motion
PASTURE	1	1	afternoon	2018_07_24	1	12:44:43:17	12:44:44:16	Standing		Head up	Ears forwards	Eyes open	Tail in motion
PASTURE	1	1	afternoon	2018_07_24	1	12:44:44:17	12:44:45:16	Standing		Head up	Ears forwards	Eyes open	Tail in motion
PASTURE	1	1	afternoon	2018_07_24	1	12:44:45:17	12:44:46:16	Standing		Head up	Ears forwards	Eyes open	Tail hanging
PASTURE	1	1	afternoon	2018_07_24	1	12:44:46:17	12:44:47:16	Standing		Head up	Ears forwards	Eyes open	Tail hanging
PASTURE	1	1	afternoon	2018_07_24	1	12:44:47:17	12:44:48:16	Standing		Head up	Ears forwards	Eyes open	Tail hanging
PASTURE	1	1	afternoon	2018_07_24	1	12:44:48:17	12:44:49:16	Standing		Head up	Ears forwards	Eyes open	Tail hanging
PASTURE	1	1	afternoon	2018_07_24	1	12:44:49:17	12:44:50:16	Standing		Head up	Ears forwards	Eyes open	Tail hanging
PASTURE	1	1	afternoon	2018_07_24	1	12:44:50:17	12:44:51:16	Standing		Head up	Ears forwards	Eyes open	Tail hanging
PASTURE	1	1	afternoon	2018_07_24	1	12:44:51:17	12:44:52:16	Standing		Head up	Ears forwards	Eyes open	Tail hanging
PASTURE	1	1	afternoon	2018_07_24	1	12:44:52:17	12:44:53:16	Standing		Head up	Ears forwards	Eyes open	Tail hanging
PASTURE	1	1	afternoon	2018_07_24	1	12:44:53:17	12:44:54:16	Standing		Head up	Ears forwards	Eyes open	Tail hanging
PASTURE	1	1	afternoon	2018_07_24	1	12:44:54:17	12:44:55:16	Standing		Head up	Ears forwards	Eyes open	Tail in motion
PASTURE	1	1	afternoon	2018_07_24	1	12:44:55:17	12:44:56:16	Standing		Head up	Ears forwards	Eyes open	Tail in motion
PASTURE	1	1	afternoon	2018_07_24	1	12:44:56:17	12:44:57:16	Standing		Head up	Ears forwards	Eyes open	Tail in motion
PASTURE	1	1	afternoon	2018_07_24	1	12:44:57:17	12:44:58:16	Standing		Head up	Ears forwards	Eyes open	Tail in motion
PASTURE	1	1	afternoon	2018_07_24	1	12:44:58:17	12:44:59:16	Standing		Head up	Ears forwards	Eyes open	Tail in motion
PASTURE	1	1	afternoon	2018_07_24	1	12:44:59:17	12:45:00:16	Standing		Head up	Ears forwards	Eyes open	Tail in motion
PASTURE	1	1	afternoon	2018_07_24	1	12:45:00:17	12:45:01:16	Standing		Head up	Ears forwards	Eyes open	Tail in motion
PASTURE	1	1	afternoon	2018_07_24	1	12:45:01:17	12:45:02:16	Standing		Head up	Ears forwards	Eyes open	Tail in motion
PASTURE	1	1	afternoon	2018_07_24	1	12:45:02:17	12:45:03:16	Standing		Head up	Ears forwards	Eyes open	Tail in motion
PASTURE	1	1	afternoon	2018_07_24	1	12:45:03:17	12:45:04:16	Standing		Head up	Ears forwards	Eyes open	Tail in motion
PASTURE	1	1	afternoon	2018_07_24	1	12:45:04:17	12:45:05:16	Standing		Head up	Ears forwards	Eyes open	Tail in motion
PASTURE	1	1	afternoon	2018_07_24	1	12:45:05:17	12:45:06:16	Standing		Head up	Ears forwards	Eyes open	Tail in motion
PASTURE	1	1	afternoon	2018_07_24	1	12:45:06:17	12:45:07:16	Standing		Head up	Ears forwards	Eyes open	Tail in motion
PASTURE	1	1	afternoon	2018_07_24	1	12:45:07:17	12:45:08:16	Standing		Head up	Ears forwards	Eyes open	Tail in motion
PASTURE	1	1	afternoon	2018_07_24	1	12:45:08:17	12:45:09:16	Standing		Head up	Ears forwards	Eyes open	Tail in motion
PASTURE	1	1	afternoon	2018_07_24	1	12:45:09:17	12:45:10:16	Standing		Head up	Ears forwards	Eyes open	Tail in motion
PASTURE	1	1	afternoon	2018_07_24	1	12:45:10:17	12:45:11:16	Standing		Head up	Ears forwards	Eyes open	Tail in motion
PASTURE	1	1	afternoon	2018_07_24	1	12:45:11:17	12:45:12:16	Standing		Head up	Ears forwards	Eyes open	Tail in motion
PASTURE	1	1	afternoon	2018_07_24	1	12:45:12:17	12:45:13:16	Standing		Head up	Ears forwards	Eyes open	Tail in motion
PASTURE	1	1	afternoon	2018_07_24	1	12:45:13:17	12:45:14:16	Standing		Head up	Ears forwards	Eyes open	Tail in motion
PASTURE	1	1	afternoon	2018_07_24	1	12:45:14:17	12:45:15:16	Standing		Head up	Ears forwards	Eyes open	Tail in motion
PASTURE	1	1	afternoon	2018_07_24	1	12:45:15:17	12:45:16:16	Standing		Head up	Ears forwards	Eyes open	Tail in motion
PASTURE	1	1	afternoon	2018_07_24	1	12:45:16:17	12:45:17:16	Standing		Head up	Ears forwards	Eyes open	Tail in motion
PASTURE	1	1	afternoon	2018_07_24	1	12:45:17:17	12:45:18:16	Standing		Head up	Ears forwards	Eyes open	Tail in motion
PASTURE	1	1	afternoon	2018_07_24	1	12:45:18:17	12:45:19:16	Standing		Head up	Ears forwards	Eyes open	Tail in motion
PASTURE	1	1	afternoon	2018_07_24	1	12:45:19:17	12:45:20:16	Standing		Head up	Ears forwards	Eyes open	Tail in motion
PASTURE	1	1	afternoon	2018_07_24	1	12:45:20:17	12:45:21:16	Standing		Head up	Ears forwards	Eyes open	Tail in motion
PASTURE	1	1	afternoon	2018_07_24	1	12:45:21:17	12:45:22:16	Standing		Head up	Ears forwards	Eyes open	Tail in motion
PASTURE	1	1	afternoon	2018_07_24	1	12:45:22:17	12:45:23:16	Standing		Head up	Ears forwards	Eyes open	Tail in motion
PASTURE	1	1	afternoon	2018_07_24	1	12:45:23:17	12:45:24:16	Standing		Head up	Ears forwards	Eyes open	Tail in motion
PASTURE	1	1	afternoon	2018_07_24	1	12:45:24:17	12:45:25:16	Standing		Head up	Ears forwards	Eyes open	Tail in motion
PASTURE	1	1	afternoon	2018_07_24	1	12:45:25:17	12:45:26:16	Standing		Head up	Ears forwards	Eyes open	Tail in motion
PASTURE	1	1	afternoon	2018_07_24	1	12:45:26:17	12:45:27:16	Standing		Head up	Ears forwards	Eyes open	Tail in motion
PASTURE	1	1	afternoon	2018_07_24	1	12:45:27:17	12:45:28:16	Standing		Head up	Ears forwards	Eyes open	Tail in motion
PASTURE	1	1	afternoon	2018_07_24	1	12:45:28:17	12:45:29:16	Standing		Head up	Ears forwards	Eyes open	Tail in motion
PASTURE	1	1	afternoon	2018_07_24	1	12:45:29:17	12:45:30:16	Standing		Head up	Ears forwards	Eyes open	Tail in motion
PASTURE	1	1	afternoon	2018_07_24	1	12:45:30:17	12:45:31:16	Standing		Head up	Ears forwards	Eyes open	Tail in motion
PASTURE	1	1	afternoon	2018_07_24	1	12:45:31:17	12:45:32:16	Standing		Head up	Ears forwards	Eyes open	Tail in motion
PASTURE	1	1	afternoon	2018_07_24	1	12:45:32:17	12:45:33:16	Standing		Head up	Ears forwards	Eyes open	Tail in motion
PASTURE	1	1	afternoon	2018_07_24	1	12:45:33:17	12:45:34:16	Standing		Head up	Ears forwards	Eyes open	Tail in motion
PASTURE	1	1	afternoon	2018_07_24	1	12:45:34:17	12:45:35:16	Standing		Head up	Ears forwards	Eyes open	Tail in motion
PASTURE	1	1	afternoon	2018_07_24	1	12:45:35:17	12:45:36:16	Standing		Head up	Ears forwards	Eyes open	Tail in motion
PASTURE	1	1	afternoon	2018_07_24	1	12:45:36:17	12:45:37:16	Standing		Head up	Ears forwards	Eyes open	Tail in motion
PASTURE	1	1	afternoon	2018_07_24	1	12:45:37:17	12:45:38:16	Standing		Head up	Ears forwards	Eyes open	Tail in motion
PASTURE	1	1	afternoon	2018_07_24	1	12:45:38:17	12:45:39:16	Standing		Head up	Ears forwards	Eyes open	Tail in motion
PASTURE	1	1	afternoon	2018_07_24	1	12:45:39:17	12:45:40:16	Standing		Head up	Ears forwards	Eyes open	Tail in motion
PASTURE	1	1	afternoon	2018_07_24	1	12:45:40:17	12:45:41:16	Standing		Head up	Ears forwards	Eyes open	Tail in motion
PASTURE	1	1	afternoon	2018_07_24	1	12:45:41:17	12:45:42:16	Standing		Head up	Ears forwards	Eyes open	Tail in motion
PASTURE	1	1	afternoon	2018_07_24	1	12:45:42:17	12:45:43:16	Standing		Head up	Ears forwards	Eyes open	Tail in motion
PASTURE	1	1	afternoon	2018_07_24	1	12:45:43:17	12:45:44:16	Standing		Head up	Ears forwards	Eyes open	Tail in motion
PASTURE	1	1	afternoon	2018_07_24	1	12:45:44:17	12:45:45:16	Standing		Head up	Ears forwards	Eyes open	Tail in motion
PASTURE	1	1	afternoon	2018_07_24	1	12:45:45:17	12:45:46:16	Standing		Head up	Ears forwards	Eyes open	Tail in motion
PASTURE	1	1	afternoon	2018_07_24	1	12:45:46:17	12:45:47:16	Standing		Head up	Ears forwards	Eyes open	Tail in motion
PASTURE	1	1	afternoon	2018_07_24	1	12:45:47:17	12:45:48:16	Standing		Head up	Ears forwards	Eyes open	Tail in motion
PASTURE	1	1	afternoon	2018_07_24	1	12:45:48:17	12:45:49:16	Standing		Head up	Ears forwards	Eyes open	Tail in motion
PASTURE	1	1	afternoon	2018_07_24	1	12:45:49:17	12:45:50:16	Standing		Head up	Ears forwards	Eyes open	Tail in motion
PASTURE	1	1	afternoon	2018_07_24	1	12:45:50:17	12:45:51:16	Standing		Head up	Ears forwards	Eyes open	Tail in motion
PASTURE	1	1	afternoon	2018_07_24	1	12:45:51:17	12:45:52:16	Standing		Head up	Ears forwards	Eyes open	Tail in motion
PASTURE	1	1	afternoon	2018_07_24	1	12:45:52:17	12:45:53:16	Standing		Head up	Ears forwards	Eyes open	Tail in motion
PASTURE	1	1	afternoon	2018_07_24	1	12:45:53:17	12:45:54:16	Standing		Head up	Ears forwards	Eyes open	Tail in motion
PASTURE	1	1	afternoon	2018_07_24	1	12:45:54:17	12:45:55:16	Standing		Head up	Ears forwards	Eyes open	Tail in motion
PASTURE	1	1	afternoon	2018_07_24	1	12:45:55:17	12:45:56:16	Standing		Head up	Ears forwards	Eyes open	Tail in motion
PASTURE	1	1	afternoon	2018_07_24	1	12:45:56:17	12:45:57:16	Standing		Head up	Ears forwards	Eyes open	Tail in motion
PASTURE	1	1	afternoon	2018_07_24	1	12:45:57:17	12:45:58:16	Standing		Head up	Ears forwards	Eyes open	Tail in motion
PASTURE	1	1	afternoon	2018_07_24	1	12:45:58:17	12:45:59:16	Standing		Head up	Ears forwards	Eyes open	Tail in motion
PASTURE	1	1	afternoon	2018_07_24	1	12:45:59:17	12:46:00:16	Standing		Head up	Ears forwards	Eyes open	Tail in motion
PASTURE	1	1	afternoon	2018_07_24	1	12:46:00:17	12:46:01:16	Standing		Head up	Ears forwards	Eyes open	Tail in motion
PASTURE	1	1	afternoon	2018_07_24	1	12:46:01:17	12:46:02:16	Standing		Head up	Ears forwards	Eyes open	Tail in motion
PASTURE	1	1	afternoon	2018_07_24	1	12:46:02:17	12:46:03:16	Standing		Head up	Ears forwards	Eyes open	Tail in motion
PASTURE	1	1	afternoon	2018_07_24	1	12:46:03:17	12:46:04:16	Standing		Head up	Ears forwards	Eyes open	Tail in motion
PASTURE	1	1	afternoon	2018_07_24	1	12:46:04:17	12:46:05:16	Standing		Head up	Ears forwards	Eyes open	Tail in motion
PASTURE	1	1	afternoon	2018_07_24	1	12:46:05:17	12:46:06:16	Standing		Head up	Ears forwards	Eyes open	Tail in motion
PASTURE	1	1	afternoon	2018_07_24	1	12:46:06:17	12:46:07:16	Standing		Head up	Ears forwards	Eyes open	Tail in motion
PASTURE	1	1	afternoon	2018_07_24	1	12:46:07:17	12:46:08:16	Standing		Head up	Ears forwards	Eyes open	Tail in motion
PASTURE	1	1	afternoon	2018_07_24	1	12:46:08:17	12:46:09:16	Standing		Head up	Ears forwards	Eyes open	Tail in motion
PASTURE	1	1	afternoon	2018_07_24	1	12:46:09:17	12:46:10:16	Standing		Head up	Ears forwards	Eyes open	Tail in motion
PASTURE	1	1	afternoon	2018_07_24	1	12:46:10:17	12:46:11:16	Standing		Head up	Ears forwards	Eyes open	Tail in motion
PASTURE	1	1	afternoon	2018_07_24	1	12:46:11:17	12:46:12:16	Standing		Head up	Ears forwards	Eyes open	Tail in motion
PASTURE	1	1	afternoon	2018_07_24	1	12:46:12:17	12:46:13:16	Standing		Head up	Ears forwards	Eyes open	Tail in motion
PASTURE	1	1	afternoon	2018_07_24	1	12:46:13:17	12:46:14:16	Standing		Head up	Ears forwards	Eyes open	Tail in motion
PASTURE	1	1	afternoon	2018_07_24	1	12:46:14:17	12:46:15:16	Standing		Head up	Ears forwards	Eyes open	Tail in motion
PASTURE	1	1	afternoon	2018_07_24	1	12:46:15:17	12:46:16:16	Standing		Head up	Ears forwards	Eyes open	Tail in motion
PASTURE	1	1	afternoon	2018_07_24	1	12:46:16:17	12:46:17:16	Standing		Head up	Ears forwards	Eyes open	Tail in motion
PASTURE	1	1	afternoon	2018_07_24	1	12:46:17:17	12:46:18:16	Standing		Head up	Ears forwards	Eyes open	Tail in motion
PASTURE	1	1	afternoon	2018_07_24	1	12:46:18:17	12:46:19:16	Standing		Head up	Ears forwards	Eyes open	Tail in motion
PASTURE	1	1	afternoon	2018_07_24	1	12:46:19:17	12:46:20:16	Standing		Head up	Ears forwards	Eyes open	Tail in motion
PASTURE	1	1	afternoon	2018_07_24	1	12:46:20:17	12:46:21:16	Standing		Head up	Ears forwards	Eyes open	Tail in motion
PASTURE	1	1	afternoon	2018_07_24	1	12:46:21:17	12:46:22:16	Standing		Head up	Ears forwards	Eyes open	Tail in motion
PASTURE	1	1	afternoon	2018_07_24	1	12:46:22:17	12:46:23:16	Standing		Head up	Ears forwards	Eyes open	Tail in motion
PASTURE	1	1	afternoon	2018_07_24	1	12:46:23:17	12:46:24:16	Standing		Head up	Ears forwards	Eyes open	Tail in motion
PASTURE	1	1	afternoon	2018_07_24	1	12:46:24:17	12:46:25:16	Standing		Head up	Ears forwards	Eyes open	Tail in motion
PASTURE	1	1	afternoon	2018_07_24	1	12:46:25:17	12:46:26:16	Standing		Head up	Ears forwards	Eyes open	Tail in motion
PASTURE	1	1	afternoon	2018_07_24	1	12:46:26:17	12:46:27:16	Standing		Head up	Ears forwards	Eyes open	Tail in motion
PASTURE	1	1	afternoon	2018_07_24	1	12:46:27:17	12:46:28:16	Standing		Head up	Ears forwards	Eyes open	Tail in motion
PASTURE	1	1	afternoon	2018_07_24	1	12:46:28:17	12:46:29:16	Standing		Head up	Ears forwards	Eyes open	Tail in motion
PASTURE	1	1	afternoon	2018_07_24	1	12:46:29:17	12:46:30:16	Standing		Head up	Ears forwards	Eyes open	Tail in motion
PASTURE	1	1	afternoon	2018_07_24	1	12:46:30:17	12:46:31:16	Standing		Head up	Ears forwards	Eyes open	Tail in motion
PASTURE	1	1	afternoon	2018_07_24	1	12:46:31:17	12:46:32:16	Standing		Head up	Ears forwards	Eyes open	Tail in motion
PASTURE	1	1	afternoon	2018_07_24	1	12:46:32:17	12:46:33:16	Standing		Head up	Ears forwards	Eyes open	Tail in motion
PASTURE	1	1	afternoon	2018_07_24	1	12:46:58:17	12:46:59:16	Standing		Head up	Ears backwards	Eyes open	Tail hanging
PASTURE	1	1	afternoon	2018_07_24	1	12:46:59:17	12:47:00:16	Standing		Head up	Ears backwards	Eyes open	Tail hanging
PASTURE	1	1	afternoon	2018_07_24	1	12:47:00:17	12:47:01:16	Standing		Head up	Ears backwards	Eyes open	Tail hanging
PASTURE	1	1	afternoon	2018_07_24	1	12:47:01:17	12:47:02:16	Standing		Head up	Ears backwards	Eyes open	Tail hanging
PASTURE	1	1	afternoon	2018_07_24	1	12:47:02:17	12:47:03:16	Standing		Head up	Ears backwards	Eyes open	Tail hanging
PASTURE	1	1	afternoon	2018_07_24	1	12:47:03:17	12:47:04:16	Standing		Head up	Ears backwards	Eyes open	Tail hanging
PASTURE	1	1	afternoon	2018_07_24	1	12:47:04:17	12:47:05:16	Standing		Head up	Ears backwards	Eyes open	Tail in motion
PASTURE	1	1	afternoon	2018_07_24	1	12:47:05:17	12:47:06:16	Standing		Head up	Ears backwards	Eyes open	Tail in motion
PASTURE	1	1	afternoon	2018_07_24	1	12:47:06:17	12:47:07:16	Standing		Head up	Ears backwards	Eyes open	Tail in motion
PASTURE	1	1	afternoon	2018_07_24	1	12:47:07:17	12:47:08:16	Standing		Head up	Ears backwards	Eyes open	Tail in motion
PASTURE	1	1	afternoon	2018_07_24	1	12:47:08:17	12:47:09:16	Standing		Head up	Ears backwards	Eyes open	Tail in motion
PASTURE	1	1	afternoon	2018_07_24	1	12:47:09:17	12:47:10:16	Standing		Head up	Ears backwards	Eyes open	Tail in motion
PASTURE	1	1	afternoon	2018_07_24	1	12:47:10:17	12:47:11:16	Standing		Head up	Ears backwards	Eyes open	Tail in motion
PASTURE	1	1	afternoon	2018_07_24	1	12:47:11:17	12:47:12:16	Standing		Head up	Ears backwards	Eyes open	Tail in motion
PASTURE	1	1	afternoon	2018_07_24	1	12:47:12:17	12:47:13:16	Standing		Head up	Ears backwards	Eyes open	Tail in motion
PASTURE	1	1	afternoon	2018_07_24	1	12:47:13:17	12:47:14:16	Standing		Head up	Ears backwards	Eyes open	Tail in motion
PASTURE	1	1	afternoon	2018_07_24	1	12:47:14:17	12:47:15:16	Standing		Head up	Ears backwards	Eyes open	Tail in motion
PASTURE	1	1	afternoon	2018_07_24	1	12:47:15:17	12:47:16:16	Standing		Head up	Ears backwards	Eyes open	Tail in motion
PASTURE	1	1	afternoon	2018_07_24	1	12:47:16:17	12:47:17:16	Standing		Head up	Ears backwards	Eyes open	Tail in motion
PASTURE	1	1	afternoon	2018_07_24	1	12:47:17:17	12:47:18:16	Standing		Head up	Ears backwards	Eyes open	Tail in motion
PASTURE	1	1	afternoon	2018_07_24	1	12:47:18:17	12:47:19:16	Standing		Head up	Ears backwards	Eyes open	Tail in motion
PASTURE	1	1	afternoon	2018_07_24	1	12:47:19:17	12:47:20:16	Standing		Head up	Ears backwards	Eyes open	Tail in motion
PASTURE	1	1	afternoon	2018_07_24	1	12:47:20:17	12:47:21:16	Standing		Head up	Ears backwards	Eyes open	Tail in motion
PASTURE	1	1	afternoon	2018_07_24	1	12:47:21:17	12:47:22:16	Standing		Head up	Ears backwards	Eyes open	Tail in motion
PASTURE	1	1	afternoon	2018_07_24	1	12:47:22:17	12:47:23:16	Standing		Head up	Ears backwards	Eyes open	Tail in motion
PASTURE	1	1	afternoon	2018_07_24	1	12:47:23:17	12:47:24:16	Standing		Head up	Ears backwards	Eyes open	Tail in motion
PASTURE	1	1	afternoon	2018_07_24	1	12:47:24:17	12:47:25:16	Standing		Head up	Ears backwards	Eyes open	Tail in motion
PASTURE	1	1	afternoon	2018_07_24	1	12:47:25:17	12:47:26:16	Standing		Head up	Ears backwards	Eyes open	Tail in motion
PASTURE	1	1	afternoon	2018_07_24	1	12:47:26:17	12:47:27:16	Standing		Head up	Ears backwards	Eyes open	Tail in motion
PASTURE	1	1	afternoon	2018_07_24	1	12:47:27:17	12:47:28:16	Standing		Head up	Ears backwards	Eyes open	Tail in motion
PASTURE	1	1	afternoon	2018_07_24	1	12:47:28:17	12:47:29:16	Standing		Head down	Ears backwards	Eyes open	Tail in motion
PASTURE	1	1	afternoon	2018_07_24	1	12:47:29:17	12:47:30:16	Standing		Head down	Ears backwards	Eyes open	Tail in motion
PASTURE	1	1	afternoon	2018_07_24	1	12:47:30:17	12:47:31:16	Standing		Head down	Ears backwards	Eyes open	Tail in motion
PASTURE	1	1	afternoon	2018_07_24	1	12:47:31:17	12:47:32:16	Standing		Head down	Ears backwards	Eyes open	Tail in motion
PASTURE	1	1	afternoon	2018_07_24	1	12:47:32:17	12:47:33:16	Standing		Head down	Ears backwards	Eyes open	Tail in motion
PASTURE	1	1	afternoon	2018_07_24	1	12:47:33:17	12:47:34:16	Standing		Head down	Ears backwards	Eyes open	Tail in motion
PASTURE	1	1	afternoon	2018_07_24	1	12:47:34:17	12:47:35:16	Standing		Head down	Ears backwards	Eyes open	Tail in motion
PASTURE	1	1	afternoon	2018_07_24	1	12:47:35:17	12:47:36:16	Standing		Head down	Ears backwards	Eyes open	Tail in motion
PASTURE	1	1	afternoon	2018_07_24	1	12:47:36:17	12:47:37:16	Standing		Head up	Ears backwards	Eyes open	Tail in motion
PASTURE	1	1	afternoon	2018_07_24	1	12:47:37:17	12:47:38:16	Standing		Head up	Ears backwards	Eyes open	Tail in motion
PASTURE	1	1	afternoon	2018_07_24	1	12:47:38:17	12:47:39:16	Standing		Head up	Ears backwards	Eyes open	Tail in motion
PASTURE	1	1	afternoon	2018_07_24	1	12:47:39:17	12:47:40:16	Standing		Head up	Ears backwards	Eyes open	Tail in motion
PASTURE	1	1	afternoon	2018_07_24	1	12:47:40:17	12:47:41:16	Standing		Head up	Ears backwards	Eyes open	Tail in motion
PASTURE	1	1	afternoon	2018_07_24	1	12:47:41:17	12:47:42:16	Standing		Head up	Ears backwards	Eyes open	Tail in motion
PASTURE	1	1	afternoon	2018_07_24	1	12:47:42:17	12:47:43:16	Standing		Head up	Ears backwards	Eyes open	Tail in motion
PASTURE	1	1	afternoon	2018_07_24	1	12:47:43:17	12:47:44:16	Standing		Head up	Ears backwards	Eyes open	Tail in motion
PASTURE	1	1	afternoon	2018_07_24	1	12:47:44:17	12:47:45:16	Standing		Head up	Ears backwards	Eyes open	Tail in motion
PASTURE	1	1	afternoon	2018_07_24	1	12:47:45:17	12:47:46:16	Standing		Head up	Ears backwards	Eyes open	Tail in motion
PASTURE	1	1	afternoon	2018_07_24	1	12:47:46:17	12:47:47:16	Standing		Head up	Ears forwards	Eyes open	Tail in motion
PASTURE	1	1	afternoon	2018_07_24	1	12:47:47:17	12:47:48:16	Standing		Head up	Ears forwards	Eyes open	Tail in motion
PASTURE	1	1	afternoon	2018_07_24	1	12:47:48:17	12:47:49:16	Standing		Head up	Ears forwards	Eyes open	Tail in motion
PASTURE	1	1	afternoon	2018_07_24	1	12:47:49:17	12:47:50:16	Standing		Head up	Ears forwards	Eyes open	Tail in motion
PASTURE	1	1	afternoon	2018_07_24	1	12:47:50:17	12:47:51:16	Standing		Head up	Ears forwards	Eyes open	Tail in motion
PASTURE	1	1	afternoon	2018_07_24	1	12:47:51:17	12:47:52:16	Standing		Head up	Ears forwards	Eyes open	Tail in motion
PASTURE	1	1	afternoon	2018_07_24	1	12:47:52:17	12:47:53:16	Standing		Head up	Ears forwards	Eyes open	Tail in motion
PASTURE	1	1	afternoon	2018_07_24	1	12:47:53:17	12:47:54:16	Standing		Head up	Ears forwards	Eyes open	Tail in motion
PASTURE	1	1	afternoon	2018_07_24	1	12:47:54:17	12:47:55:16	Standing		Head up	Ears forwards	Eyes open	Tail in motion
PASTURE	1	1	afternoon	2018_07_24	1	12:47:55:17	12:47:56:16	Standing		Head up	Ears forwards	Eyes open	Tail in motion
PASTURE	1	1	afternoon	2018_07_24	1	12:47:56:17	12:47:57:16	Standing		Head up	Ears forwards	Eyes open	Tail in motion
PASTURE	1	1	afternoon	2018_07_24	1	12:47:57:17	12:47:58:16	Standing		Head up	Ears forwards	Eyes open	Tail in motion
PASTURE	1	1	afternoon	2018_07_24	1	12:47:58:17	12:47:59:16	Standing		Head up	Ears forwards	Eyes open	Tail in motion
PASTURE	1	1	afternoon	2018_07_24	1	12:47:59:17	12:48:00:16	Standing		Head up	Ears forwards	Eyes open	Tail in motion
PASTURE	1	1	afternoon	2018_07_24	1	12:48:00:17	12:48:01:16	Standing		Head up	Ears forwards	Eyes open	Tail in motion
PASTURE	1	1	afternoon	2018_07_24	1	12:48:01:17	12:48:02:16	Standing		Head up	Ears forwards	Eyes open	Tail in motion
PASTURE	1	1	afternoon	2018_07_24	1	12:48:02:17	12:48:03:16	Standing		Head up	Ears forwards	Eyes open	Tail in motion
PASTURE	1	1	afternoon	2018_07_24	1	12:48:03:17	12:48:04:16	Standing		Head up	Ears forwards	Eyes open	Tail in motion
PASTURE	1	1	afternoon	2018_07_24	1	12:48:04:17	12:48:05:16	Standing		Head up	Ears forwards	Eyes open	Tail in motion
PASTURE	1	1	afternoon	2018_07_24	1	12:48:05:17	12:48:06:16	Standing		Head up	Ears forwards	Eyes open	Tail in motion
PASTURE	1	1	afternoon	2018_07_24	1	12:48:06:17	12:48:07:16	Standing		Head up	Ears forwards	Eyes open	Tail in motion
PASTURE	1	1	afternoon	2018_07_24	1	12:48:07:17	12:48:08:16	Standing		Head up	Ears forwards	Eyes open	Tail in motion
PASTURE	1	1	afternoon	2018_07_24	1	12:48:08:17	12:48:09:16	Standing		Head up	Ears forwards	Eyes open	Tail in motion
PASTURE	1	1	afternoon	2018_07_24	1	12:48:09:17	12:48:10:16	Standing		Head up	Ears forwards	Eyes open	Tail in motion
PASTURE	1	1	afternoon	2018_07_24	1	12:48:10:17	12:48:11:16	Standing		Head up	Ears forwards	Eyes open	Tail in motion
PASTURE	1	1	afternoon	2018_07_24	1	12:48:58:17	12:48:59:16	Standing		Head up	Ears forwards	Eyes open	Tail hanging
PASTURE	1	1	afternoon	2018_07_24	1	12:48:59:17	12:49:00:16	Standing		Head up	Ears forwards	Eyes open	Tail hanging
PASTURE	1	1	afternoon	2018_07_24	1	12:49:00:17	12:49:01:16	Standing		Head up	Ears forwards	Eyes open	Tail hanging
PASTURE	1	1	afternoon	2018_07_24	1	12:49:01:17	12:49:02:16	Standing		Head up	Ears forwards	Eyes open	Tail hanging
PASTURE	1	1	afternoon	2018_07_24	1	12:49:02:17	12:49:03:16	Standing		Head up	Ears forwards	Eyes open	Tail hanging
PASTURE	1	1	afternoon	2018_07_24	1	12:49:03:17	12:49:04:16	Standing		Head up	Ears forwards	Eyes open	Tail hanging
PASTURE	1	1	afternoon	2018_07_24	1	12:49:04:17	12:49:05:16	Standing		Head up	Ears forwards	Eyes open	Tail hanging
PASTURE	1	1	afternoon	2018_07_24	1	12:49:05:17	12:49:06:16	Standing		Head up	Ears forwards	Eyes open	Tail hanging
PASTURE	1	1	afternoon	2018_07_24	1	12:49:06:17	12:49:07:16	Standing		Head up	Ears forwards	Eyes open	Tail hanging
PASTURE	1	1	afternoon	2018_07_24	1	12:49:07:17	12:49:08:16	Standing		Head up	Ears forwards	Eyes open	Tail hanging
PASTURE	1	1	afternoon	2018_07_24	1	12:49:08:17	12:49:09:16	Standing		Head up	Ears forwards	Eyes open	Tail hanging
PASTURE	1	1	afternoon	2018_07_24	1	12:49:09:17	12:49:10:16	Standing		Head up	Ears forwards	Eyes open	Tail in motion
PASTURE	1	1	afternoon	2018_07_24	1	12:49:10:17	12:49:11:16	Standing		Head up	Ears forwards	Eyes open	Tail in motion
PASTURE	1	1	afternoon	2018_07_24	1	12:49:11:17	12:49:12:16	Standing		Head up	Ears forwards	Eyes open	Tail in motion
PASTURE	1	1	afternoon	2018_07_24	1	12:49:12:17	12:49:13:16	Standing		Head up	Ears forwards	Eyes open	Tail in motion
PASTURE	1	1	afternoon	2018_07_24	1	12:49:13:17	12:49:14:16	Standing		Head up	Ears forwards	Eyes open	Tail in motion
PASTURE	1	1	afternoon	2018_07_24	1	12:49:14:17	12:49:15:16	Standing		Head up	Ears forwards	Eyes open	Tail in motion
PASTURE	1	1	afternoon	2018_07_24	1	12:49:15:17	12:49:16:16	Standing		Head up	Ears forwards	Eyes open	Tail in motion
PASTURE	1	1	afternoon	2018_07_24	1	12:49:16:17	12:49:17:16	Standing		Head up	Ears forwards	Eyes open	Tail in motion
PASTURE	1	1	afternoon	2018_07_24	1	12:49:17:17	12:49:18:16	Standing		Head up	Ears forwards	Eyes open	Tail in motion
PASTURE	1	1	afternoon	2018_07_24	1	12:49:18:17	12:49:19:16	Standing		Head up	Ears forwards	Eyes open	Tail in motion
PASTURE	1	1	afternoon	2018_07_24	1	12:49:19:17	12:49:20:16	Standing		Head up	Ears forwards	Eyes open	Tail in motion
PASTURE	1	1	afternoon	2018_07_24	1	12:49:20:17	12:49:21:16	Standing		Head up	Ears forwards	Eyes open	Tail in motion
PASTURE	1	1	afternoon	2018_07_24	1	12:49:21:17	12:49:22:16	Standing		Head up	Ears forwards	Eyes open	Tail in motion
PASTURE	1	1	afternoon	2018_07_24	1	12:49:22:17	12:49:23:16	Standing		Head up	Ears forwards	Eyes open	Tail in motion
PASTURE	1	1	afternoon	2018_07_24	1	12:49:23:17	12:49:24:16	Standing		Head up	Ears forwards	Eyes open	Tail in motion
PASTURE	1	1	afternoon	2018_07_24	1	12:49:24:17	12:49:25:16	Standing		Head up	Ears forwards	Eyes open	Tail in motion
PASTURE	1	1	afternoon	2018_07_24	1	12:49:25:17	12:49:26:16	Standing		Head up	Ears forwards	Eyes open	Tail in motion
PASTURE	1	1	afternoon	2018_07_24	1	12:49:26:17	12:49:27:16	Standing		Head up	Ears forwards	Eyes open	Tail in motion
PASTURE	1	1	afternoon	2018_07_24	1	12:49:27:17	12:49:28:16	Standing		Head up	Ears forwards	Eyes open	Tail in motion
PASTURE	1	1	afternoon	2018_07_24	1	12:49:28:17	12:49:29:16	Standing		Head up	Ears forwards	Eyes open	Tail in motion
PASTURE	1	1	afternoon	2018_07_24	1	12:49:29:17	12:49:30:16	Standing		Head up	Ears forwards	Eyes open	Tail in motion
PASTURE	1	1	afternoon	2018_07_24	1	12:49:30:17	12:49:31:16	Standing		Head up	Ears forwards	Eyes open	Tail in motion
PASTURE	1	1	afternoon	2018_07_24	1	12:49:31:17	12:49:32:16	Standing		Head up	Ears forwards	Eyes open	Tail in motion
PASTURE	1	1	afternoon	2018_07_24	1	12:49:32:17	12:49:33:16	Standing		Head up	Ears forwards	Eyes open	Tail in motion
PASTURE	1	1	afternoon	2018_07_24	1	12:49:33:17	12:49:34:16	Standing		Head up	Ears forwards	Eyes open	Tail in motion
PASTURE	1	1	afternoon	2018_07_24	1	12:49:34:17	12:49:35:16	Standing		Head up	Ears forwards	Eyes open	Tail in motion
PASTURE	1	1	afternoon	2018_07_24	1	12:49:35:17	12:49:36:16	Standing		Head up	Ears forwards	Eyes open	Tail in motion
PASTURE	1	1	afternoon	2018_07_24	1	12:49:36:17	12:49:37:16	Standing		Head up	Ears forwards	Eyes open	Tail in motion
PASTURE	1	1	afternoon	2018_07_24	1	12:49:37:17	12:49:38:16	Standing		Head up	Ears forwards	Eyes open	Tail in motion
PASTURE	1	1	afternoon	2018_07_24	1	12:49:38:17	12:49:39:16	Standing		Head up	Ears forwards	Eyes open	Tail in motion
PASTURE	1	1	afternoon	2018_07_24	1	12:49:39:17	12:49:40:16	Standing		Head up	Ears forwards	Eyes open	Tail in motion
PASTURE	1	1	afternoon	2018_07_24	1	12:49:40:17	12:49:41:16	Standing		Head up	Ears forwards	Eyes open	Tail in motion
PASTURE	1	1	afternoon	2018_07_24	1	12:49:41:17	12:49:42:16	Standing		Head up	Ears forwards	Eyes open	Tail in motion
PASTURE	1	1	afternoon	2018_07_24	1	12:49:42:17	12:49:43:16	Standing		Head up	Ears forwards	Eyes open	Tail in motion
PASTURE	1	1	afternoon	2018_07_24	1	12:49:43:17	12:49:44:16	Standing		Head up	Ears forwards	Eyes open	Tail in motion
PASTURE	1	1	afternoon	2018_07_24	1	12:49:44:17	12:49:45:16	Standing		Head up	Ears forwards	Eyes open	Tail in motion
PASTURE	1	1	afternoon	2018_07_24	1	12:49:45:17	12:49:46:16	Standing		Head up	Ears forwards	Eyes open	Tail in motion
PASTURE	1	1	afternoon	2018_07_24	1	12:49:46:17	12:49:47:16	Standing		Head up	Ears forwards	Eyes open	Tail in motion
PASTURE	1	1	afternoon	2018_07_24	1	12:49:47:17	12:49:48:16	Standing		Head up	Ears forwards	Eyes open	Tail in motion
PASTURE	1	1	afternoon	2018_07_24	1	12:49:48:17	12:49:49:16	Standing		Head up	Ears forwards	Eyes open	Tail in motion
PASTURE	1	1	afternoon	2018_07_24	1	12:49:49:17	12:49:50:16	Standing		Head up	Ears forwards	Eyes open	Tail in motion
PASTURE	1	1	afternoon	2018_07_24	1	12:49:50:17	12:49:51:16	Standing		Head up	Ears forwards	Eyes open	Tail in motion
PASTURE	1	1	afternoon	2018_07_24	1	12:49:51:17	12:49:52:16	Standing		Head up	Ears forwards	Eyes open	Tail in motion
PASTURE	1	1	afternoon	2018_07_24	1	12:49:52:17	12:49:53:16	Standing		Head up	Ears forwards	Eyes open	Tail in motion
PASTURE	1	1	afternoon	2018_07_24	1	12:49:53:17	12:49:54:16	Standing		Head up	Ears forwards	Eyes open	Tail in motion
PASTURE	1	1	afternoon	2018_07_24	1	12:49:54:17	12:49:55:16	Standing		Head up	Ears forwards	Eyes open	Tail in motion
PASTURE	1	1	afternoon	2018_07_24	1	12:49:55:17	12:49:56:16	Standing		Head up	Ears forwards	Eyes open	Tail in motion
PASTURE	1	1	afternoon	2018_07_24	1	12:49:56:17	12:49:57:16	Standing		Head up	Ears forwards	Eyes open	Tail in motion
PASTURE	1	1	afternoon	2018_07_24	1	12:49:57:17	12:49:58:16	Standing		Head up	Ears forwards	Eyes open	Tail in motion
PASTURE	1	1	afternoon	2018_07_24	1	12:49:58:17	12:49:59:16	Standing		Head up	Ears forwards	Eyes open	Tail in motion
PASTURE	1	1	afternoon	2018_07_24	1	12:49:59:17	12:50:00:16	Standing		Head up	Ears forwards	Eyes open	Tail in motion
PASTURE	1	1	afternoon	2018_07_24	1	12:50:00:17	12:50:01:16	Standing		Head up	Ears forwards	Eyes open	Tail in motion
PASTURE	1	1	afternoon	2018_07_24	1	12:50:01:17	12:50:02:16	Standing		Head up	Ears forwards	Eyes open	Tail in motion
PASTURE	1	1	afternoon	2018_07_24	1	12:50:02:17	12:50:03:16	Standing		Head up	Ears forwards	Eyes open	Tail in motion
PASTURE	1	1	afternoon	2018_07_24	1	12:50:03:17	12:50:04:16	Standing		Head up	Ears forwards	Eyes open	Tail in motion
PASTURE	1	1	afternoon	2018_07_24	1	12:50:04:17	12:50:05:16	Standing		Head up	Ears forwards	Eyes open	Tail in motion
PASTURE	1	1	afternoon	2018_07_24	1	12:50:05:17	12:50:06:16	Standing		Head up	Ears forwards	Eyes open	Tail in motion
PASTURE	1	1	afternoon	2018_07_24	1	12:50:06:17	12:50:07:16	Standing		Head up	Ears forwards	Eyes open	Tail in motion
PASTURE	1	1	afternoon	2018_07_24	1	12:50:07:17	12:50:08:16	Standing		Head up	Ears forwards	Eyes open	Tail in motion
PASTURE	1	1	afternoon	2018_07_24	1	12:50:08:17	12:50:09:16	Standing		Head up	Ears forwards	Eyes open	Tail in motion
PASTURE	1	1	afternoon	2018_07_24	1	12:50:09:17	12:50:10:16	Standing		Head up	Ears forwards	Eyes open	Tail in motion
PASTURE	1	1	afternoon	2018_07_24	1	12:50:10:17	12:50:11:16	Standing		Head up	Ears forwards	Eyes open	Tail in motion
PASTURE	1	1	afternoon	2018_07_24	1	12:50:11:17	12:50:12:16	Standing		Head up	Ears forwards	Eyes open	Tail in motion
PASTURE	1	1	afternoon	2018_07_24	1	12:50:12:17	12:50:13:16	Standing		Head up	Ears forwards	Eyes open	Tail in motion
PASTURE	1	1	afternoon	2018_07_24	1	12:50:13:17	12:50:14:16	Standing		Head up	Ears forwards	Eyes open	Tail in motion
PASTURE	1	1	afternoon	2018_07_24	1	12:50:14:17	12:50:15:16	Standing		Head up	Ears forwards	Eyes open	Tail in motion
PASTURE	1	1	afternoon	2018_07_24	1	12:50:15:17	12:50:16:16	Standing		Head up	Ears forwards	Eyes open	Tail in motion
PASTURE	1	1	afternoon	2018_07_24	1	12:50:16:17	12:50:17:16	Standing		Head up	Ears forwards	Eyes open	Tail in motion
PASTURE	1	1	afternoon	2018_07_24	1	12:50:17:17	12:50:18:16	Standing		Head up	Ears forwards	Eyes open	Tail in motion
PASTURE	1	1	afternoon	2018_07_24	1	12:50:18:17	12:50:19:16	Standing		Head up	Ears forwards	Eyes open	Tail in motion
PASTURE	1	1	afternoon	2018_07_24	1	12:50:19:17	12:50:20:16	Standing		Head up	Ears forwards	Eyes open	Tail in motion
PASTURE	1	1	afternoon	2018_07_24	1	12:50:20:17	12:50:21:16	Standing		Head up	Ears forwards	Eyes open	Tail in motion
PASTURE	1	1	afternoon	2018_07_24	1	12:50:21:17	12:50:22:16	Standing		Head up	Ears forwards	Eyes open	Tail in motion
PASTURE	1	1	afternoon	2018_07_24	1	12:50:22:17	12:50:23:16	Standing		Head up	Ears forwards	Eyes open	Tail in motion
PASTURE	1	1	afternoon	2018_07_24	1	12:50:23:17	12:50:24:16	Standing		Head up	Ears forwards	Eyes open	Tail in motion
PASTURE	1	1	afternoon	2018_07_24	1	12:50:24:17	12:50:25:16	Standing		Head up	Ears forwards	Eyes open	Tail in motion
PASTURE	1	1	afternoon	2018_07_24	1	12:50:25:17	12:50:26:16	Standing		Head up	Ears forwards	Eyes open	Tail in motion
PASTURE	1	1	afternoon	2018_07_24	1	12:50:26:17	12:50:27:16	Standing		Head up	Ears forwards	Eyes open	Tail in motion
PASTURE	1	1	afternoon	2018_07_24	1	12:50:27:17	12:50:28:16	Standing		Head up	Ears forwards	Eyes open	Tail in motion
PASTURE	1	1	afternoon	2018_07_24	1	12:50:28:17	12:50:29:16	Standing		Head up	Ears forwards	Eyes open	Tail in motion
PASTURE	1	1	afternoon	2018_07_24	1	12:50:29:17	12:50:30:16	Standing		Head up	Ears forwards	Eyes open	Tail in motion
PASTURE	1	1	afternoon	2018_07_24	1	12:50:30:17	12:50:31:16	Standing		Head up	Ears forwards	Eyes open	Tail in motion
PASTURE	1	1	afternoon	2018_07_24	1	12:50:31:17	12:50:32:16	Standing		Head up	Ears forwards	Eyes open	Tail in motion
PASTURE	1	1	afternoon	2018_07_24	1	12:50:32:17	12:50:33:16	Standing		Head up	Ears forwards	Eyes open	Tail in motion
PASTURE	1	1	afternoon	2018_07_24	1	12:50:33:17	12:50:34:16	Standing		Head up	Ears forwards	Eyes open	Tail in motion
PASTURE	1	1	afternoon	2018_07_24	1	12:50:34:17	12:50:35:16	Standing		Head up	Ears forwards	Eyes open	Tail in motion
PASTURE	1	1	afternoon	2018_07_24	1	12:50:35:17	12:50:36:16	Standing		Head up	Ears forwards	Eyes open	Tail in motion
PASTURE	1	1	afternoon	2018_07_24	1	12:50:36:17	12:50:37:16	Standing		Head up	Ears forwards	Eyes open	Tail in motion
PASTURE	1	1	afternoon	2018_07_24	1	12:50:37:17	12:50:38:16	Standing		Head up	Ears forwards	Eyes open	Tail in motion
PASTURE	1	1	afternoon	2018_07_24	1	12:50:38:17	12:50:39:16	Standing		Head up	Ears forwards	Eyes open	Tail in motion
PASTURE	1	1	afternoon	2018_07_24	1	12:50:39:17	12:50:40:16	Standing		Head up	Ears forwards	Eyes open	Tail in motion
PASTURE	1	1	afternoon	2018_07_24	1	12:50:40:17	12:50:41:16	Standing		Head up	Ears forwards	Eyes open	Tail in motion
PASTURE	1	1	afternoon	2018_07_24	1	12:50:41:17	12:50:42:16	Standing		Head up	Ears forwards	Eyes open	Tail in motion
PASTURE	1	1	afternoon	2018_07_24	1	12:50:42:17	12:50:43:16	Standing		Head up	Ears forwards	Eyes open	Tail in motion
PASTURE	1	1	afternoon	2018_07_24	1	12:50:43:17	12:50:44:16	Standing		Head up	Ears forwards	Eyes open	Tail in motion
PASTURE	1	1	afternoon	2018_07_24	1	12:50:44:17	12:50:45:16	Standing		Head up	Ears forwards	Eyes open	Tail in motion
PASTURE	1	1	afternoon	2018_07_24	1	12:50:45:17	12:50:46:16	Standing		Head up	Ears forwards	Eyes open	Tail in motion
PASTURE	1	1	afternoon	2018_07_24	1	12:50:46:17	12:50:47:16	Standing		Head up	Ears forwards	Eyes open	Tail in motion
PASTURE	1	1	afternoon	2018_07_24	1	12:50:47:17	12:50:48:16	Standing		Head up	Ears forwards	Eyes open	Tail in motion
PASTURE	1	1	afternoon	2018_07_24	1	12:50:48:17	12:50:49:16	Standing		Head up	Ears forwards	Eyes open	Tail in motion
PASTURE	1	1	afternoon	2018_07_24	1	12:50:49:17	12:50:50:16	Standing		Head up	Ears forwards	Eyes open	Tail in motion
PASTURE	1	1	afternoon	2018_07_24	1	12:50:50:17	12:50:51:16	Standing		Head up	Ears forwards	Eyes open	Tail in motion
PASTURE	1	1	afternoon	2018_07_24	1	12:50:51:17	12:50:52:16	Standing		Head up	Ears forwards	Eyes open	Tail in motion
PASTURE	1	1	afternoon	2018_07_24	1	12:50:52:17	12:50:53:16	Standing		Head up	Ears forwards	Eyes open	Tail in motion
PASTURE	1	1	afternoon	2018_07_24	1	12:50:53:17	12:50:54:16	Standing		Head up	Ears forwards	Eyes open	Tail in motion
PASTURE	1	1	afternoon	2018_07_24	1	12:50:54:17	12:50:55:16	Standing		Head up	Ears forwards	Eyes open	Tail in motion
PASTURE	1	1	afternoon	2018_07_24	1	12:50:55:17	12:50:56:16	Standing		Head up	Ears forwards	Eyes open	Tail in motion
PASTURE	1	1	afternoon	2018_07_24	1	12:50:56:17	12:50:57:16	Standing		Head up	Ears forwards	Eyes open	Tail in motion
PASTURE	1	1	afternoon	2018_07_24	1	12:50:57:17	12:50:58:16	Standing		Head up	Ears forwards	Eyes open	Tail in motion
PASTURE	1	1	afternoon	2018_07_24	1	12:50:58:17	12:50:59:16	Standing		Head up	Ears forwards	Eyes open	Tail in motion
PASTURE	1	1	afternoon	2018_07_24	1	12:50:59:17	12:51:00:16	Standing		Head up	Ears forwards	Eyes open	Tail in motion
PASTURE	1	1	afternoon	2018_07_24	1	12:51:00:17	12:51:01:16	Standing		Head up	Ears forwards	Eyes open	Tail in motion
PASTURE	1	1	afternoon	2018_07_24	1	12:51:01:17	12:51:02:16	Standing		Head up	Ears forwards	Eyes open	Tail in motion
PASTURE	1	1	afternoon	2018_07_24	1	12:51:02:17	12:51:03:16	Standing		Head up	Ears forwards	Eyes open	Tail in motion
PASTURE	1	1	afternoon	2018_07_24	1	12:51:03:17	12:51:04:16	Standing		Head up	Ears forwards	Eyes open	Tail in motion
PASTURE	1	1	afternoon	2018_07_24	1	12:51:04:17	12:51:05:16	Standing		Head up	Ears forwards	Eyes open	Tail in motion
PASTURE	1	1	afternoon	2018_07_24	1	12:51:05:17	12:51:06:16	Standing		Head up	Ears forwards	Eyes open	Tail in motion
PASTURE	1	1	afternoon	2018_07_24	1	12:51:06:17	12:51:07:16	Standing		Head up	Ears forwards	Eyes open	Tail in motion
PASTURE	1	1	afternoon	2018_07_24	1	12:51:07:17	12:51:08:16	Standing		Head up	Ears forwards	Eyes open	Tail in motion
PASTURE	1	1	afternoon	2018_07_24	1	12:51:08:17	12:51:09:16	Standing		Head up	Ears forwards	Eyes open	Tail in motion
PASTURE	1	1	afternoon	2018_07_24	1	12:51:09:17	12:51:10:16	Standing		Head up	Ears forwards	Eyes open	Tail in motion
PASTURE	1	1	afternoon	2018_07_24	1	12:51:10:17	12:51:11:16	Standing		Head up	Ears forwards	Eyes open	Tail in motion
PASTURE	1	1	afternoon	2018_07_24	1	12:51:11:17	12:51:12:16	Standing		Head up	Ears forwards	Eyes open	Tail in motion
PASTURE	1	1	afternoon	2018_07_24	1	12:51:12:17	12:51:13:16	Standing		Head up	Ears forwards	Eyes open	Tail in motion
PASTURE	1	1	afternoon	2018_07_24	1	12:51:13:17	12:51:14:16	Standing		Head up	Ears forwards	Eyes open	Tail in motion
PASTURE	1	1	afternoon	2018_07_24	1	12:51:14:17	12:51:15:16	Standing		Head up	Ears forwards	Eyes open	Tail in motion
PASTURE	1	1	afternoon	2018_07_24	1	12:51:15:17	12:51:16:16	Standing		Head up	Ears forwards	Eyes open	Tail in motion
PASTURE	1	1	afternoon	2018_07_24	1	12:51:16:17	12:51:17:16	Standing		Head up	Ears forwards	Eyes open	Tail in motion
PASTURE	1	1	afternoon	2018_07_24	1	12:51:17:17	12:51:18:16	Standing		Head up	Ears forwards	Eyes open	Tail in motion
PASTURE	1	1	afternoon	2018_07_24	1	12:51:18:17	12:51:19:16	Standing		Head up	Ears forwards	Eyes open	Tail in motion
PASTURE	1	1	afternoon	2018_07_24	1	12:51:19:17	12:51:20:16	Standing		Head up	Ears forwards	Eyes open	Tail in motion
PASTURE	1	1	afternoon	2018_07_24	1	12:51:20:17	12:51:21:16	Standing		Head up	Ears forwards	Eyes open	Tail in motion
PASTURE	1	1	afternoon	2018_07_24	1	12:51:21:17	12:51:22:16	Standing		Head up	Ears forwards	Eyes open	Tail in motion
PASTURE	1	1	afternoon	2018_07_24	1	12:51:22:17	12:51:23:16	Standing		Head up	Ears forwards	Eyes open	Tail in motion
PASTURE	1	1	afternoon	2018_07_24	1	12:51:23:17	12:51:24:16	Standing		Head up	Ears forwards	Eyes open	Tail in motion
PASTURE	1	1	afternoon	2018_07_24	1	12:51:24:17	12:51:25:16	Standing		Head up	Ears forwards	Eyes open	Tail in motion
PASTURE	1	1	afternoon	2018_07_24	1	12:51:25:17	12:51:26:16	Standing		Head up	Ears forwards	Eyes open	Tail in motion
PASTURE	1	1	afternoon	2018_07_24	1	12:51:26:17	12:51:27:16	Standing		Head up	Ears forwards	Eyes open	Tail in motion
PASTURE	1	1	afternoon	2018_07_24	1	12:51:27:17	12:51:28:16	Standing		Head up	Ears forwards	Eyes open	Tail in motion
PASTURE	1	1	afternoon	2018_07_24	1	12:51:28:17	12:51:29:16	Standing		Head up	Ears forwards	Eyes open	Tail in motion
PASTURE	1	1	afternoon	2018_07_24	1	12:51:29:17	12:51:30:16	Standing		Head up	Ears forwards	Eyes open	Tail in motion
PASTURE	1	1	afternoon	2018_07_24	1	12:51:30:17	12:51:31:16	Standing		Head up	Ears forwards	Eyes open	Tail in motion
PASTURE	1	1	afternoon	2018_07_24	1	12:51:31:17	12:51:32:16	Standing		Head up	Ears forwards	Eyes open	Tail in motion
PASTURE	1	1	afternoon	2018_07_24	1	12:51:32:17	12:51:33:16	Standing		Head up	Ears forwards	Eyes open	Tail in motion
PASTURE	1	1	afternoon	2018_07_24	1	12:51:33:17	12:51:34:16	Standing		Head up	Ears forwards	Eyes open	Tail in motion
PASTURE	1	1	afternoon	2018_07_24	1	12:51:34:17	12:51:35:16	Standing		Head up	Ears forwards	Eyes open	Tail in motion
PASTURE	1	1	afternoon	2018_07_24	1	12:51:35:17	12:51:36:16	Standing		Head up	Ears forwards	Eyes open	Tail in motion
PASTURE	1	1	afternoon	2018_07_24	1	12:51:36:17	12:51:37:16	Standing		Head up	Ears forwards	Eyes open	Tail in motion
PASTURE	1	1	afternoon	2018_07_24	1	12:51:37:17	12:51:38:16	Standing		Head up	Ears forwards	Eyes open	Tail in motion
PASTURE	1	1	afternoon	2018_07_24	1	12:51:38:17	12:51:39:16	Standing		Head up	Ears forwards	Eyes open	Tail in motion
PASTURE	1	1	afternoon	2018_07_24	1	12:51:39:17	12:51:40:16	Standing		Head up	Ears forwards	Eyes open	Tail in motion
PASTURE	1	1	afternoon	2018_07_24	1	12:51:40:17	12:51:41:16	Standing		Head up	Ears forwards	Eyes open	Tail in motion
PASTURE	1	1	afternoon	2018_07_24	1	12:51:41:17	12:51:42:16	Standing		Head up	Ears forwards	Eyes open	Tail in motion
PASTURE	1	1	afternoon	2018_07_24	1	12:51:42:17	12:51:43:16	Standing		Head up	Ears forwards	Eyes open	Tail in motion
PASTURE	1	1	afternoon	2018_07_24	1	12:51:43:17	12:51:44:16	Standing		Head up	Ears forwards	Eyes open	Tail in motion
PASTURE	1	1	afternoon	2018_07_24	1	12:51:44:17	12:51:45:16	Standing		Head up	Ears forwards	Eyes open	Tail in motion
PASTURE	1	1	afternoon	2018_07_24	1	12:51:45:17	12:51:46:16	Standing		Head up	Ears forwards	Eyes open	Tail in motion
PASTURE	1	1	afternoon	2018_07_24	1	12:51:46:17	12:51:47:16	Standing		Head up	Ears forwards	Eyes open	Tail in motion
PASTURE	1	1	afternoon	2018_07_24	1	12:51:47:17	12:51:48:16	Standing		Head up	Ears forwards	Eyes open	Tail in motion
PASTURE	1	1	afternoon	2018_07_24	1	12:51:48:17	12:51:49:16	Standing		Head up	Ears forwards	Eyes open	Tail in motion
PASTURE	1	1	afternoon	2018_07_24	1	12:51:49:17	12:51:50:16	Standing		Head up	Ears forwards	Eyes open	Tail in motion
PASTURE	1	1	afternoon	2018_07_24	1	12:51:50:17	12:51:51:16	Standing		Head up	Ears forwards	Eyes open	Tail in motion
PASTURE	1	1	afternoon	2018_07_24	1	12:51:51:17	12:51:52:16	Standing		Head up	Ears forwards	Eyes open	Tail in motion
PASTURE	1	1	afternoon	2018_07_24	1	12:51:52:17	12:51:53:16	Standing		Head up	Ears forwards	Eyes open	Tail in motion
PASTURE	1	1	afternoon	2018_07_24	1	12:51:53:17	12:51:54:16	Standing		Head up	Ears forwards	Eyes open	Tail in motion
PASTURE	1	1	afternoon	2018_07_24	1	12:53:16:17	12:53:17:16	Standing		Head down	Ears forwards	Eyes open	Tail in motion
PASTURE	1	1	afternoon	2018_07_24	1	12:53:17:17	12:53:18:16	Standing		Head down	Ears forwards	Eyes open	Tail in motion
PASTURE	1	1	afternoon	2018_07_24	1	12:53:18:17	12:53:19:16	Standing		Head down	Ears forwards	Eyes open	Tail in motion
PASTURE	1	1	afternoon	2018_07_24	1	12:53:19:17	12:53:20:16	Standing		Head down	Ears forwards	Eyes open	Tail in motion
PASTURE	1	1	afternoon	2018_07_24	1	12:53:20:17	12:53:21:16	Standing		Head down	Ears forwards	Eyes open	Tail in motion
PASTURE	1	1	afternoon	2018_07_24	1	12:53:21:17	12:53:22:16	Standing		Head down	Ears forwards	Eyes open	Tail in motion
PASTURE	1	1	afternoon	2018_07_24	1	12:53:22:17	12:53:23:16	Standing		Head down	Ears forwards	Eyes open	Tail in motion
PASTURE	1	1	afternoon	2018_07_24	1	12:53:23:17	12:53:24:16	Standing		Head down	Ears forwards	Eyes open	Tail in motion
PASTURE	1	1	afternoon	2018_07_24	1	12:53:24:17	12:53:25:16	Standing		Head down	Ears forwards	Eyes open	Tail in motion
PASTURE	1	1	afternoon	2018_07_24	1	12:53:25:17	12:53:26:16	Standing		Head down	Ears forwards	Eyes open	Tail in motion
PASTURE	1	1	afternoon	2018_07_24	1	12:53:26:17	12:53:27:16	Standing		Head down	Ears forwards	Eyes open	Tail in motion
PASTURE	1	1	afternoon	2018_07_24	1	12:53:27:17	12:53:28:16	Standing		Head down	Ears forwards	Eyes open	Tail in motion
PASTURE	1	1	afternoon	2018_07_24	1	12:53:28:17	12:53:29:16	Standing		Head down	Ears forwards	Eyes open	Tail in motion
PASTURE	1	1	afternoon	2018_07_24	2	12:56:25:17	12:56:26:16	Standing		Head up	Ears forwards	Eyes open	Tail hanging
PASTURE	1	1	afternoon	2018_07_24	2	12:56:26:17	12:56:27:16	Standing		Head up	Ears forwards	Eyes open	Tail hanging
PASTURE	1	1	afternoon	2018_07_24	2	12:56:27:17	12:56:28:16	Standing		Head up	Ears forwards	Eyes open	Tail hanging
PASTURE	1	1	afternoon	2018_07_24	2	12:56:28:17	12:56:29:16	Standing		Head up	Ears forwards	Eyes open	Tail hanging
PASTURE	1	1	afternoon	2018_07_24	2	12:56:29:17	12:56:30:16	Standing		Head up	Ears forwards	Eyes open	Tail hanging
PASTURE	1	1	afternoon	2018_07_24	2	12:56:30:17	12:56:31:16	Standing		Head up	Ears forwards	Eyes open	Tail hanging
PASTURE	1	1	afternoon	2018_07_24	2	12:56:31:17	12:56:32:16	Standing		Head up	Ears forwards	Eyes open	Tail hanging
PASTURE	1	1	afternoon	2018_07_24	2	12:56:32:17	12:56:33:16	Standing		Head up	Ears forwards	Eyes open	Tail hanging
PASTURE	1	1	afternoon	2018_07_24	2	12:56:33:17	12:56:34:16	Standing		Head up	Ears forwards	Eyes open	Tail in motion
PASTURE	1	1	afternoon	2018_07_24	2	12:56:34:17	12:56:35:16	Standing		Head up	Ears forwards	Eyes open	Tail in motion
PASTURE	1	1	afternoon	2018_07_24	2	12:56:35:17	12:56:36:16	Standing		Head up	Ears forwards	Eyes open	Tail in motion
PASTURE	1	1	afternoon	2018_07_24	2	12:56:36:17	12:56:37:16	Standing		Head up	Ears forwards	Eyes open	Tail in motion
PASTURE	1	1	afternoon	2018_07_24	2	12:56:37:17	12:56:38:16	Standing		Head up	Ears forwards	Eyes open	Tail in motion
PASTURE	1	1	afternoon	2018_07_24	2	12:56:38:17	12:56:39:16	Standing		Head up	Ears forwards	Eyes open	Tail in motion
PASTURE	1	1	afternoon	2018_07_24	2	12:56:39:17	12:56:40:16	Standing		Head up	Ears forwards	Eyes open	Tail in motion
PASTURE	1	1	afternoon	2018_07_24	2	12:56:40:17	12:56:41:16	Standing		Head up	Ears forwards	Eyes open	Tail in motion
PASTURE	1	1	afternoon	2018_07_24	2	12:56:41:17	12:56:42:16	Standing		Head up	Ears forwards	Eyes open	Tail in motion
PASTURE	1	1	afternoon	2018_07_24	2	12:56:42:17	12:56:43:16	Standing		Head up	Ears forwards	Eyes open	Tail in motion
PASTURE	1	1	afternoon	2018_07_24	2	12:56:43:17	12:56:44:16	Standing		Head up	Ears forwards	Eyes open	Tail in motion
PASTURE	1	1	afternoon	2018_07_24	2	12:56:44:17	12:56:45:16	Standing		Head up	Ears forwards	Eyes open	Tail in motion
PASTURE	1	1	afternoon	2018_07_24	2	12:56:45:17	12:56:46:16	Standing		Head up	Ears forwards	Eyes open	Tail in motion
PASTURE	1	1	afternoon	2018_07_24	2	12:56:46:17	12:56:47:16	Standing		Head up	Ears forwards	Eyes open	Tail in motion
PASTURE	1	1	afternoon	2018_07_24	2	12:56:47:17	12:56:48:16	Standing		Head up	Ears forwards	Eyes open	Tail in motion
PASTURE	1	1	afternoon	2018_07_24	2	12:56:48:17	12:56:49:16	Standing		Head up	Ears forwards	Eyes open	Tail in motion
PASTURE	1	1	afternoon	2018_07_24	2	12:56:49:17	12:56:50:16	Standing		Head up	Ears forwards	Eyes open	Tail in motion
PASTURE	1	1	afternoon	2018_07_24	2	12:56:50:17	12:56:51:16	Standing		Head up	Ears forwards	Eyes open	Tail in motion
PASTURE	1	1	afternoon	2018_07_24	2	12:56:51:17	12:56:52:16	Standing		Head up	Ears forwards	Eyes open	Tail in motion
PASTURE	1	1	afternoon	2018_07_24	2	12:56:52:17	12:56:53:16	Standing		Head up	Ears forwards	Eyes open	Tail in motion
PASTURE	1	1	afternoon	2018_07_24	2	12:56:53:17	12:56:54:16	Standing		Head up	Ears forwards	Eyes open	Tail in motion
PASTURE	1	1	afternoon	2018_07_24	2	12:56:54:17	12:56:55:16	Standing		Head up	Ears forwards	Eyes open	Tail in motion
PASTURE	1	1	afternoon	2018_07_24	2	12:56:55:17	12:56:56:16	Standing		Head up	Ears forwards	Eyes open	Tail in motion
PASTURE	1	1	afternoon	2018_07_24	2	12:56:56:17	12:56:57:16	Standing		Head up	Ears forwards	Eyes open	Tail in motion
PASTURE	1	1	afternoon	2018_07_24	2	12:56:57:17	12:56:58:16	Standing		Head up	Ears forwards	Eyes open	Tail in motion
PASTURE	1	1	afternoon	2018_07_24	2	12:56:58:17	12:56:59:16	Standing		Head up	Ears forwards	Eyes open	Tail in motion
PASTURE	1	1	afternoon	2018_07_24	2	12:56:59:17	12:57:00:16	Standing		Head up	Ears forwards	Eyes open	Tail in motion
PASTURE	1	1	afternoon	2018_07_24	2	12:57:00:17	12:57:01:16	Standing		Head up	Ears forwards	Eyes open	Tail in motion
PASTURE	1	1	afternoon	2018_07_24	2	12:57:01:17	12:57:02:16	Standing		Head up	Ears forwards	Eyes open	Tail in motion
PASTURE	1	1	afternoon	2018_07_24	2	12:57:02:17	12:57:03:16	Standing		Head up	Ears forwards	Eyes open	Tail in motion
PASTURE	1	1	afternoon	2018_07_24	2	12:57:03:17	12:57:04:16	Standing		Head up	Ears forwards	Eyes open	Tail in motion
PASTURE	1	1	afternoon	2018_07_24	2	12:57:04:17	12:57:05:16	Standing		Head up	Ears forwards	Eyes open	Tail in motion
PASTURE	1	1	afternoon	2018_07_24	2	12:57:05:17	12:57:06:16	Standing		Head up	Ears forwards	Eyes open	Tail in motion
PASTURE	1	1	afternoon	2018_07_24	2	12:57:06:17	12:57:07:16	Standing		Head up	Ears forwards	Eyes open	Tail in motion
PASTURE	1	1	afternoon	2018_07_24	2	12:57:07:17	12:57:08:16	Standing		Head up	Ears forwards	Eyes open	Tail in motion
PASTURE	1	1	afternoon	2018_07_24	2	12:57:08:17	12:57:09:16	Standing		Head up	Ears forwards	Eyes open	Tail in motion
PASTURE	1	1	afternoon	2018_07_24	2	12:57:09:17	12:57:10:16	Standing		Head up	Ears forwards	Eyes open	Tail in motion
PASTURE	1	1	afternoon	2018_07_24	2	12:57:10:17	12:57:11:16	Standing		Head up	Ears forwards	Eyes open	Tail in motion
PASTURE	1	1	afternoon	2018_07_24	2	12:57:11:17	12:57:12:16	Standing		Head up	Ears forwards	Eyes open	Tail in motion
PASTURE	1	1	afternoon	2018_07_24	2	12:57:12:17	12:57:13:16	Standing		Head up	Ears forwards	Eyes open	Tail in motion
PASTURE	1	1	afternoon	2018_07_24	2	12:57:13:17	12:57:14:16	Standing		Head up	Ears forwards	Eyes open	Tail in motion
PASTURE	1	1	afternoon	2018_07_24	2	12:57:14:17	12:57:15:16	Standing		Head up	Ears forwards	Eyes open	Tail in motion
PASTURE	1	1	afternoon	2018_07_24	2	12:57:15:17	12:57:16:16	Standing		Head up	Ears forwards	Eyes open	Tail in motion
PASTURE	1	1	afternoon	2018_07_24	2	12:57:16:17	12:57:17:16	Standing		Head up	Ears forwards	Eyes open	Tail in motion
PASTURE	1	1	afternoon	2018_07_24	2	12:57:17:17	12:57:18:16	Standing		Head up	Ears forwards	Eyes open	Tail in motion
PASTURE	1	1	afternoon	2018_07_24	2	12:57:18:17	12:57:19:16	Standing		Head up	Ears forwards	Eyes open	Tail in motion
PASTURE	1	1	afternoon	2018_07_24	2	12:57:19:17	12:57:20:16	Standing		Head up	Ears forwards	Eyes open	Tail in motion
PASTURE	1	1	afternoon	2018_07_24	2	12:57:20:17	12:57:21:16	Standing		Head up	Ears forwards	Eyes open	Tail in motion
PASTURE	1	1	afternoon	2018_07_24	2	12:57:21:17	12:57:22:16	Standing		Head up	Ears forwards	Eyes open	Tail in motion
PASTURE	1	1	afternoon	2018_07_24	2	12:57:22:17	12:57:23:16	Standing		Head up	Ears forwards	Eyes open	Tail in motion
PASTURE	1	1	afternoon	2018_07_24	2	12:57:23:17	12:57:24:16	Standing		Head up	Ears forwards	Eyes open	Tail in motion
PASTURE	1	1	afternoon	2018_07_24	2	12:57:24:17	12:57:25:16	Standing		Head up	Ears forwards	Eyes open	Tail in motion
PASTURE	1	1	afternoon	2018_07_24	2	12:57:25:17	12:57:26:16	Standing		Head up	Ears forwards	Eyes open	Tail in motion
PASTURE	1	1	afternoon	2018_07_24	2	12:57:26:17	12:57:27:16	Standing		Head up	Ears forwards	Eyes open	Tail in motion
PASTURE	1	1	afternoon	2018_07_24	2	12:57:27:17	12:57:28:16	Standing		Head up	Ears forwards	Eyes open	Tail in motion
PASTURE	1	1	afternoon	2018_07_24	2	12:57:28:17	12:57:29:16	Standing		Head up	Ears forwards	Eyes open	Tail in motion
PASTURE	1	1	afternoon	2018_07_24	2	12:57:29:17	12:57:30:16	Standing		Head up	Ears forwards	Eyes open	Tail in motion
PASTURE	1	1	afternoon	2018_07_24	2	12:57:30:17	12:57:31:16	Standing		Head up	Ears forwards	Eyes open	Tail in motion
PASTURE	1	1	afternoon	2018_07_24	2	12:57:31:17	12:57:32:16	Standing		Head up	Ears forwards	Eyes open	Tail in motion
PASTURE	1	1	afternoon	2018_07_24	2	12:57:32:17	12:57:33:16	Standing		Head up	Ears forwards	Eyes open	Tail in motion
PASTURE	1	1	afternoon	2018_07_24	2	12:57:33:17	12:57:34:16	Standing		Head up	Ears forwards	Eyes open	Tail in motion
PASTURE	1	1	afternoon	2018_07_24	2	12:57:34:17	12:57:35:16	Standing		Head up	Ears forwards	Eyes open	Tail in motion
PASTURE	1	1	afternoon	2018_07_24	2	12:57:35:17	12:57:36:16	Standing		Head up	Ears forwards	Eyes open	Tail in motion
PASTURE	1	1	afternoon	2018_07_24	2	12:57:36:17	12:57:37:16	Standing		Head up	Ears forwards	Eyes open	Tail in motion
PASTURE	1	1	afternoon	2018_07_24	2	12:57:37:17	12:57:38:16	Standing		Head up	Ears forwards	Eyes open	Tail in motion
PASTURE	1	1	afternoon	2018_07_24	2	12:57:38:17	12:57:39:16	Standing		Head up	Ears forwards	Eyes open	Tail in motion
PASTURE	1	1	afternoon	2018_07_24	2	12:57:39:17	12:57:40:16	Standing		Head up	Ears forwards	Eyes open	Tail in motion
PASTURE	1	1	afternoon	2018_07_24	2	12:57:40:17	12:57:41:16	Standing		Head up	Ears forwards	Eyes open	Tail in motion
PASTURE	1	1	afternoon	2018_07_24	2	12:57:41:17	12:57:42:16	Standing		Head up	Ears forwards	Eyes open	Tail in motion
PASTURE	1	1	afternoon	2018_07_24	2	12:57:42:17	12:57:43:16	Standing		Head up	Ears forwards	Eyes open	Tail in motion
PASTURE	1	1	afternoon	2018_07_24	2	12:57:43:17	12:57:44:16	Standing		Head up	Ears forwards	Eyes open	Tail in motion
PASTURE	1	1	afternoon	2018_07_24	2	12:57:44:17	12:57:45:16	Standing		Head up	Ears forwards	Eyes open	Tail in motion
PASTURE	1	1	afternoon	2018_07_24	2	12:57:45:17	12:57:46:16	Standing		Head up	Ears forwards	Eyes open	Tail in motion
PASTURE	1	1	afternoon	2018_07_24	2	12:57:46:17	12:57:47:16	Standing		Head up	Ears forwards	Eyes open	Tail in motion
PASTURE	1	1	afternoon	2018_07_24	2	12:57:47:17	12:57:48:16	Standing		Head up	Ears forwards	Eyes open	Tail in motion
PASTURE	1	1	afternoon	2018_07_24	2	12:57:48:17	12:57:49:16	Standing		Head up	Ears forwards	Eyes open	Tail in motion
PASTURE	1	1	afternoon	2018_07_24	2	12:57:49:17	12:57:50:16	Standing		Head up	Ears forwards	Eyes open	Tail in motion
PASTURE	1	1	afternoon	2018_07_24	2	12:57:50:17	12:57:51:16	Standing		Head up	Ears forwards	Eyes open	Tail in motion
PASTURE	1	1	afternoon	2018_07_24	2	12:57:51:17	12:57:52:16	Standing		Head up	Ears forwards	Eyes open	Tail in motion
PASTURE	1	1	afternoon	2018_07_24	2	12:57:52:17	12:57:53:16	Standing		Head up	Ears forwards	Eyes open	Tail in motion
PASTURE	1	1	afternoon	2018_07_24	2	12:57:53:17	12:57:54:16	Standing		Head up	Ears forwards	Eyes open	Tail in motion
PASTURE	1	1	afternoon	2018_07_24	2	12:57:54:17	12:57:55:16	Standing		Head up	Ears forwards	Eyes open	Tail in motion
PASTURE	1	1	afternoon	2018_07_24	2	12:57:55:17	12:57:56:16	Standing		Head up	Ears forwards	Eyes open	Tail in motion
PASTURE	1	1	afternoon	2018_07_24	2	12:57:56:17	12:57:57:16	Standing		Head up	Ears forwards	Eyes open	Tail in motion
PASTURE	1	1	afternoon	2018_07_24	2	12:57:57:17	12:57:58:16	Standing		Head up	Ears forwards	Eyes open	Tail in motion
PASTURE	1	1	afternoon	2018_07_24	2	12:57:58:17	12:57:59:16	Standing		Head up	Ears forwards	Eyes open	Tail in motion
PASTURE	1	1	afternoon	2018_07_24	2	12:57:59:17	12:58:00:16	Standing		Head up	Ears forwards	Eyes open	Tail in motion
PASTURE	1	1	afternoon	2018_07_24	2	12:58:00:17	12:58:01:16	Standing		Head up	Ears forwards	Eyes open	Tail in motion
PASTURE	1	1	afternoon	2018_07_24	2	12:58:01:17	12:58:02:16	Standing		Head up	Ears forwards	Eyes open	Tail in motion
PASTURE	1	1	afternoon	2018_07_24	2	12:58:02:17	12:58:03:16	Standing		Head up	Ears forwards	Eyes open	Tail in motion
PASTURE	1	1	afternoon	2018_07_24	2	12:58:03:17	12:58:04:16	Standing		Head up	Ears forwards	Eyes open	Tail in motion
PASTURE	1	1	afternoon	2018_07_24	2	12:58:04:17	12:58:05:16	Standing		Head up	Ears forwards	Eyes open	Tail in motion
PASTURE	1	1	afternoon	2018_07_24	2	12:58:05:17	12:58:06:16	Standing		Head up	Ears forwards	Eyes open	Tail in motion
PASTURE	1	1	afternoon	2018_07_24	2	12:58:06:17	12:58:07:16	Standing		Head up	Ears forwards	Eyes open	Tail in motion
PASTURE	1	1	afternoon	2018_07_24	2	12:58:07:17	12:58:08:16	Standing		Head up	Ears forwards	Eyes open	Tail in motion
PASTURE	1	1	afternoon	2018_07_24	2	12:58:08:17	12:58:09:16	Standing		Head up	Ears forwards	Eyes open	Tail in motion
PASTURE	1	1	afternoon	2018_07_24	2	12:58:09:17	12:58:10:16	Standing		Head up	Ears forwards	Eyes open	Tail in motion
PASTURE	1	1	afternoon	2018_07_24	2	12:58:10:17	12:58:11:16	Standing		Head up	Ears forwards	Eyes open	Tail in motion
PASTURE	1	1	afternoon	2018_07_24	2	12:58:11:17	12:58:12:16	Standing		Head up	Ears forwards	Eyes open	Tail in motion
PASTURE	1	1	afternoon	2018_07_24	2	12:58:12:17	12:58:13:16	Standing		Head up	Ears forwards	Eyes open	Tail in motion
PASTURE	1	1	afternoon	2018_07_24	2	12:58:13:17	12:58:14:16	Standing		Head up	Ears forwards	Eyes open	Tail in motion
PASTURE	1	1	afternoon	2018_07_24	2	12:58:14:17	12:58:15:16	Standing		Head up	Ears forwards	Eyes open	Tail in motion
PASTURE	1	1	afternoon	2018_07_24	2	12:58:15:17	12:58:16:16	Standing		Head up	Ears forwards	Eyes open	Tail in motion
PASTURE	1	1	afternoon	2018_07_24	2	12:58:16:17	12:58:17:16	Standing		Head up	Ears forwards	Eyes open	Tail in motion
PASTURE	1	1	afternoon	2018_07_24	2	12:58:17:17	12:58:18:16	Standing		Head up	Ears forwards	Eyes open	Tail in motion
PASTURE	1	1	afternoon	2018_07_24	2	12:58:18:17	12:58:19:16	Standing		Head up	Ears forwards	Eyes open	Tail in motion
PASTURE	1	1	afternoon	2018_07_24	2	12:58:19:17	12:58:20:16	Standing		Head up	Ears forwards	Eyes open	Tail in motion
PASTURE	1	1	afternoon	2018_07_24	2	12:58:20:17	12:58:21:16	Standing		Head up	Ears forwards	Eyes open	Tail in motion
PASTURE	1	1	afternoon	2018_07_24	2	12:58:21:17	12:58:22:16	Standing		Head up	Ears forwards	Eyes open	Tail in motion
PASTURE	1	1	afternoon	2018_07_24	2	12:58:22:17	12:58:23:16	Standing		Head up	Ears forwards	Eyes open	Tail in motion
PASTURE	1	1	afternoon	2018_07_24	2	12:58:23:17	12:58:24:16	Standing		Head up	Ears forwards	Eyes open	Tail in motion
PASTURE	1	1	afternoon	2018_07_24	2	12:58:24:17	12:58:25:16	Standing		Head up	Ears forwards	Eyes open	Tail in motion
PASTURE	1	1	afternoon	2018_07_24	2	12:58:25:17	12:58:26:16	Standing		Head up	Ears forwards	Eyes open	Tail in motion
PASTURE	1	1	afternoon	2018_07_24	2	12:58:26:17	12:58:27:16	Standing		Head up	Ears forwards	Eyes open	Tail in motion
PASTURE	1	1	afternoon	2018_07_24	2	12:58:27:17	12:58:28:16	Standing		Head up	Ears forwards	Eyes open	Tail in motion
PASTURE	1	1	afternoon	2018_07_24	2	12:58:28:17	12:58:29:16	Standing		Head up	Ears forwards	Eyes open	Tail in motion
PASTURE	1	1	afternoon	2018_07_24	2	12:58:29:17	12:58:30:16	Standing		Head up	Ears forwards	Eyes open	Tail in motion
PASTURE	1	1	afternoon	2018_07_24	2	12:58:30:17	12:58:31:16	Standing		Head up	Ears forwards	Eyes open	Tail in motion
PASTURE	1	1	afternoon	2018_07_24	2	12:58:31:17	12:58:32:16	Standing		Head up	Ears forwards	Eyes open	Tail in motion
PASTURE	1	1	afternoon	2018_07_24	2	12:58:32:17	12:58:33:16	Standing		Head up	Ears forwards	Eyes open	Tail in motion
PASTURE	1	1	afternoon	2018_07_24	2	12:58:33:17	12:58:34:16	Standing		Head up	Ears forwards	Eyes open	Tail in motion
PASTURE	1	1	afternoon	2018_07_24	2	12:58:34:17	12:58:35:16	Standing		Head up	Ears forwards	Eyes open	Tail in motion
PASTURE	1	1	afternoon	2018_07_24	2	12:58:35:17	12:58:36:16	Standing		Head up	Ears forwards	Eyes open	Tail in motion
PASTURE	1	1	afternoon	2018_07_24	2	12:58:36:17	12:58:37:16	Standing		Head up	Ears forwards	Eyes open	Tail in motion
PASTURE	1	1	afternoon	2018_07_24	2	12:58:37:17	12:58:38:16	Standing		Head up	Ears forwards	Eyes open	Tail in motion
PASTURE	1	1	afternoon	2018_07_24	2	12:58:38:17	12:58:39:16	Standing		Head up	Ears forwards	Eyes open	Tail in motion
PASTURE	1	1	afternoon	2018_07_24	2	12:58:39:17	12:58:40:16	Standing		Head up	Ears forwards	Eyes open	Tail in motion
PASTURE	1	1	afternoon	2018_07_24	2	12:58:40:17	12:58:41:16	Standing		Head up	Ears forwards	Eyes open	Tail in motion
PASTURE	1	1	afternoon	2018_07_24	2	12:58:41:17	12:58:42:16	Standing		Head up	Ears forwards	Eyes open	Tail in motion
PASTURE	1	1	afternoon	2018_07_24	2	12:58:42:17	12:58:43:16	Standing		Head up	Ears forwards	Eyes open	Tail in motion
PASTURE	1	1	afternoon	2018_07_24	2	12:58:43:17	12:58:44:16	Standing		Head up	Ears forwards	Eyes open	Tail in motion
PASTURE	1	1	afternoon	2018_07_24	2	12:58:44:17	12:58:45:16	Standing		Head up	Ears forwards	Eyes open	Tail in motion
PASTURE	1	1	afternoon	2018_07_24	2	12:58:45:17	12:58:46:16	Standing		Head up	Ears forwards	Eyes open	Tail in motion
PASTURE	1	1	afternoon	2018_07_24	2	12:58:46:17	12:58:47:16	Standing		Head up	Ears forwards	Eyes open	Tail in motion
PASTURE	1	1	afternoon	2018_07_24	2	12:58:47:17	12:58:48:16	Standing		Head up	Ears forwards	Eyes open	Tail in motion
PASTURE	1	1	afternoon	2018_07_24	2	12:58:48:17	12:58:49:16	Standing		Head up	Ears forwards	Eyes open	Tail in motion
PASTURE	1	1	afternoon	2018_07_24	2	12:58:49:17	12:58:50:16	Standing		Head up	Ears forwards	Eyes open	Tail in motion
PASTURE	1	1	afternoon	2018_07_24	2	12:58:50:17	12:58:51:16	Standing		Head up	Ears forwards	Eyes open	Tail in motion
PASTURE	1	1	afternoon	2018_07_24	2	12:58:51:17	12:58:52:16	Standing		Head up	Ears forwards	Eyes open	Tail in motion
PASTURE	1	1	afternoon	2018_07_24	2	12:58:52:17	12:58:53:16	Standing		Head up	Ears forwards	Eyes open	Tail in motion
PASTURE	1	1	afternoon	2018_07_24	2	12:58:53:17	12:58:54:16	Standing		Head up	Ears forwards	Eyes open	Tail in motion
PASTURE	1	1	afternoon	2018_07_24	2	12:58:54:17	12:58:55:16	Standing		Head up	Ears forwards	Eyes open	Tail in motion
PASTURE	1	1	afternoon	2018_07_24	2	12:58:55:17	12:58:56:16	Standing		Head up	Ears forwards	Eyes open	Tail in motion
PASTURE	1	1	afternoon	2018_07_24	2	12:58:56:17	12:58:57:16	Standing		Head up	Ears forwards	Eyes open	Tail in motion
PASTURE	1	1	afternoon	2018_07_24	2	12:58:57:17	12:58:58:16	Standing		Head up	Ears forwards	Eyes open	Tail in motion
PASTURE	1	1	afternoon	2018_07_24	2	12:58:58:17	12:58:59:16	Standing		Head up	Ears forwards	Eyes open	Tail in motion
PASTURE	1	1	afternoon	2018_07_24	2	12:58:59:17	12:59:00:16	Standing		Head up	Ears forwards	Eyes open	Tail in motion
PASTURE	1	1	afternoon	2018_07_24	2	12:59:00:17	12:59:01:16	Standing		Head up	Ears forwards	Eyes open	Tail in motion
PASTURE	1	1	afternoon	2018_07_24	2	12:59:01:17	12:59:02:16	Standing		Head up	Ears forwards	Eyes open	Tail in motion
PASTURE	1	1	afternoon	2018_07_24	2	12:59:02:17	12:59:03:16	Standing		Head up	Ears forwards	Eyes open	Tail in motion
PASTURE	1	1	afternoon	2018_07_24	2	12:59:03:17	12:59:04:16	Standing		Head up	Ears forwards	Eyes open	Tail in motion
PASTURE	1	1	afternoon	2018_07_24	2	12:59:04:17	12:59:05:16	Standing		Head up	Ears forwards	Eyes open	Tail in motion
PASTURE	1	1	afternoon	2018_07_24	2	12:59:05:17	12:59:06:16	Standing		Head up	Ears forwards	Eyes open	Tail in motion
PASTURE	1	1	afternoon	2018_07_24	2	12:59:06:17	12:59:07:16	Standing		Head up	Ears forwards	Eyes open	Tail in motion
PASTURE	1	1	afternoon	2018_07_24	2	12:59:07:17	12:59:08:16	Standing		Head up	Ears forwards	Eyes open	Tail in motion
PASTURE	1	1	afternoon	2018_07_24	2	12:59:08:17	12:59:09:16	Standing		Head up	Ears forwards	Eyes open	Tail hanging
PASTURE	1	1	afternoon	2018_07_24	2	12:59:09:17	12:59:10:16	Standing		Head up	Ears forwards	Eyes open	Tail hanging
PASTURE	1	1	afternoon	2018_07_24	2	12:59:10:17	12:59:11:16	Standing		Head up	Ears forwards	Eyes open	Tail hanging
PASTURE	1	1	afternoon	2018_07_24	2	12:59:11:17	12:59:12:16	Standing		Head up	Ears forwards	Eyes open	Tail hanging
PASTURE	1	1	afternoon	2018_07_24	2	12:59:12:17	12:59:13:16	Standing		Head up	Ears forwards	Eyes open	Tail hanging
PASTURE	1	1	afternoon	2018_07_24	2	12:59:13:17	12:59:14:16	Standing		Head up	Ears forwards	Eyes open	Tail in motion
PASTURE	1	1	afternoon	2018_07_24	2	12:59:14:17	12:59:15:16	Standing		Head up	Ears forwards	Eyes open	Tail in motion
PASTURE	1	1	afternoon	2018_07_24	2	12:59:15:17	12:59:16:16	Standing		Head up	Ears forwards	Eyes open	Tail in motion
PASTURE	1	1	afternoon	2018_07_24	2	12:59:16:17	12:59:17:16	Standing		Head up	Ears forwards	Eyes open	Tail in motion
PASTURE	1	1	afternoon	2018_07_24	2	12:59:17:17	12:59:18:16	Standing		Head up	Ears forwards	Eyes open	Tail in motion
PASTURE	1	1	afternoon	2018_07_24	2	12:59:18:17	12:59:19:16	Standing		Head up	Ears forwards	Eyes open	Tail in motion
PASTURE	1	1	afternoon	2018_07_24	2	12:59:19:17	12:59:20:16	Standing		Head up	Ears forwards	Eyes open	Tail in motion
PASTURE	1	1	afternoon	2018_07_24	2	12:59:20:17	12:59:21:16	Standing		Head up	Ears forwards	Eyes open	Tail in motion
PASTURE	1	1	afternoon	2018_07_24	2	12:59:21:17	12:59:22:16	Standing		Head up	Ears forwards	Eyes open	Tail in motion
PASTURE	1	1	afternoon	2018_07_24	2	12:59:22:17	12:59:23:16	Standing		Head up	Ears forwards	Eyes open	Tail in motion
PASTURE	1	1	afternoon	2018_07_24	2	12:59:23:17	12:59:24:16	Standing		Head up	Ears forwards	Eyes open	Tail in motion
PASTURE	1	1	afternoon	2018_07_24	2	12:59:24:17	12:59:25:16	Standing		Head up	Ears forwards	Eyes open	Tail in motion
PASTURE	1	1	afternoon	2018_07_24	2	12:59:25:17	12:59:26:16	Standing		Head up	Ears forwards	Eyes open	Tail in motion
PASTURE	1	1	afternoon	2018_07_24	2	12:59:26:17	12:59:27:16	Standing		Head up	Ears forwards	Eyes open	Tail in motion
PASTURE	1	1	afternoon	2018_07_24	2	12:59:27:17	12:59:28:16	Standing		Head up	Ears forwards	Eyes open	Tail in motion
PASTURE	1	1	afternoon	2018_07_24	2	12:59:28:17	12:59:29:16	Standing		Head up	Ears forwards	Eyes open	Tail in motion
PASTURE	1	1	afternoon	2018_07_24	2	12:59:29:17	12:59:30:16	Standing		Head up	Ears forwards	Eyes open	Tail in motion
PASTURE	1	1	afternoon	2018_07_24	2	12:59:30:17	12:59:31:16	Standing		Head up	Ears forwards	Eyes open	Tail in motion
PASTURE	1	1	afternoon	2018_07_24	2	12:59:31:17	12:59:32:16	Standing		Head up	Ears forwards	Eyes open	Tail in motion
PASTURE	1	1	afternoon	2018_07_24	2	12:59:32:17	12:59:33:16	Standing		Head up	Ears forwards	Eyes open	Tail in motion
PASTURE	1	1	afternoon	2018_07_24	2	12:59:33:17	12:59:34:16	Standing		Head up	Ears forwards	Eyes open	Tail in motion
PASTURE	1	1	afternoon	2018_07_24	2	12:59:34:17	12:59:35:16	Standing		Head up	Ears forwards	Eyes open	Tail in motion
PASTURE	1	1	afternoon	2018_07_24	2	12:59:35:17	12:59:36:16	Standing		Head up	Ears forwards	Eyes open	Tail in motion
PASTURE	1	1	afternoon	2018_07_24	2	12:59:36:17	12:59:37:16	Standing		Head up	Ears forwards	Eyes open	Tail in motion
PASTURE	1	1	afternoon	2018_07_24	2	12:59:37:17	12:59:38:16	Standing		Head up	Ears forwards	Eyes open	Tail in motion
PASTURE	1	1	afternoon	2018_07_24	2	12:59:38:17	12:59:39:16	Standing		Head up	Ears backwards	Eyes open	Tail in motion
PASTURE	1	1	afternoon	2018_07_24	2	12:59:39:17	12:59:40:16	Standing		Head up	Ears backwards	Eyes open	Tail in motion
PASTURE	1	1	afternoon	2018_07_24	2	12:59:40:17	12:59:41:16	Standing		Head up	Ears backwards	Eyes open	Tail in motion
PASTURE	1	1	afternoon	2018_07_24	2	12:59:41:17	12:59:42:16	Standing		Head up	Ears backwards	Eyes open	Tail in motion
PASTURE	1	1	afternoon	2018_07_24	2	12:59:42:17	12:59:43:16	Standing		Head up	Ears backwards	Eyes open	Tail in motion
PASTURE	1	1	afternoon	2018_07_24	2	12:59:43:17	12:59:44:16	Standing		Head up	Ears backwards	Eyes open	Tail in motion
PASTURE	1	1	afternoon	2018_07_24	2	12:59:44:17	12:59:45:16	Standing		Head up	Ears backwards	Eyes open	Tail in motion
PASTURE	1	1	afternoon	2018_07_24	2	12:59:45:17	12:59:46:16	Standing		Head up	Ears backwards	Eyes open	Tail in motion
PASTURE	1	1	afternoon	2018_07_24	2	12:59:46:17	12:59:47:16	Standing		Head up	Ears backwards	Eyes open	Tail in motion
PASTURE	1	1	afternoon	2018_07_24	2	12:59:47:17	12:59:48:16	Standing		Head up	Ears backwards	Eyes open	Tail in motion
PASTURE	1	1	afternoon	2018_07_24	2	12:59:48:17	12:59:49:16	Standing		Head up	Ears backwards	Eyes open	Tail in motion
PASTURE	1	1	afternoon	2018_07_24	2	12:59:49:17	12:59:50:16	Standing		Head up	Ears backwards	Eyes open	Tail in motion
PASTURE	1	1	afternoon	2018_07_24	2	12:59:50:17	12:59:51:16	Standing		Head up	Ears backwards	Eyes open	Tail in motion
PASTURE	1	1	afternoon	2018_07_24	2	12:59:51:17	12:59:52:16	Standing		Head up	Ears backwards	Eyes open	Tail in motion
PASTURE	1	1	afternoon	2018_07_24	2	12:59:52:17	12:59:53:16	Standing		Head up	Ears backwards	Eyes open	Tail in motion
PASTURE	1	1	afternoon	2018_07_24	2	12:59:53:17	12:59:54:16	Standing		Head up	Ears backwards	Eyes open	Tail in motion
PASTURE	1	1	afternoon	2018_07_24	2	12:59:54:17	12:59:55:16	Standing		Head up	Ears backwards	Eyes open	Tail in motion
PASTURE	1	1	afternoon	2018_07_24	2	12:59:55:17	12:59:56:16	Standing		Head up	Ears backwards	Eyes open	Tail in motion
PASTURE	1	1	afternoon	2018_07_24	2	12:59:56:17	12:59:57:16	Standing		Head up	Ears backwards	Eyes open	Tail in motion
PASTURE	1	1	afternoon	2018_07_24	2	12:59:57:17	12:59:58:16	Standing		Head up	Ears backwards	Eyes open	Tail in motion
PASTURE	1	1	afternoon	2018_07_24	2	12:59:58:17	12:59:59:16	Standing		Head up	Ears backwards	Eyes open	Tail in motion
PASTURE	1	1	afternoon	2018_07_24	2	12:59:59:17	13:00:00:16	Standing		Head up	Ears backwards	Eyes open	Tail in motion
PASTURE	1	1	afternoon	2018_07_24	2	13:00:00:17	13:00:01:16	Standing		Head up	Ears backwards	Eyes open	Tail in motion
PASTURE	1	1	afternoon	2018_07_24	2	13:00:01:17	13:00:02:16	Standing		Head up	Ears backwards	Eyes open	Tail in motion
PASTURE	1	1	afternoon	2018_07_24	2	13:00:02:17	13:00:03:16	Standing		Head up	Ears backwards	Eyes open	Tail in motion
PASTURE	1	1	afternoon	2018_07_24	2	13:00:03:17	13:00:04:16	Standing		Head up	Ears backwards	Eyes open	Tail in motion
PASTURE	1	1	afternoon	2018_07_24	2	13:00:04:17	13:00:05:16	Standing		Head up	Ears backwards	Eyes open	Tail in motion
PASTURE	1	1	afternoon	2018_07_24	2	13:00:05:17	13:00:06:16	Standing		Head up	Ears backwards	Eyes open	Tail in motion
PASTURE	1	1	afternoon	2018_07_24	2	13:00:06:17	13:00:07:16	Standing		Head up	Ears backwards	Eyes open	Tail in motion
PASTURE	1	1	afternoon	2018_07_24	2	13:00:07:17	13:00:08:16	Standing		Head up	Ears backwards	Eyes open	Tail in motion
PASTURE	1	1	afternoon	2018_07_24	2	13:00:08:17	13:00:09:16	Standing		Head up	Ears backwards	Eyes open	Tail in motion
PASTURE	1	1	afternoon	2018_07_24	2	13:00:09:17	13:00:10:16	Standing		Head up	Ears backwards	Eyes open	Tail in motion
PASTURE	1	1	afternoon	2018_07_24	2	13:00:10:17	13:00:11:16	Standing		Head up	Ears backwards	Eyes open	Tail in motion
PASTURE	1	1	afternoon	2018_07_24	2	13:00:11:17	13:00:12:16	Standing		Head up	Ears backwards	Eyes open	Tail in motion
PASTURE	1	1	afternoon	2018_07_24	2	13:00:12:17	13:00:13:16	Standing		Head up	Ears backwards	Eyes open	Tail in motion
PASTURE	1	1	afternoon	2018_07_24	2	13:00:13:17	13:00:14:16	Standing		Head up	Ears backwards	Eyes open	Tail in motion
PASTURE	1	1	afternoon	2018_07_24	2	13:00:14:17	13:00:15:16	Standing		Head up	Ears backwards	Eyes open	Tail in motion
PASTURE	1	1	afternoon	2018_07_24	2	13:00:15:17	13:00:16:16	Standing		Head up	Ears backwards	Eyes open	Tail in motion
PASTURE	1	1	afternoon	2018_07_24	2	13:00:16:17	13:00:17:16	Standing		Head up	Ears backwards	Eyes open	Tail in motion
PASTURE	1	1	afternoon	2018_07_24	2	13:00:17:17	13:00:18:16	Standing		Head up	Ears backwards	Eyes open	Tail in motion
PASTURE	1	1	afternoon	2018_07_24	2	13:00:18:17	13:00:19:16	Standing		Head up	Ears backwards	Eyes open	Tail in motion
PASTURE	1	1	afternoon	2018_07_24	2	13:00:19:17	13:00:20:16	Standing		Head up	Ears backwards	Eyes open	Tail in motion
PASTURE	1	1	afternoon	2018_07_24	2	13:00:20:17	13:00:21:16	Standing		Head up	Ears forwards	Eyes open	Tail in motion
PASTURE	1	1	afternoon	2018_07_24	2	13:00:21:17	13:00:22:16	Standing		Head up	Ears forwards	Eyes open	Tail in motion
PASTURE	1	1	afternoon	2018_07_24	2	13:00:22:17	13:00:23:16	Standing		Head up	Ears forwards	Eyes open	Tail in motion
PASTURE	1	1	afternoon	2018_07_24	2	13:00:23:17	13:00:24:16	Standing		Head up	Ears forwards	Eyes open	Tail in motion
PASTURE	1	1	afternoon	2018_07_24	2	13:00:24:17	13:00:25:16	Standing		Head up	Ears forwards	Eyes open	Tail in motion
PASTURE	1	1	afternoon	2018_07_24	2	13:00:25:17	13:00:26:16	Standing		Head up	Ears forwards	Eyes open	Tail in motion
PASTURE	1	1	afternoon	2018_07_24	2	13:00:26:17	13:00:27:16	Standing		Head up	Ears forwards	Eyes open	Tail in motion
PASTURE	1	1	afternoon	2018_07_24	2	13:00:27:17	13:00:28:16	Standing		Head up	Ears forwards	Eyes open	Tail in motion
PASTURE	1	1	afternoon	2018_07_24	2	13:00:28:17	13:00:29:16	Standing		Head up	Ears forwards	Eyes open	Tail in motion
PASTURE	1	1	afternoon	2018_07_24	2	13:00:29:17	13:00:30:16	Standing		Head up	Ears forwards	Eyes open	Tail in motion
PASTURE	1	1	afternoon	2018_07_24	2	13:00:30:17	13:00:31:16	Standing		Head up	Ears forwards	Eyes open	Tail in motion
PASTURE	1	1	afternoon	2018_07_24	2	13:00:31:17	13:00:32:16	Standing		Head up	Ears forwards	Eyes open	Tail in motion
PASTURE	1	1	afternoon	2018_07_24	2	13:00:32:17	13:00:33:16	Standing		Head up	Ears forwards	Eyes open	Tail in motion
PASTURE	1	1	afternoon	2018_07_24	2	13:00:33:17	13:00:34:16	Standing		Head up	Ears forwards	Eyes open	Tail in motion
PASTURE	1	1	afternoon	2018_07_24	2	13:00:34:17	13:00:35:16	Standing		Head up	Ears forwards	Eyes open	Tail in motion
PASTURE	1	1	afternoon	2018_07_24	2	13:01:06:17	13:01:07:16	Standing		Head up	Ears backwards	Eyes open	Tail hanging
PASTURE	1	1	afternoon	2018_07_24	2	13:01:07:17	13:01:08:16	Standing		Head up	Ears backwards	Eyes open	Tail hanging
PASTURE	1	1	afternoon	2018_07_24	2	13:01:08:17	13:01:09:16	Standing		Head up	Ears backwards	Eyes open	Tail hanging
PASTURE	1	1	afternoon	2018_07_24	2	13:01:09:17	13:01:10:16	Standing		Head up	Ears backwards	Eyes open	Tail hanging
PASTURE	1	1	afternoon	2018_07_24	2	13:01:10:17	13:01:11:16	Standing		Head up	Ears backwards	Eyes open	Tail hanging
PASTURE	1	1	afternoon	2018_07_24	2	13:01:11:17	13:01:12:16	Standing		Head up	Ears backwards	Eyes open	Tail hanging
PASTURE	1	1	afternoon	2018_07_24	2	13:01:12:17	13:01:13:16	Standing		Head up	Ears backwards	Eyes open	Tail hanging
PASTURE	1	1	afternoon	2018_07_24	2	13:01:13:17	13:01:14:16	Standing		Head up	Ears backwards	Eyes open	Tail hanging
PASTURE	1	1	afternoon	2018_07_24	2	13:01:14:17	13:01:15:16	Standing		Head up	Ears backwards	Eyes open	Tail hanging
PASTURE	1	1	afternoon	2018_07_24	2	13:01:15:17	13:01:16:16	Standing		Head up	Ears backwards	Eyes open	Tail hanging
PASTURE	1	1	afternoon	2018_07_24	2	13:01:16:17	13:01:17:16	Standing		Head up	Ears backwards	Eyes open	Tail hanging
PASTURE	1	1	afternoon	2018_07_24	2	13:01:17:17	13:01:18:16	Standing		Head up	Ears backwards	Eyes open	Tail hanging
PASTURE	1	1	afternoon	2018_07_24	2	13:01:18:17	13:01:19:16	Standing		Head up	Ears backwards	Eyes open	Tail hanging
PASTURE	1	1	afternoon	2018_07_24	2	13:01:19:17	13:01:20:16	Standing		Head up	Ears backwards	Eyes open	Tail hanging
PASTURE	1	1	afternoon	2018_07_24	2	13:01:20:17	13:01:21:16	Standing		Head up	Ears backwards	Eyes open	Tail hanging
PASTURE	1	1	afternoon	2018_07_24	2	13:01:21:17	13:01:22:16	Standing		Head up	Ears backwards	Eyes open	Tail hanging
PASTURE	1	1	afternoon	2018_07_24	2	13:01:22:17	13:01:23:16	Standing		Head up	Ears backwards	Eyes open	Tail hanging
PASTURE	1	1	afternoon	2018_07_24	2	13:01:23:17	13:01:24:16	Standing		Head up	Ears backwards	Eyes open	Tail hanging
PASTURE	1	1	afternoon	2018_07_24	2	13:01:24:17	13:01:25:16	Standing		Head up	Ears backwards	Eyes open	Tail hanging
PASTURE	1	1	afternoon	2018_07_24	2	13:01:25:17	13:01:26:16	Standing		Head up	Ears backwards	Eyes open	Tail hanging
PASTURE	1	1	afternoon	2018_07_24	2	13:01:26:17	13:01:27:16	Standing		Head up	Ears asymmetrical	Eyes open	Tail hanging
PASTURE	1	1	afternoon	2018_07_24	2	13:01:27:17	13:01:28:16	Standing		Head up	Ears asymmetrical	Eyes open	Tail hanging
PASTURE	1	1	afternoon	2018_07_24	2	13:01:28:17	13:01:29:16	Standing		Head up	Ears asymmetrical	Eyes open	Tail hanging
PASTURE	1	1	afternoon	2018_07_24	2	13:01:29:17	13:01:30:16	Standing		Head up	Ears asymmetrical	Eyes open	Tail hanging
PASTURE	1	1	afternoon	2018_07_24	2	13:01:30:17	13:01:31:16	Standing		Head up	Ears asymmetrical	Eyes open	Tail hanging
PASTURE	1	1	afternoon	2018_07_24	2	13:01:31:17	13:01:32:16	Standing		Head up	Ears asymmetrical	Eyes open	Tail in motion
PASTURE	1	1	afternoon	2018_07_24	2	13:01:32:17	13:01:33:16	Standing		Head up	Ears asymmetrical	Eyes open	Tail in motion
PASTURE	1	1	afternoon	2018_07_24	2	13:01:33:17	13:01:34:16	Standing		Head up	Ears asymmetrical	Eyes open	Tail in motion
PASTURE	1	1	afternoon	2018_07_24	2	13:01:34:17	13:01:35:16	Standing		Head up	Ears asymmetrical	Eyes open	Tail in motion
PASTURE	1	1	afternoon	2018_07_24	2	13:01:35:17	13:01:36:16	Standing		Head up	Ears asymmetrical	Eyes open	Tail in motion
PASTURE	1	1	afternoon	2018_07_24	2	13:01:36:17	13:01:37:16	Standing		Head up	Ears asymmetrical	Eyes open	Tail in motion
PASTURE	1	1	afternoon	2018_07_24	2	13:01:37:17	13:01:38:16	Standing		Head up	Ears asymmetrical	Eyes open	Tail in motion
PASTURE	1	1	afternoon	2018_07_24	2	13:01:38:17	13:01:39:16	Standing		Head up	Ears asymmetrical	Eyes open	Tail in motion
PASTURE	1	1	afternoon	2018_07_24	2	13:01:39:17	13:01:40:16	Standing		Head up	Ears asymmetrical	Eyes open	Tail in motion
PASTURE	1	1	afternoon	2018_07_24	2	13:01:40:17	13:01:41:16	Standing		Head up	Ears asymmetrical	Eyes open	Tail in motion
PASTURE	1	1	afternoon	2018_07_24	2	13:01:41:17	13:01:42:16	Standing		Head up	Ears asymmetrical	Eyes open	Tail in motion
PASTURE	1	1	afternoon	2018_07_24	2	13:01:42:17	13:01:43:16	Standing		Head up	Ears asymmetrical	Eyes open	Tail in motion
PASTURE	1	1	afternoon	2018_07_24	2	13:01:43:17	13:01:44:16	Standing		Head up	Ears asymmetrical	Eyes open	Tail in motion
PASTURE	1	1	afternoon	2018_07_24	2	13:01:44:17	13:01:45:16	Standing		Head up	Ears asymmetrical	Eyes open	Tail in motion
PASTURE	1	1	afternoon	2018_07_24	2	13:01:45:17	13:01:46:16	Standing		Head up	Ears asymmetrical	Eyes open	Tail in motion
PASTURE	1	1	afternoon	2018_07_24	2	13:01:46:17	13:01:47:16	Standing		Head up	Ears asymmetrical	Eyes open	Tail in motion
PASTURE	1	1	afternoon	2018_07_24	2	13:01:47:17	13:01:48:16	Standing		Head up	Ears asymmetrical	Eyes open	Tail in motion
PASTURE	1	1	afternoon	2018_07_24	2	13:01:48:17	13:01:49:16	Standing		Head up	Ears asymmetrical	Eyes open	Tail in motion
PASTURE	1	1	afternoon	2018_07_24	2	13:01:49:17	13:01:50:16	Standing		Head up	Ears forwards	Eyes open	Tail in motion
PASTURE	1	1	afternoon	2018_07_24	2	13:01:50:17	13:01:51:16	Standing		Head up	Ears forwards	Eyes open	Tail in motion
PASTURE	1	1	afternoon	2018_07_24	2	13:01:51:17	13:01:52:16	Standing		Head up	Ears forwards	Eyes open	Tail in motion
PASTURE	1	1	afternoon	2018_07_24	2	13:01:52:17	13:01:53:16	Standing		Head up	Ears forwards	Eyes open	Tail in motion
PASTURE	1	1	afternoon	2018_07_24	2	13:01:53:17	13:01:54:16	Standing		Head up	Ears forwards	Eyes open	Tail in motion
PASTURE	1	1	afternoon	2018_07_24	2	13:01:54:17	13:01:55:16	Standing		Head up	Ears forwards	Eyes open	Tail in motion
PASTURE	1	1	afternoon	2018_07_24	2	13:01:55:17	13:01:56:16	Standing		Head up	Ears forwards	Eyes open	Tail in motion
PASTURE	1	1	afternoon	2018_07_24	2	13:01:56:17	13:01:57:16	Standing		Head up	Ears forwards	Eyes open	Tail in motion
PASTURE	1	1	afternoon	2018_07_24	2	13:01:57:17	13:01:58:16	Standing		Head up	Ears forwards	Eyes open	Tail in motion
PASTURE	1	1	afternoon	2018_07_24	2	13:01:58:17	13:01:59:16	Standing		Head up	Ears forwards	Eyes open	Tail in motion
PASTURE	1	1	afternoon	2018_07_24	2	13:01:59:17	13:02:00:16	Standing		Head up	Ears forwards	Eyes open	Tail in motion
PASTURE	1	1	afternoon	2018_07_24	2	13:02:00:17	13:02:01:16	Standing		Head up	Ears forwards	Eyes open	Tail in motion
PASTURE	1	1	afternoon	2018_07_24	2	13:02:01:17	13:02:02:16	Standing		Head up	Ears forwards	Eyes open	Tail in motion
PASTURE	1	1	afternoon	2018_07_24	2	13:02:02:17	13:02:03:16	Standing		Head up	Ears forwards	Eyes open	Tail in motion
PASTURE	1	1	afternoon	2018_07_24	2	13:02:03:17	13:02:04:16	Standing		Head up	Ears forwards	Eyes open	Tail in motion
PASTURE	1	1	afternoon	2018_07_24	2	13:02:04:17	13:02:05:16	Standing		Head up	Ears forwards	Eyes open	Tail in motion
PASTURE	1	1	afternoon	2018_07_24	2	13:02:05:17	13:02:06:16	Standing		Head up	Ears forwards	Eyes open	Tail in motion
PASTURE	1	1	afternoon	2018_07_24	2	13:02:06:17	13:02:07:16	Standing		Head up	Ears forwards	Eyes open	Tail in motion
PASTURE	1	1	afternoon	2018_07_24	2	13:02:07:17	13:02:08:16	Standing		Head up	Ears forwards	Eyes open	Tail in motion
PASTURE	1	1	afternoon	2018_07_24	2	13:02:08:17	13:02:09:16	Standing		Head up	Ears forwards	Eyes open	Tail in motion
PASTURE	1	1	afternoon	2018_07_24	2	13:02:09:17	13:02:10:16	Standing		Head up	Ears forwards	Eyes open	Tail in motion
PASTURE	1	1	afternoon	2018_07_24	2	13:02:10:17	13:02:11:16	Standing		Head up	Ears forwards	Eyes open	Tail in motion
PASTURE	1	1	afternoon	2018_07_24	2	13:02:11:17	13:02:12:16	Standing		Head up	Ears forwards	Eyes closed	Tail in motion
PASTURE	1	1	afternoon	2018_07_24	2	13:02:12:17	13:02:13:16	Standing		Head up	Ears forwards	Eyes closed	Tail in motion
PASTURE	1	1	afternoon	2018_07_24	2	13:02:13:17	13:02:14:16	Standing		Head up	Ears forwards	Eyes closed	Tail in motion
PASTURE	1	1	afternoon	2018_07_24	2	13:02:14:17	13:02:15:16	Standing		Head up	Ears forwards	Eyes closed	Tail in motion
PASTURE	1	1	afternoon	2018_07_24	2	13:02:15:17	13:02:16:16	Standing		Head up	Ears forwards	Eyes closed	Tail in motion
PASTURE	1	1	afternoon	2018_07_24	2	13:02:16:17	13:02:17:16	Standing		Head up	Ears forwards	Eyes closed	Tail in motion
PASTURE	1	1	afternoon	2018_07_24	2	13:02:17:17	13:02:18:16	Standing		Head up	Ears forwards	Eyes closed	Tail in motion
PASTURE	1	1	afternoon	2018_07_24	2	13:02:18:17	13:02:19:16	Standing		Head up	Ears forwards	Eyes closed	Tail in motion
PASTURE	1	1	afternoon	2018_07_24	2	13:02:19:17	13:02:20:16	Standing		Head up	Ears forwards	Eyes closed	Tail in motion
PASTURE	1	1	afternoon	2018_07_24	2	13:02:20:17	13:02:21:16	Standing		Head up	Ears forwards	Eyes closed	Tail in motion
PASTURE	1	1	afternoon	2018_07_24	2	13:02:21:17	13:02:22:16	Standing		Head up	Ears forwards	Eyes closed	Tail in motion
PASTURE	1	1	afternoon	2018_07_24	2	13:02:22:17	13:02:23:16	Standing		Head up	Ears forwards	Eyes closed	Tail in motion
PASTURE	1	1	afternoon	2018_07_24	2	13:02:23:17	13:02:24:16	Standing		Head up	Ears forwards	Eyes closed	Tail in motion
PASTURE	1	1	afternoon	2018_07_24	2	13:02:24:17	13:02:25:16	Standing		Head up	Ears forwards	Eyes closed	Tail in motion
PASTURE	1	1	afternoon	2018_07_24	2	13:02:25:17	13:02:26:16	Standing		Head up	Ears forwards	Eyes closed	Tail in motion
PASTURE	1	1	afternoon	2018_07_24	2	13:02:26:17	13:02:27:16	Standing		Head up	Ears forwards	Eyes closed	Tail in motion
PASTURE	1	1	afternoon	2018_07_24	2	13:02:27:17	13:02:28:16	Standing		Head up	Ears forwards	Eyes closed	Tail in motion
PASTURE	1	1	afternoon	2018_07_24	2	13:02:28:17	13:02:29:16	Standing		Head up	Ears forwards	Eyes closed	Tail in motion
PASTURE	1	1	afternoon	2018_07_24	2	13:02:29:17	13:02:30:16	Standing		Head up	Ears forwards	Eyes closed	Tail in motion
PASTURE	1	1	afternoon	2018_07_24	2	13:02:30:17	13:02:31:16	Standing		Head up	Ears forwards	Eyes closed	Tail in motion
PASTURE	1	1	afternoon	2018_07_24	2	13:02:31:17	13:02:32:16	Standing		Head up	Ears forwards	Eyes closed	Tail in motion
PASTURE	1	1	afternoon	2018_07_24	2	13:02:32:17	13:02:33:16	Standing		Head up	Ears forwards	Eyes closed	Tail in motion
PASTURE	1	1	afternoon	2018_07_24	2	13:02:33:17	13:02:34:16	Standing		Head up	Ears forwards	Eyes closed	Tail in motion
PASTURE	1	1	afternoon	2018_07_24	2	13:02:34:17	13:02:35:16	Standing		Head up	Ears forwards	Eyes closed	Tail in motion
PASTURE	1	1	afternoon	2018_07_24	2	13:02:35:17	13:02:36:16	Standing		Head up	Ears forwards	Eyes closed	Tail in motion
PASTURE	1	1	afternoon	2018_07_24	2	13:02:36:17	13:02:37:16	Standing		Head up	Ears forwards	Eyes closed	Tail in motion
PASTURE	1	1	afternoon	2018_07_24	2	13:02:37:17	13:02:38:16	Standing		Head up	Ears forwards	Eyes closed	Tail in motion
PASTURE	1	1	afternoon	2018_07_24	2	13:02:38:17	13:02:39:16	Standing		Head up	Ears forwards	Eyes closed	Tail in motion
PASTURE	1	1	afternoon	2018_07_24	2	13:02:39:17	13:02:40:16	Standing		Head up	Ears forwards	Eyes closed	Tail in motion
PASTURE	1	1	afternoon	2018_07_24	2	13:02:40:17	13:02:41:16	Standing		Head up	Low ears	Eyes closed	Tail in motion
PASTURE	1	1	afternoon	2018_07_24	2	13:02:41:17	13:02:42:16	Standing		Head up	Low ears	Eyes closed	Tail in motion
PASTURE	1	1	afternoon	2018_07_24	2	13:02:42:17	13:02:43:16	Standing		Head up	Low ears	Eyes closed	Tail in motion
PASTURE	1	1	afternoon	2018_07_24	2	13:02:43:17	13:02:44:16	Standing		Head up	Low ears	Eyes closed	Tail in motion
PASTURE	1	1	afternoon	2018_07_24	2	13:02:44:17	13:02:45:16	Standing		Head up	Low ears	Eyes closed	Tail in motion
PASTURE	1	1	afternoon	2018_07_24	2	13:02:45:17	13:02:46:16	Standing		Head up	Low ears	Eyes closed	Tail in motion
PASTURE	1	1	afternoon	2018_07_24	2	13:02:46:17	13:02:47:16	Standing		Head up	Low ears	Eyes closed	Tail in motion
PASTURE	1	1	afternoon	2018_07_24	2	13:02:47:17	13:02:48:16	Standing		Head up	Low ears	Eyes closed	Tail in motion
PASTURE	1	1	afternoon	2018_07_24	2	13:02:48:17	13:02:49:16	Standing		Head up	Low ears	Eyes closed	Tail in motion
PASTURE	1	1	afternoon	2018_07_24	2	13:02:49:17	13:02:50:16	Standing		Head up	Low ears	Eyes closed	Tail in motion
PASTURE	1	1	afternoon	2018_07_24	2	13:02:50:17	13:02:51:16	Standing		Head up	Low ears	Eyes closed	Tail in motion
PASTURE	1	1	afternoon	2018_07_24	2	13:02:51:17	13:02:52:16	Standing		Head up	Low ears	Eyes closed	Tail in motion
PASTURE	1	1	afternoon	2018_07_24	2	13:02:52:17	13:02:53:16	Standing		Head up	Low ears	Eyes closed	Tail in motion
PASTURE	1	1	afternoon	2018_07_24	2	13:02:53:17	13:02:54:16	Standing		Head up	Low ears	Eyes closed	Tail in motion
PASTURE	1	1	afternoon	2018_07_24	2	13:02:54:17	13:02:55:16	Standing		Head up	Low ears	Eyes closed	Tail in motion
PASTURE	1	1	afternoon	2018_07_24	2	13:02:55:17	13:02:56:16	Standing		Head up	Low ears	Eyes closed	Tail in motion
PASTURE	1	1	afternoon	2018_07_24	2	13:02:56:17	13:02:57:16	Standing		Head up	Low ears	Eyes closed	Tail in motion
PASTURE	1	1	afternoon	2018_07_24	2	13:02:57:17	13:02:58:16	Standing		Head up	Low ears	Eyes closed	Tail in motion
PASTURE	1	1	afternoon	2018_07_24	2	13:02:58:17	13:02:59:16	Standing		Head up	Low ears	Eyes closed	Tail in motion
PASTURE	1	1	afternoon	2018_07_24	2	13:02:59:17	13:03:00:16	Standing		Head up	Low ears	Eyes closed	Tail in motion
PASTURE	1	1	afternoon	2018_07_24	2	13:03:00:17	13:03:01:16	Standing		Head up	Low ears	Eyes closed	Tail in motion
PASTURE	1	1	afternoon	2018_07_24	2	13:03:01:17	13:03:02:16	Standing		Head up	Low ears	Eyes closed	Tail in motion
PASTURE	1	1	afternoon	2018_07_24	2	13:03:02:17	13:03:03:16	Standing		Head up	Low ears	Eyes closed	Tail in motion
PASTURE	1	1	afternoon	2018_07_24	2	13:03:03:17	13:03:04:16	Standing		Head up	Low ears	Eyes closed	Tail in motion
PASTURE	1	1	afternoon	2018_07_24	2	13:03:04:17	13:03:05:16	Standing		Head up	Low ears	Eyes closed	Tail in motion
PASTURE	1	1	afternoon	2018_07_24	2	13:03:05:17	13:03:06:16	Standing		Head up	Low ears	Eyes closed	Tail in motion
PASTURE	1	1	afternoon	2018_07_24	2	13:03:06:17	13:03:07:16	Standing		Head up	Low ears	Eyes closed	Tail in motion
PASTURE	1	1	afternoon	2018_07_24	2	13:03:07:17	13:03:08:16	Standing		Head up	Low ears	Eyes closed	Tail in motion
PASTURE	1	1	afternoon	2018_07_24	2	13:03:08:17	13:03:09:16	Standing		Head up	Low ears	Eyes closed	Tail in motion
PASTURE	1	1	afternoon	2018_07_24	2	13:03:09:17	13:03:10:16	Standing		Head up	Low ears	Eyes closed	Tail in motion
PASTURE	1	1	afternoon	2018_07_24	2	13:03:10:17	13:03:11:16	Standing		Head up	Low ears	Eyes closed	Tail in motion
PASTURE	1	1	afternoon	2018_07_24	2	13:03:11:17	13:03:12:16	Standing		Head up	Low ears	Eyes closed	Tail in motion
PASTURE	1	1	afternoon	2018_07_24	2	13:03:12:17	13:03:13:16	Standing		Head up	Low ears	Eyes closed	Tail in motion
PASTURE	1	1	afternoon	2018_07_24	2	13:03:13:17	13:03:14:16	Standing		Head up	Low ears	Eyes closed	Tail in motion
PASTURE	1	1	afternoon	2018_07_24	2	13:03:14:17	13:03:15:16	Standing		Head up	Low ears	Eyes closed	Tail in motion
PASTURE	1	1	afternoon	2018_07_24	2	13:03:15:17	13:03:16:16	Standing		Head up	Low ears	Eyes closed	Tail in motion
PASTURE	1	1	afternoon	2018_07_24	2	13:03:16:17	13:03:17:16	Standing		Head up	Low ears	Eyes closed	Tail in motion
PASTURE	1	1	afternoon	2018_07_24	2	13:03:17:17	13:03:18:16	Standing		Head up	Low ears	Eyes closed	Tail in motion
PASTURE	1	1	afternoon	2018_07_24	2	13:03:18:17	13:03:19:16	Standing		Head up	Low ears	Eyes closed	Tail in motion
PASTURE	1	1	afternoon	2018_07_24	2	13:03:19:17	13:03:20:16	Standing		Head up	Low ears	Eyes closed	Tail in motion
PASTURE	1	1	afternoon	2018_07_24	2	13:03:20:17	13:03:21:16	Standing		Head up	Low ears	Eyes closed	Tail in motion
PASTURE	1	1	afternoon	2018_07_24	2	13:03:21:17	13:03:22:16	Standing		Head up	Low ears	Eyes closed	Tail in motion
PASTURE	1	1	afternoon	2018_07_24	2	13:03:22:17	13:03:23:16	Standing		Head up	Low ears	Eyes closed	Tail in motion
PASTURE	1	1	afternoon	2018_07_24	2	13:03:23:17	13:03:24:16	Standing		Head up	Low ears	Eyes closed	Tail in motion
PASTURE	1	1	afternoon	2018_07_24	2	13:03:24:17	13:03:25:16	Standing		Head up	Low ears	Eyes closed	Tail in motion
PASTURE	1	1	afternoon	2018_07_24	2	13:03:25:17	13:03:26:16	Standing		Head up	Low ears	Eyes closed	Tail in motion
PASTURE	1	1	afternoon	2018_07_24	2	13:03:26:17	13:03:27:16	Standing		Head up	Low ears	Eyes closed	Tail in motion
PASTURE	1	1	afternoon	2018_07_24	2	13:03:27:17	13:03:28:16	Standing		Head up	Low ears	Eyes closed	Tail in motion
PASTURE	1	1	afternoon	2018_07_24	2	13:03:28:17	13:03:29:16	Standing		Head up	Low ears	Eyes closed	Tail in motion
PASTURE	1	1	afternoon	2018_07_24	2	13:03:29:17	13:03:30:16	Standing		Head up	Low ears	Eyes closed	Tail in motion
PASTURE	1	1	afternoon	2018_07_24	2	13:03:30:17	13:03:31:16	Standing		Head up	Low ears	Eyes closed	Tail in motion
PASTURE	1	1	afternoon	2018_07_24	2	13:03:31:17	13:03:32:16	Standing		Head up	Low ears	Eyes closed	Tail in motion
PASTURE	1	1	afternoon	2018_07_24	2	13:03:32:17	13:03:33:16	Standing		Head up	Low ears	Eyes closed	Tail in motion
PASTURE	1	1	afternoon	2018_07_24	2	13:03:33:17	13:03:34:16	Standing		Head up	Low ears	Eyes closed	Tail in motion
PASTURE	1	1	afternoon	2018_07_24	2	13:03:34:17	13:03:35:16	Standing		Head up	Low ears	Eyes closed	Tail in motion
PASTURE	1	1	afternoon	2018_07_24	2	13:03:35:17	13:03:36:16	Standing		Head up	Low ears	Eyes closed	Tail in motion
PASTURE	1	1	afternoon	2018_07_24	2	13:03:36:17	13:03:37:16	Standing		Head up	Low ears	Eyes open	Tail in motion
PASTURE	1	1	afternoon	2018_07_24	2	13:03:37:17	13:03:38:16	Standing		Head up	Low ears	Eyes open	Tail in motion
PASTURE	1	1	afternoon	2018_07_24	2	13:03:38:17	13:03:39:16	Standing		Head up	Low ears	Eyes open	Tail in motion
PASTURE	1	1	afternoon	2018_07_24	2	13:03:39:17	13:03:40:16	Standing		Head up	Low ears	Eyes open	Tail in motion
PASTURE	1	1	afternoon	2018_07_24	2	13:03:40:17	13:03:41:16	Standing		Head up	Low ears	Eyes open	Tail in motion
PASTURE	1	1	afternoon	2018_07_24	2	13:03:41:17	13:03:42:16	Standing		Head up	Low ears	Eyes open	Tail in motion
PASTURE	1	1	afternoon	2018_07_24	2	13:03:42:17	13:03:43:16	Standing		Head up	Low ears	Eyes open	Tail in motion
PASTURE	1	1	afternoon	2018_07_24	2	13:03:43:17	13:03:44:16	Standing		Head up	Low ears	Eyes open	Tail in motion
PASTURE	1	1	afternoon	2018_07_24	2	13:03:44:17	13:03:45:16	Standing		Head up	Low ears	Eyes open	Tail in motion
PASTURE	1	1	afternoon	2018_07_24	2	13:03:45:17	13:03:46:16	Standing		Head up	Low ears	Eyes open	Tail in motion
PASTURE	1	1	afternoon	2018_07_24	2	13:03:46:17	13:03:47:16	Standing		Head up	Low ears	Eyes open	Tail in motion
PASTURE	1	1	afternoon	2018_07_24	2	13:03:47:17	13:03:48:16	Standing		Head up	Low ears	Eyes open	Tail in motion
PASTURE	1	1	afternoon	2018_07_24	2	13:03:48:17	13:03:49:16	Standing		Head up	Low ears	Eyes open	Tail hanging
PASTURE	1	1	afternoon	2018_07_24	2	13:03:49:17	13:03:50:16	Standing		Head up	Low ears	Eyes open	Tail hanging
PASTURE	1	1	afternoon	2018_07_24	2	13:03:50:17	13:03:51:16	Standing		Head up	Low ears	Eyes open	Tail hanging
PASTURE	1	1	afternoon	2018_07_24	2	13:03:51:17	13:03:52:16	Standing		Head up	Low ears	Eyes open	Tail hanging
PASTURE	1	1	afternoon	2018_07_24	2	13:03:52:17	13:03:53:16	Standing		Head up	Low ears	Eyes open	Tail hanging
PASTURE	1	1	afternoon	2018_07_24	2	13:03:53:17	13:03:54:16	Standing		Head up	Low ears	Eyes open	Tail hanging
PASTURE	1	1	afternoon	2018_07_24	2	13:03:54:17	13:03:55:16	Standing		Head up	Low ears	Eyes open	Tail hanging
PASTURE	1	1	afternoon	2018_07_24	2	13:04:36:17	13:04:37:16	Standing		Head up	Ears forwards	Eyes open	Tail hanging
PASTURE	1	1	afternoon	2018_07_24	2	13:04:37:17	13:04:38:16	Standing		Head up	Ears forwards	Eyes open	Tail hanging
PASTURE	1	1	afternoon	2018_07_24	2	13:04:38:17	13:04:39:16	Standing		Head up	Ears forwards	Eyes open	Tail hanging
PASTURE	1	1	afternoon	2018_07_24	2	13:04:39:17	13:04:40:16	Standing		Head up	Ears forwards	Eyes open	Tail hanging
PASTURE	1	1	afternoon	2018_07_24	2	13:04:40:17	13:04:41:16	Standing		Head up	Ears forwards	Eyes open	Tail hanging
PASTURE	1	1	afternoon	2018_07_24	2	13:05:16:17	13:05:17:16	Standing		Head up	Ears forwards	Eyes open	Tail hanging
PASTURE	1	1	afternoon	2018_07_24	2	13:05:17:17	13:05:18:16	Standing		Head up	Ears forwards	Eyes open	Tail hanging
PASTURE	1	1	afternoon	2018_07_24	2	13:05:18:17	13:05:19:16	Standing		Head up	Ears forwards	Eyes open	Tail hanging
PASTURE	1	1	afternoon	2018_07_24	2	13:05:19:17	13:05:20:16	Standing		Head up	Ears forwards	Eyes open	Tail hanging
PASTURE	1	1	afternoon	2018_07_24	2	13:05:20:17	13:05:21:16	Standing		Head up	Ears forwards	Eyes open	Tail hanging
PASTURE	1	1	afternoon	2018_07_24	2	13:05:21:17	13:05:22:16	Standing		Head up	Ears forwards	Eyes open	Tail hanging
PASTURE	1	1	afternoon	2018_07_24	2	13:05:22:17	13:05:23:16	Standing		Head up	Ears forwards	Eyes open	Tail hanging
PASTURE	1	1	afternoon	2018_07_24	2	13:05:23:17	13:05:24:16	Standing		Head up	Ears forwards	Eyes open	Tail hanging
PASTURE	1	1	afternoon	2018_07_24	2	13:05:24:17	13:05:25:16	Standing		Head up	Ears forwards	Eyes open	Tail in motion
PASTURE	1	1	afternoon	2018_07_24	2	13:05:25:17	13:05:26:16	Standing		Head up	Ears forwards	Eyes open	Tail in motion
PASTURE	1	1	afternoon	2018_07_24	2	13:05:26:17	13:05:27:16	Standing		Head up	Ears forwards	Eyes open	Tail in motion
PASTURE	1	1	afternoon	2018_07_24	2	13:05:27:17	13:05:28:16	Standing		Head up	Ears forwards	Eyes open	Tail in motion
PASTURE	1	1	afternoon	2018_07_24	2	13:05:28:17	13:05:29:16	Standing		Head up	Ears forwards	Eyes open	Tail in motion
PASTURE	1	1	afternoon	2018_07_24	2	13:05:29:17	13:05:30:16	Standing		Head up	Ears forwards	Eyes open	Tail in motion
PASTURE	1	1	afternoon	2018_07_24	2	13:05:30:17	13:05:31:16	Standing		Head up	Ears forwards	Eyes open	Tail in motion
PASTURE	1	1	afternoon	2018_07_24	2	13:05:31:17	13:05:32:16	Standing		Head up	Ears forwards	Eyes open	Tail in motion
PASTURE	1	1	afternoon	2018_07_24	2	13:05:32:17	13:05:33:16	Standing		Head up	Ears forwards	Eyes open	Tail in motion
PASTURE	1	1	afternoon	2018_07_24	2	13:05:33:17	13:05:34:16	Standing		Head up	Ears forwards	Eyes open	Tail in motion
PASTURE	1	1	afternoon	2018_07_24	2	13:05:34:17	13:05:35:16	Standing		Head up	Ears forwards	Eyes open	Tail in motion
PASTURE	1	1	afternoon	2018_07_24	2	13:05:35:17	13:05:36:16	Standing		Head up	Ears forwards	Eyes open	Tail in motion
PASTURE	1	1	afternoon	2018_07_24	2	13:05:36:17	13:05:37:16	Standing		Head up	Ears forwards	Eyes open	Tail in motion
PASTURE	1	1	afternoon	2018_07_24	2	13:05:37:17	13:05:38:16	Standing		Head up	Ears forwards	Eyes open	Tail in motion
PASTURE	1	1	afternoon	2018_07_24	2	13:05:38:17	13:05:39:16	Standing		Head up	Ears forwards	Eyes open	Tail in motion
PASTURE	1	1	afternoon	2018_07_24	2	13:05:39:17	13:05:40:16	Standing		Head up	Ears forwards	Eyes open	Tail in motion
PASTURE	1	1	afternoon	2018_07_24	2	13:05:40:17	13:05:41:16	Standing		Head up	Ears forwards	Eyes open	Tail in motion
PASTURE	1	1	afternoon	2018_07_24	2	13:05:41:17	13:05:42:16	Standing		Head up	Ears forwards	Eyes open	Tail in motion
PASTURE	1	1	afternoon	2018_07_24	2	13:05:42:17	13:05:43:16	Standing		Head up	Ears forwards	Eyes open	Tail in motion
PASTURE	1	1	afternoon	2018_07_24	2	13:05:43:17	13:05:44:16	Standing		Head up	Ears forwards	Eyes open	Tail in motion
PASTURE	1	1	afternoon	2018_07_24	2	13:05:44:17	13:05:45:16	Standing		Head up	Ears forwards	Eyes open	Tail in motion
PASTURE	1	1	afternoon	2018_07_24	2	13:05:45:17	13:05:46:16	Standing		Head up	Ears forwards	Eyes open	Tail in motion
PASTURE	1	1	afternoon	2018_07_24	2	13:05:46:17	13:05:47:16	Standing		Head up	Ears forwards	Eyes open	Tail in motion
PASTURE	1	1	afternoon	2018_07_24	2	13:05:47:17	13:05:48:16	Standing		Head up	Ears forwards	Eyes open	Tail in motion
PASTURE	1	1	afternoon	2018_07_24	2	13:05:48:17	13:05:49:16	Standing		Head up	Ears forwards	Eyes open	Tail in motion
PASTURE	1	1	afternoon	2018_07_24	2	13:05:49:17	13:05:50:16	Standing		Head up	Ears forwards	Eyes open	Tail in motion
PASTURE	1	1	afternoon	2018_07_24	2	13:05:50:17	13:05:51:16	Standing		Head up	Ears forwards	Eyes open	Tail in motion
PASTURE	1	1	afternoon	2018_07_24	2	13:05:51:17	13:05:52:16	Standing		Head up	Ears forwards	Eyes open	Tail in motion
PASTURE	1	1	afternoon	2018_07_24	2	13:05:52:17	13:05:53:16	Standing		Head up	Ears forwards	Eyes open	Tail in motion
PASTURE	1	1	afternoon	2018_07_24	2	13:05:53:17	13:05:54:16	Standing		Head up	Ears forwards	Eyes open	Tail in motion
PASTURE	1	1	afternoon	2018_07_24	2	13:05:54:17	13:05:55:16	Standing		Head up	Ears forwards	Eyes open	Tail in motion
PASTURE	1	1	afternoon	2018_07_24	2	13:05:55:17	13:05:56:16	Standing		Head up	Ears forwards	Eyes open	Tail in motion
PASTURE	1	1	afternoon	2018_07_24	2	13:05:56:17	13:05:57:16	Standing		Head up	Ears forwards	Eyes open	Tail in motion
PASTURE	1	1	afternoon	2018_07_24	2	13:05:57:17	13:05:58:16	Standing		Head up	Ears forwards	Eyes open	Tail in motion
PASTURE	1	1	afternoon	2018_07_24	2	13:05:58:17	13:05:59:16	Standing		Head up	Ears forwards	Eyes open	Tail in motion
PASTURE	1	1	afternoon	2018_07_24	2	13:05:59:17	13:06:00:16	Standing		Head up	Ears forwards	Eyes open	Tail in motion
PASTURE	1	1	afternoon	2018_07_24	2	13:06:00:17	13:06:01:16	Standing		Head up	Ears forwards	Eyes open	Tail in motion
PASTURE	1	1	afternoon	2018_07_24	2	13:06:01:17	13:06:02:16	Standing		Head up	Ears forwards	Eyes open	Tail in motion
PASTURE	1	1	afternoon	2018_07_24	2	13:06:02:17	13:06:03:16	Standing		Head up	Ears forwards	Eyes open	Tail in motion
PASTURE	1	1	afternoon	2018_07_24	2	13:06:03:17	13:06:04:16	Standing		Head up	Ears forwards	Eyes open	Tail in motion
PASTURE	1	1	afternoon	2018_07_24	2	13:06:04:17	13:06:05:16	Standing		Head up	Ears forwards	Eyes open	Tail in motion
PASTURE	1	1	afternoon	2018_07_24	2	13:06:05:17	13:06:06:16	Standing		Head up	Ears forwards	Eyes open	Tail hanging
PASTURE	1	1	afternoon	2018_07_24	2	13:06:06:17	13:06:07:16	Standing		Head up	Ears forwards	Eyes open	Tail hanging
PASTURE	1	1	afternoon	2018_07_24	2	13:06:07:17	13:06:08:16	Standing		Head up	Ears forwards	Eyes open	Tail hanging
PASTURE	1	1	afternoon	2018_07_24	2	13:06:08:17	13:06:09:16	Standing		Head up	Ears forwards	Eyes open	Tail hanging
PASTURE	1	1	afternoon	2018_07_24	2	13:06:09:17	13:06:10:16	Standing		Head up	Ears forwards	Eyes open	Tail hanging
PASTURE	1	1	afternoon	2018_07_24	2	13:06:10:17	13:06:11:16	Standing		Head up	Ears forwards	Eyes open	Tail hanging
PASTURE	1	1	afternoon	2018_07_24	2	13:06:11:17	13:06:12:16	Standing		Head up	Ears forwards	Eyes open	Tail in motion
PASTURE	1	1	afternoon	2018_07_24	2	13:06:12:17	13:06:13:16	Standing		Head up	Ears forwards	Eyes open	Tail in motion
PASTURE	1	1	afternoon	2018_07_24	2	13:06:13:17	13:06:14:16	Standing		Head up	Ears forwards	Eyes open	Tail in motion
PASTURE	1	1	afternoon	2018_07_24	2	13:06:14:17	13:06:15:16	Standing		Head up	Ears forwards	Eyes open	Tail in motion
PASTURE	1	1	afternoon	2018_07_24	2	13:06:15:17	13:06:16:16	Standing		Head up	Ears forwards	Eyes open	Tail in motion
PASTURE	1	1	afternoon	2018_07_24	2	13:06:16:17	13:06:17:16	Standing		Head up	Ears forwards	Eyes open	Tail in motion
PASTURE	1	1	afternoon	2018_07_24	2	13:06:17:17	13:06:18:16	Standing		Head up	Ears forwards	Eyes open	Tail in motion
PASTURE	1	1	afternoon	2018_07_24	2	13:06:18:17	13:06:19:16	Standing		Head up	Ears forwards	Eyes open	Tail in motion
PASTURE	1	1	afternoon	2018_07_24	2	13:06:19:17	13:06:20:16	Standing		Head up	Ears forwards	Eyes open	Tail in motion
PASTURE	1	1	afternoon	2018_07_24	2	13:06:20:17	13:06:21:16	Standing		Head up	Ears forwards	Eyes open	Tail in motion
PASTURE	1	1	afternoon	2018_07_24	2	13:06:21:17	13:06:22:16	Standing		Head up	Ears forwards	Eyes open	Tail in motion
PASTURE	1	1	afternoon	2018_07_24	2	13:06:22:17	13:06:23:16	Standing		Head up	Ears forwards	Eyes open	Tail in motion
PASTURE	1	1	afternoon	2018_07_24	2	13:06:23:17	13:06:24:16	Standing		Head up	Ears forwards	Eyes open	Tail in motion
PASTURE	1	1	afternoon	2018_07_24	2	13:06:24:17	13:06:25:16	Standing		Head up	Ears forwards	Eyes open	Tail in motion
PASTURE	1	1	afternoon	2018_07_24	2	13:06:25:17	13:06:26:16	Standing		Head up	Ears forwards	Eyes open	Tail in motion
PASTURE	1	1	afternoon	2018_07_24	2	13:06:26:17	13:06:27:16	Standing		Head up	Ears forwards	Eyes open	Tail in motion
PASTURE	1	1	afternoon	2018_07_24	2	13:07:49:17	13:07:50:16	Standing		Head up	Ears forwards	Eyes open	Tail hanging
PASTURE	1	1	afternoon	2018_07_24	2	13:07:50:17	13:07:51:16	Standing		Head up	Ears forwards	Eyes open	Tail hanging
PASTURE	1	1	afternoon	2018_07_24	2	13:07:51:17	13:07:52:16	Standing		Head up	Ears forwards	Eyes open	Tail hanging
PASTURE	1	1	afternoon	2018_07_24	2	13:07:52:17	13:07:53:16	Standing		Head up	Ears forwards	Eyes open	Tail hanging
PASTURE	1	1	afternoon	2018_07_24	2	13:07:53:17	13:07:54:16	Standing		Head up	Ears forwards	Eyes open	Tail hanging
PASTURE	1	1	afternoon	2018_07_24	3	13:15:22:17	13:15:23:16	Standing		Head up	Ears forwards	Eyes open	Tail hanging
PASTURE	1	1	afternoon	2018_07_24	3	13:15:23:17	13:15:24:16	Standing		Head up	Ears forwards	Eyes open	Tail hanging
PASTURE	1	1	afternoon	2018_07_24	3	13:15:24:17	13:15:25:16	Standing		Head up	Ears forwards	Eyes open	Tail hanging
PASTURE	1	1	afternoon	2018_07_24	3	13:15:25:17	13:15:26:16	Standing		Head up	Ears forwards	Eyes open	Tail hanging
PASTURE	1	1	afternoon	2018_07_24	3	13:15:26:17	13:15:27:16	Standing		Head up	Ears forwards	Eyes open	Tail hanging
PASTURE	1	1	afternoon	2018_07_24	3	13:15:27:17	13:15:28:16	Standing		Head up	Ears forwards	Eyes open	Tail hanging
PASTURE	1	1	afternoon	2018_07_24	3	13:15:28:17	13:15:29:16	Standing		Head up	Ears forwards	Eyes open	Tail hanging
PASTURE	1	1	afternoon	2018_07_24	3	13:15:29:17	13:15:30:16	Standing		Head up	Ears forwards	Eyes open	Tail hanging
PASTURE	1	1	afternoon	2018_07_24	3	13:15:30:17	13:15:31:16	Standing		Head up	Ears forwards	Eyes open	Tail hanging
PASTURE	1	1	afternoon	2018_07_24	3	13:15:31:17	13:15:32:16	Standing		Head up	Ears forwards	Eyes open	Tail hanging
PASTURE	1	1	afternoon	2018_07_24	3	13:15:32:17	13:15:33:16	Standing		Head up	Ears forwards	Eyes open	Tail hanging
PASTURE	1	1	afternoon	2018_07_24	3	13:15:33:17	13:15:34:16	Standing		Head up	Ears forwards	Eyes open	Tail in motion
PASTURE	1	1	afternoon	2018_07_24	3	13:15:34:17	13:15:35:16	Standing		Head up	Ears forwards	Eyes open	Tail in motion
PASTURE	1	1	afternoon	2018_07_24	3	13:15:35:17	13:15:36:16	Standing		Head up	Ears forwards	Eyes open	Tail in motion
PASTURE	1	1	afternoon	2018_07_24	3	13:15:36:17	13:15:37:16	Standing		Head up	Ears forwards	Eyes open	Tail in motion
PASTURE	1	1	afternoon	2018_07_24	3	13:15:37:17	13:15:38:16	Standing		Head up	Ears forwards	Eyes open	Tail in motion
PASTURE	1	1	afternoon	2018_07_24	3	13:15:38:17	13:15:39:16	Standing		Head up	Ears forwards	Eyes open	Tail in motion
PASTURE	1	1	afternoon	2018_07_24	3	13:15:39:17	13:15:40:16	Standing		Head up	Ears forwards	Eyes open	Tail in motion
PASTURE	1	1	afternoon	2018_07_24	3	13:15:40:17	13:15:41:16	Standing		Head up	Ears forwards	Eyes open	Tail in motion
PASTURE	1	1	afternoon	2018_07_24	3	13:15:41:17	13:15:42:16	Standing		Head up	Ears forwards	Eyes open	Tail in motion
PASTURE	1	1	afternoon	2018_07_24	3	13:15:42:17	13:15:43:16	Standing		Head up	Ears forwards	Eyes open	Tail in motion
PASTURE	1	1	afternoon	2018_07_24	3	13:15:43:17	13:15:44:16	Standing		Head up	Ears forwards	Eyes open	Tail in motion
PASTURE	1	1	afternoon	2018_07_24	3	13:15:44:17	13:15:45:16	Standing		Head up	Ears forwards	Eyes open	Tail in motion
PASTURE	1	1	afternoon	2018_07_24	3	13:15:45:17	13:15:46:16	Standing		Head up	Ears forwards	Eyes open	Tail in motion
PASTURE	1	1	afternoon	2018_07_24	3	13:15:46:17	13:15:47:16	Standing		Head up	Ears forwards	Eyes open	Tail in motion
PASTURE	1	1	afternoon	2018_07_24	3	13:15:47:17	13:15:48:16	Standing		Head up	Ears forwards	Eyes open	Tail in motion
PASTURE	1	1	afternoon	2018_07_24	3	13:15:48:17	13:15:49:16	Standing		Head up	Ears forwards	Eyes open	Tail in motion
PASTURE	1	1	afternoon	2018_07_24	3	13:15:49:17	13:15:50:16	Standing		Head up	Ears forwards	Eyes open	Tail hanging
PASTURE	1	1	afternoon	2018_07_24	3	13:15:50:17	13:15:51:16	Standing		Head up	Ears forwards	Eyes open	Tail hanging
PASTURE	1	1	afternoon	2018_07_24	3	13:15:51:17	13:15:52:16	Standing		Head up	Ears forwards	Eyes open	Tail hanging
PASTURE	1	1	afternoon	2018_07_24	3	13:15:52:17	13:15:53:16	Standing		Head up	Ears forwards	Eyes open	Tail hanging
PASTURE	1	1	afternoon	2018_07_24	3	13:15:53:17	13:15:54:16	Standing		Head up	Ears forwards	Eyes open	Tail hanging
PASTURE	1	1	afternoon	2018_07_24	3	13:15:54:17	13:15:55:16	Standing		Head up	Ears forwards	Eyes open	Tail hanging
PASTURE	1	1	afternoon	2018_07_24	3	13:15:55:17	13:15:56:16	Standing		Head up	Ears forwards	Eyes open	Tail hanging
PASTURE	1	1	afternoon	2018_07_24	3	13:15:56:17	13:15:57:16	Standing		Head up	Ears asymmetrical	Eyes open	Tail hanging
PASTURE	1	1	afternoon	2018_07_24	3	13:15:57:17	13:15:58:16	Standing		Head up	Ears asymmetrical	Eyes open	Tail hanging
PASTURE	1	1	afternoon	2018_07_24	3	13:15:58:17	13:15:59:16	Standing		Head up	Ears asymmetrical	Eyes open	Tail hanging
PASTURE	1	1	afternoon	2018_07_24	3	13:15:59:17	13:16:00:16	Standing		Head up	Ears asymmetrical	Eyes open	Tail hanging
PASTURE	1	1	afternoon	2018_07_24	3	13:16:00:17	13:16:01:16	Standing		Head up	Ears asymmetrical	Eyes open	Tail hanging
PASTURE	1	1	afternoon	2018_07_24	3	13:16:01:17	13:16:02:16	Standing		Head up	Ears asymmetrical	Eyes open	Tail hanging
PASTURE	1	1	afternoon	2018_07_24	3	13:16:02:17	13:16:03:16	Standing		Head up	Ears asymmetrical	Eyes open	Tail hanging
PASTURE	1	1	afternoon	2018_07_24	3	13:16:03:17	13:16:04:16	Standing		Head up	Ears asymmetrical	Eyes open	Tail hanging
PASTURE	1	1	afternoon	2018_07_24	3	13:16:04:17	13:16:05:16	Standing		Head up	Ears asymmetrical	Eyes open	Tail hanging
PASTURE	1	1	afternoon	2018_07_24	3	13:16:05:17	13:16:06:16	Standing		Head up	Ears asymmetrical	Eyes open	Tail hanging
PASTURE	1	1	afternoon	2018_07_24	3	13:16:06:17	13:16:07:16	Standing		Head up	Ears asymmetrical	Eyes open	Tail hanging
PASTURE	1	1	afternoon	2018_07_24	3	13:16:07:17	13:16:08:16	Standing		Head up	Ears asymmetrical	Eyes open	Tail hanging
PASTURE	1	1	afternoon	2018_07_24	3	13:16:08:17	13:16:09:16	Standing		Head up	Ears asymmetrical	Eyes open	Tail hanging
PASTURE	1	1	afternoon	2018_07_24	3	13:16:09:17	13:16:10:16	Standing		Head up	Ears asymmetrical	Eyes open	Tail hanging
PASTURE	1	1	afternoon	2018_07_24	3	13:16:10:17	13:16:11:16	Standing		Head up	Ears asymmetrical	Eyes open	Tail hanging
PASTURE	1	1	afternoon	2018_07_24	3	13:16:11:17	13:16:12:16	Standing		Head up	Ears asymmetrical	Eyes open	Tail hanging
PASTURE	1	1	afternoon	2018_07_24	3	13:16:12:17	13:16:13:16	Standing		Head up	Ears asymmetrical	Eyes open	Tail hanging
PASTURE	1	1	afternoon	2018_07_24	3	13:16:13:17	13:16:14:16	Standing		Head up	Ears asymmetrical	Eyes open	Tail hanging
PASTURE	1	1	afternoon	2018_07_24	3	13:16:14:17	13:16:15:16	Standing		Head up	Ears asymmetrical	Eyes open	Tail hanging
PASTURE	1	1	afternoon	2018_07_24	3	13:16:15:17	13:16:16:16	Standing		Head up	Ears asymmetrical	Eyes open	Tail hanging
PASTURE	1	1	afternoon	2018_07_24	3	13:16:16:17	13:16:17:16	Standing		Head up	Ears asymmetrical	Eyes open	Tail hanging
PASTURE	1	1	afternoon	2018_07_24	3	13:16:17:17	13:16:18:16	Standing		Head up	Ears asymmetrical	Eyes open	Tail hanging
PASTURE	1	1	afternoon	2018_07_24	3	13:16:18:17	13:16:19:16	Standing		Head up	Ears asymmetrical	Eyes open	Tail hanging
PASTURE	1	1	afternoon	2018_07_24	3	13:16:19:17	13:16:20:16	Standing		Head up	Ears asymmetrical	Eyes open	Tail hanging
PASTURE	1	1	afternoon	2018_07_24	3	13:16:20:17	13:16:21:16	Standing		Head up	Ears asymmetrical	Eyes open	Tail hanging
PASTURE	1	1	afternoon	2018_07_24	3	13:16:21:17	13:16:22:16	Standing		Head up	Ears asymmetrical	Eyes open	Tail hanging
PASTURE	1	1	afternoon	2018_07_24	3	13:16:22:17	13:16:23:16	Standing		Head up	Ears asymmetrical	Eyes open	Tail in motion
PASTURE	1	1	afternoon	2018_07_24	3	13:16:23:17	13:16:24:16	Standing		Head up	Ears asymmetrical	Eyes open	Tail in motion
PASTURE	1	1	afternoon	2018_07_24	3	13:16:24:17	13:16:25:16	Standing		Head up	Ears asymmetrical	Eyes open	Tail in motion
PASTURE	1	1	afternoon	2018_07_24	3	13:16:25:17	13:16:26:16	Standing		Head up	Ears asymmetrical	Eyes open	Tail in motion
PASTURE	1	1	afternoon	2018_07_24	3	13:16:26:17	13:16:27:16	Standing		Head up	Ears asymmetrical	Eyes open	Tail in motion
PASTURE	1	1	afternoon	2018_07_24	3	13:16:27:17	13:16:28:16	Standing		Head up	Ears asymmetrical	Eyes open	Tail in motion
PASTURE	1	1	afternoon	2018_07_24	3	13:16:28:17	13:16:29:16	Standing		Head up	Ears asymmetrical	Eyes open	Tail in motion
PASTURE	1	1	afternoon	2018_07_24	3	13:16:29:17	13:16:30:16	Standing		Head up	Ears asymmetrical	Eyes open	Tail in motion
PASTURE	1	1	afternoon	2018_07_24	3	13:16:30:17	13:16:31:16	Standing		Head up	Ears asymmetrical	Eyes open	Tail in motion
PASTURE	1	1	afternoon	2018_07_24	3	13:16:31:17	13:16:32:16	Standing		Head up	Ears asymmetrical	Eyes open	Tail in motion
PASTURE	1	1	afternoon	2018_07_24	3	13:16:32:17	13:16:33:16	Standing		Head up	Ears backwards	Eyes open	Tail in motion
PASTURE	1	1	afternoon	2018_07_24	3	13:16:33:17	13:16:34:16	Standing		Head up	Ears backwards	Eyes open	Tail in motion
PASTURE	1	1	afternoon	2018_07_24	3	13:16:34:17	13:16:35:16	Standing		Head up	Ears backwards	Eyes open	Tail in motion
PASTURE	1	1	afternoon	2018_07_24	3	13:16:35:17	13:16:36:16	Standing		Head up	Ears backwards	Eyes open	Tail in motion
PASTURE	1	1	afternoon	2018_07_24	3	13:16:36:17	13:16:37:16	Standing		Head up	Ears backwards	Eyes open	Tail in motion
PASTURE	1	1	afternoon	2018_07_24	3	13:16:37:17	13:16:38:16	Standing		Head up	Ears backwards	Eyes open	Tail in motion
PASTURE	1	1	afternoon	2018_07_24	3	13:16:38:17	13:16:39:16	Standing		Head up	Ears backwards	Eyes open	Tail in motion
PASTURE	1	1	afternoon	2018_07_24	3	13:16:39:17	13:16:40:16	Standing		Head up	Ears backwards	Eyes open	Tail in motion
PASTURE	1	1	afternoon	2018_07_24	3	13:16:40:17	13:16:41:16	Standing		Head up	Ears backwards	Eyes open	Tail in motion
PASTURE	1	1	afternoon	2018_07_24	3	13:16:41:17	13:16:42:16	Standing		Head up	Ears backwards	Eyes open	Tail in motion
PASTURE	1	1	afternoon	2018_07_24	3	13:16:42:17	13:16:43:16	Standing		Head up	Ears backwards	Eyes open	Tail in motion
PASTURE	1	1	afternoon	2018_07_24	3	13:16:43:17	13:16:44:16	Standing		Head up	Ears backwards	Eyes open	Tail in motion
PASTURE	1	1	afternoon	2018_07_24	3	13:16:44:17	13:16:45:16	Standing		Head up	Ears backwards	Eyes open	Tail in motion
PASTURE	1	1	afternoon	2018_07_24	3	13:16:45:17	13:16:46:16	Standing		Head up	Ears backwards	Eyes open	Tail in motion
PASTURE	1	1	afternoon	2018_07_24	3	13:16:46:17	13:16:47:16	Standing		Head up	Ears backwards	Eyes open	Tail in motion
PASTURE	1	1	afternoon	2018_07_24	3	13:16:47:17	13:16:48:16	Standing		Head up	Ears backwards	Eyes open	Tail in motion
PASTURE	1	1	afternoon	2018_07_24	3	13:16:48:17	13:16:49:16	Standing		Head up	Ears backwards	Eyes open	Tail in motion
PASTURE	1	1	afternoon	2018_07_24	3	13:16:49:17	13:16:50:16	Standing		Head up	Ears backwards	Eyes open	Tail in motion
PASTURE	1	1	afternoon	2018_07_24	3	13:16:50:17	13:16:51:16	Standing		Head up	Ears backwards	Eyes open	Tail in motion
PASTURE	1	1	afternoon	2018_07_24	3	13:16:51:17	13:16:52:16	Standing		Head up	Ears backwards	Eyes open	Tail in motion
PASTURE	1	1	afternoon	2018_07_24	3	13:16:52:17	13:16:53:16	Standing		Head up	Ears backwards	Eyes open	Tail in motion
PASTURE	1	1	afternoon	2018_07_24	3	13:16:53:17	13:16:54:16	Standing		Head up	Ears backwards	Eyes open	Tail in motion
PASTURE	1	1	afternoon	2018_07_24	3	13:16:54:17	13:16:55:16	Standing		Head up	Ears backwards	Eyes open	Tail in motion
PASTURE	1	1	afternoon	2018_07_24	3	13:16:55:17	13:16:56:16	Standing		Head up	Ears backwards	Eyes open	Tail in motion
PASTURE	1	1	afternoon	2018_07_24	3	13:16:56:17	13:16:57:16	Standing		Head up	Ears backwards	Eyes open	Tail in motion
PASTURE	1	1	afternoon	2018_07_24	3	13:16:57:17	13:16:58:16	Standing		Head up	Ears backwards	Eyes open	Tail in motion
PASTURE	1	1	afternoon	2018_07_24	3	13:16:58:17	13:16:59:16	Standing		Head up	Ears backwards	Eyes open	Tail in motion
PASTURE	1	1	afternoon	2018_07_24	3	13:16:59:17	13:17:00:16	Standing		Head up	Ears backwards	Eyes open	Tail in motion
PASTURE	1	1	afternoon	2018_07_24	3	13:17:00:17	13:17:01:16	Standing		Head up	Ears backwards	Eyes open	Tail in motion
PASTURE	1	1	afternoon	2018_07_24	3	13:17:01:17	13:17:02:16	Standing		Head up	Ears backwards	Eyes open	Tail in motion
PASTURE	1	1	afternoon	2018_07_24	3	13:17:02:17	13:17:03:16	Standing		Head up	Ears backwards	Eyes open	Tail in motion
PASTURE	1	1	afternoon	2018_07_24	3	13:17:03:17	13:17:04:16	Standing		Head up	Ears backwards	Eyes open	Tail in motion
PASTURE	1	1	afternoon	2018_07_24	3	13:17:04:17	13:17:05:16	Standing		Head up	Ears backwards	Eyes open	Tail in motion
PASTURE	1	1	afternoon	2018_07_24	3	13:17:05:17	13:17:06:16	Standing		Head up	Ears backwards	Eyes open	Tail in motion
PASTURE	1	1	afternoon	2018_07_24	3	13:17:06:17	13:17:07:16	Standing		Head up	Ears backwards	Eyes open	Tail in motion
PASTURE	1	1	afternoon	2018_07_24	3	13:17:07:17	13:17:08:16	Standing		Head up	Ears backwards	Eyes open	Tail in motion
PASTURE	1	1	afternoon	2018_07_24	3	13:17:08:17	13:17:09:16	Standing		Head up	Ears backwards	Eyes open	Tail in motion
PASTURE	1	1	afternoon	2018_07_24	3	13:17:09:17	13:17:10:16	Standing		Head up	Ears backwards	Eyes open	Tail in motion
PASTURE	1	1	afternoon	2018_07_24	3	13:17:10:17	13:17:11:16	Standing		Head up	Ears backwards	Eyes open	Tail in motion
PASTURE	1	1	afternoon	2018_07_24	3	13:17:11:17	13:17:12:16	Standing		Head up	Ears backwards	Eyes open	Tail in motion
PASTURE	1	1	afternoon	2018_07_24	3	13:17:12:17	13:17:13:16	Standing		Head up	Ears backwards	Eyes open	Tail in motion
PASTURE	1	1	afternoon	2018_07_24	3	13:17:13:17	13:17:14:16	Standing		Head up	Ears backwards	Eyes open	Tail in motion
PASTURE	1	1	afternoon	2018_07_24	3	13:17:14:17	13:17:15:16	Standing		Head up	Ears backwards	Eyes open	Tail in motion
PASTURE	1	1	afternoon	2018_07_24	3	13:17:15:17	13:17:16:16	Standing		Head up	Ears backwards	Eyes open	Tail in motion
PASTURE	1	1	afternoon	2018_07_24	3	13:17:16:17	13:17:17:16	Standing		Head up	Ears backwards	Eyes open	Tail in motion
PASTURE	1	1	afternoon	2018_07_24	3	13:17:17:17	13:17:18:16	Standing		Head up	Ears backwards	Eyes open	Tail in motion
PASTURE	1	1	afternoon	2018_07_24	3	13:17:18:17	13:17:19:16	Standing		Head up	Ears backwards	Eyes open	Tail in motion
PASTURE	1	1	afternoon	2018_07_24	3	13:17:19:17	13:17:20:16	Standing		Head up	Ears backwards	Eyes open	Tail in motion
PASTURE	1	1	afternoon	2018_07_24	3	13:17:20:17	13:17:21:16	Standing		Head up	Ears backwards	Eyes open	Tail in motion
PASTURE	1	1	afternoon	2018_07_24	3	13:17:21:17	13:17:22:16	Standing		Head up	Ears backwards	Eyes open	Tail in motion
PASTURE	1	1	afternoon	2018_07_24	3	13:17:22:17	13:17:23:16	Standing		Head up	Ears backwards	Eyes open	Tail in motion
PASTURE	1	1	afternoon	2018_07_24	3	13:17:23:17	13:17:24:16	Standing		Head up	Ears backwards	Eyes open	Tail in motion
PASTURE	1	1	afternoon	2018_07_24	3	13:17:24:17	13:17:25:16	Standing		Head up	Ears backwards	Eyes open	Tail in motion
PASTURE	1	1	afternoon	2018_07_24	3	13:17:25:17	13:17:26:16	Standing		Head up	Ears backwards	Eyes open	Tail in motion
PASTURE	1	1	afternoon	2018_07_24	3	13:17:26:17	13:17:27:16	Standing		Head up	Ears backwards	Eyes open	Tail in motion
PASTURE	1	1	afternoon	2018_07_24	3	13:17:27:17	13:17:28:16	Standing		Head up	Ears backwards	Eyes open	Tail in motion
PASTURE	1	1	afternoon	2018_07_24	3	13:17:28:17	13:17:29:16	Standing		Head up	Ears backwards	Eyes open	Tail in motion
PASTURE	1	1	afternoon	2018_07_24	3	13:17:29:17	13:17:30:16	Standing		Head up	Ears backwards	Eyes open	Tail in motion
PASTURE	1	1	afternoon	2018_07_24	3	13:17:30:17	13:17:31:16	Standing		Head up	Ears backwards	Eyes open	Tail in motion
PASTURE	1	1	afternoon	2018_07_24	3	13:17:31:17	13:17:32:16	Standing		Head up	Ears backwards	Eyes open	Tail in motion
PASTURE	1	1	afternoon	2018_07_24	3	13:17:32:17	13:17:33:16	Standing		Head up	Ears backwards	Eyes open	Tail in motion
PASTURE	1	1	afternoon	2018_07_24	3	13:17:33:17	13:17:34:16	Standing		Head up	Ears backwards	Eyes open	Tail in motion
PASTURE	1	1	afternoon	2018_07_24	3	13:18:28:17	13:18:29:16	Standing		Head up	Ears backwards	Eyes open	Tail hanging
PASTURE	1	1	afternoon	2018_07_24	3	13:18:29:17	13:18:30:16	Standing		Head up	Ears backwards	Eyes open	Tail hanging
PASTURE	1	1	afternoon	2018_07_24	3	13:18:30:17	13:18:31:16	Standing		Head up	Ears backwards	Eyes open	Tail hanging
PASTURE	1	1	afternoon	2018_07_24	3	13:18:31:17	13:18:32:16	Standing		Head up	Ears backwards	Eyes open	Tail hanging
PASTURE	1	1	afternoon	2018_07_24	3	13:18:32:17	13:18:33:16	Standing		Head up	Ears backwards	Eyes open	Tail hanging
PASTURE	1	1	afternoon	2018_07_24	3	13:18:33:17	13:18:34:16	Standing		Head up	Ears backwards	Eyes open	Tail hanging
PASTURE	1	1	afternoon	2018_07_24	3	13:18:34:17	13:18:35:16	Standing		Head up	Ears backwards	Eyes open	Tail hanging
PASTURE	1	1	afternoon	2018_07_24	3	13:18:35:17	13:18:36:16	Standing		Head up	Ears backwards	Eyes open	Tail hanging
PASTURE	1	1	afternoon	2018_07_24	3	13:18:36:17	13:18:37:16	Standing		Head up	Ears backwards	Eyes open	Tail hanging
PASTURE	1	1	afternoon	2018_07_24	3	13:18:37:17	13:18:38:16	Standing		Head up	Ears backwards	Eyes open	Tail hanging
PASTURE	1	1	afternoon	2018_07_24	3	13:18:38:17	13:18:39:16	Standing		Head up	Ears backwards	Eyes open	Tail in motion
PASTURE	1	1	afternoon	2018_07_24	3	13:18:39:17	13:18:40:16	Standing		Head up	Ears backwards	Eyes open	Tail in motion
PASTURE	1	1	afternoon	2018_07_24	3	13:18:40:17	13:18:41:16	Standing		Head up	Ears backwards	Eyes open	Tail in motion
PASTURE	1	1	afternoon	2018_07_24	3	13:18:41:17	13:18:42:16	Standing		Head up	Ears backwards	Eyes open	Tail in motion
PASTURE	1	1	afternoon	2018_07_24	3	13:18:42:17	13:18:43:16	Standing		Head up	Ears backwards	Eyes open	Tail in motion
PASTURE	1	1	afternoon	2018_07_24	3	13:18:43:17	13:18:44:16	Standing		Head up	Ears backwards	Eyes open	Tail in motion
PASTURE	1	1	afternoon	2018_07_24	3	13:18:44:17	13:18:45:16	Standing		Head up	Ears backwards	Eyes open	Tail in motion
PASTURE	1	1	afternoon	2018_07_24	3	13:18:45:17	13:18:46:16	Standing		Head up	Ears backwards	Eyes open	Tail in motion
PASTURE	1	1	afternoon	2018_07_24	3	13:18:46:17	13:18:47:16	Standing		Head up	Ears backwards	Eyes open	Tail in motion
PASTURE	1	1	afternoon	2018_07_24	3	13:18:47:17	13:18:48:16	Standing		Head up	Ears backwards	Eyes open	Tail in motion
PASTURE	1	1	afternoon	2018_07_24	3	13:18:48:17	13:18:49:16	Standing		Head up	Ears backwards	Eyes open	Tail in motion
PASTURE	1	1	afternoon	2018_07_24	3	13:18:49:17	13:18:50:16	Standing		Head up	Ears backwards	Eyes open	Tail in motion
PASTURE	1	1	afternoon	2018_07_24	3	13:18:50:17	13:18:51:16	Standing		Head up	Ears backwards	Eyes open	Tail in motion
PASTURE	1	1	afternoon	2018_07_24	3	13:18:51:17	13:18:52:16	Standing		Head up	Ears forwards	Eyes open	Tail in motion
PASTURE	1	1	afternoon	2018_07_24	3	13:18:52:17	13:18:53:16	Standing		Head up	Ears forwards	Eyes open	Tail in motion
PASTURE	1	1	afternoon	2018_07_24	3	13:18:53:17	13:18:54:16	Standing		Head up	Ears forwards	Eyes open	Tail in motion
PASTURE	1	1	afternoon	2018_07_24	3	13:18:54:17	13:18:55:16	Standing		Head up	Ears forwards	Eyes open	Tail in motion
PASTURE	1	1	afternoon	2018_07_24	3	13:18:55:17	13:18:56:16	Standing		Head up	Ears forwards	Eyes open	Tail in motion
PASTURE	1	1	afternoon	2018_07_24	3	13:18:56:17	13:18:57:16	Standing		Head up	Ears forwards	Eyes open	Tail in motion
PASTURE	1	1	afternoon	2018_07_24	3	13:18:57:17	13:18:58:16	Standing		Head up	Ears forwards	Eyes open	Tail in motion
PASTURE	1	1	afternoon	2018_07_24	3	13:18:58:17	13:18:59:16	Standing		Head up	Ears forwards	Eyes open	Tail in motion
PASTURE	1	1	afternoon	2018_07_24	3	13:18:59:17	13:19:00:16	Standing		Head up	Ears forwards	Eyes open	Tail in motion
PASTURE	1	1	afternoon	2018_07_24	3	13:19:00:17	13:19:01:16	Standing		Head up	Ears forwards	Eyes open	Tail in motion
PASTURE	1	1	afternoon	2018_07_24	3	13:19:01:17	13:19:02:16	Standing		Head up	Ears forwards	Eyes open	Tail in motion
PASTURE	1	1	afternoon	2018_07_24	3	13:19:02:17	13:19:03:16	Standing		Head up	Ears forwards	Eyes open	Tail in motion
PASTURE	1	1	afternoon	2018_07_24	3	13:19:03:17	13:19:04:16	Standing		Head up	Ears forwards	Eyes open	Tail in motion
PASTURE	1	1	afternoon	2018_07_24	3	13:19:04:17	13:19:05:16	Standing		Head up	Ears forwards	Eyes open	Tail in motion
PASTURE	1	1	afternoon	2018_07_24	3	13:19:05:17	13:19:06:16	Standing		Head up	Ears forwards	Eyes open	Tail in motion
PASTURE	1	1	afternoon	2018_07_24	3	13:19:06:17	13:19:07:16	Standing		Head up	Ears forwards	Eyes open	Tail in motion
PASTURE	1	1	afternoon	2018_07_24	3	13:19:07:17	13:19:08:16	Standing		Head up	Ears forwards	Eyes open	Tail in motion
PASTURE	1	1	afternoon	2018_07_24	3	13:19:08:17	13:19:09:16	Standing		Head up	Ears forwards	Eyes open	Tail in motion
PASTURE	1	1	afternoon	2018_07_24	3	13:19:09:17	13:19:10:16	Standing		Head up	Ears forwards	Eyes open	Tail in motion
PASTURE	1	1	afternoon	2018_07_24	3	13:19:10:17	13:19:11:16	Standing		Head up	Ears forwards	Eyes open	Tail in motion
PASTURE	1	1	afternoon	2018_07_24	3	13:19:11:17	13:19:12:16	Standing		Head up	Ears forwards	Eyes open	Tail in motion
PASTURE	1	1	afternoon	2018_07_24	3	13:19:12:17	13:19:13:16	Standing		Head up	Ears forwards	Eyes open	Tail in motion
PASTURE	1	1	afternoon	2018_07_24	3	13:19:13:17	13:19:14:16	Standing		Head up	Ears forwards	Eyes open	Tail in motion
PASTURE	1	1	afternoon	2018_07_24	3	13:19:14:17	13:19:15:16	Standing		Head up	Ears forwards	Eyes open	Tail in motion
PASTURE	1	1	afternoon	2018_07_24	3	13:19:15:17	13:19:16:16	Standing		Head up	Ears forwards	Eyes open	Tail in motion
PASTURE	1	1	afternoon	2018_07_24	3	13:19:16:17	13:19:17:16	Standing		Head up	Ears forwards	Eyes open	Tail in motion
PASTURE	1	1	afternoon	2018_07_24	3	13:19:17:17	13:19:18:16	Standing		Head up	Ears forwards	Eyes open	Tail in motion
PASTURE	1	1	afternoon	2018_07_24	3	13:21:12:17	13:21:13:16	Standing		Head up	Ears backwards	Eyes open	Tail hanging
PASTURE	1	1	afternoon	2018_07_24	3	13:21:13:17	13:21:14:16	Standing		Head up	Ears backwards	Eyes open	Tail hanging
PASTURE	1	1	afternoon	2018_07_24	3	13:21:14:17	13:21:15:16	Standing		Head up	Ears backwards	Eyes open	Tail hanging
PASTURE	1	1	afternoon	2018_07_24	3	13:21:15:17	13:21:16:16	Standing		Head up	Ears backwards	Eyes open	Tail hanging
PASTURE	1	1	afternoon	2018_07_24	3	13:21:16:17	13:21:17:16	Standing		Head up	Ears backwards	Eyes open	Tail hanging
PASTURE	1	1	afternoon	2018_07_24	3	13:21:17:17	13:21:18:16	Standing		Head up	Ears backwards	Eyes open	Tail hanging
PASTURE	1	1	afternoon	2018_07_24	3	13:21:18:17	13:21:19:16	Standing		Head up	Ears backwards	Eyes open	Tail hanging
PASTURE	1	1	afternoon	2018_07_24	3	13:21:19:17	13:21:20:16	Standing		Head up	Ears backwards	Eyes open	Tail hanging
PASTURE	1	1	afternoon	2018_07_24	3	13:21:20:17	13:21:21:16	Standing		Head up	Ears backwards	Eyes open	Tail hanging
PASTURE	1	1	afternoon	2018_07_24	3	13:21:21:17	13:21:22:16	Standing		Head up	Ears backwards	Eyes open	Tail in motion
PASTURE	1	1	afternoon	2018_07_24	3	13:21:22:17	13:21:23:16	Standing		Head up	Ears backwards	Eyes open	Tail in motion
PASTURE	1	1	afternoon	2018_07_24	3	13:21:23:17	13:21:24:16	Standing		Head up	Ears backwards	Eyes open	Tail in motion
PASTURE	1	1	afternoon	2018_07_24	3	13:21:24:17	13:21:25:16	Standing		Head up	Ears backwards	Eyes open	Tail in motion
PASTURE	1	1	afternoon	2018_07_24	3	13:21:25:17	13:21:26:16	Standing		Head up	Ears backwards	Eyes open	Tail in motion
PASTURE	1	1	afternoon	2018_07_24	3	13:21:26:17	13:21:27:16	Standing		Head up	Ears backwards	Eyes open	Tail in motion
PASTURE	1	1	afternoon	2018_07_24	3	13:21:27:17	13:21:28:16	Standing		Head up	Ears backwards	Eyes open	Tail in motion
PASTURE	1	1	afternoon	2018_07_24	3	13:21:28:17	13:21:29:16	Standing		Head up	Ears backwards	Eyes open	Tail in motion
PASTURE	1	1	afternoon	2018_07_24	3	13:21:29:17	13:21:30:16	Standing		Head up	Ears backwards	Eyes open	Tail in motion
PASTURE	1	1	afternoon	2018_07_24	3	13:21:30:17	13:21:31:16	Standing		Head up	Ears backwards	Eyes open	Tail in motion
PASTURE	1	1	afternoon	2018_07_24	3	13:21:31:17	13:21:32:16	Standing		Head up	Ears backwards	Eyes open	Tail in motion
PASTURE	1	1	afternoon	2018_07_24	3	13:21:32:17	13:21:33:16	Standing		Head up	Ears backwards	Eyes open	Tail in motion
PASTURE	1	1	afternoon	2018_07_24	3	13:21:33:17	13:21:34:16	Standing		Head up	Ears backwards	Eyes open	Tail in motion
PASTURE	1	1	afternoon	2018_07_24	3	13:21:34:17	13:21:35:16	Standing		Head up	Ears backwards	Eyes open	Tail in motion
PASTURE	1	1	afternoon	2018_07_24	3	13:21:35:17	13:21:36:16	Standing		Head up	Ears backwards	Eyes open	Tail in motion
PASTURE	1	1	afternoon	2018_07_24	3	13:21:36:17	13:21:37:16	Standing		Head up	Ears backwards	Eyes open	Tail in motion
PASTURE	1	1	afternoon	2018_07_24	3	13:21:37:17	13:21:38:16	Standing		Head up	Ears backwards	Eyes open	Tail in motion
PASTURE	1	1	afternoon	2018_07_24	3	13:21:38:17	13:21:39:16	Standing		Head up	Ears backwards	Eyes open	Tail in motion
PASTURE	1	1	afternoon	2018_07_24	3	13:21:39:17	13:21:40:16	Standing		Head up	Ears backwards	Eyes open	Tail in motion
PASTURE	1	1	afternoon	2018_07_24	3	13:21:40:17	13:21:41:16	Standing		Head up	Ears backwards	Eyes open	Tail in motion
PASTURE	1	1	afternoon	2018_07_24	3	13:21:41:17	13:21:42:16	Standing		Head up	Ears backwards	Eyes open	Tail in motion
PASTURE	1	1	afternoon	2018_07_24	3	13:21:42:17	13:21:43:16	Standing		Head up	Ears backwards	Eyes open	Tail in motion
PASTURE	1	1	afternoon	2018_07_24	3	13:21:43:17	13:21:44:16	Standing		Head up	Ears backwards	Eyes open	Tail in motion
PASTURE	1	1	afternoon	2018_07_24	3	13:21:44:17	13:21:45:16	Standing		Head up	Ears backwards	Eyes open	Tail in motion
PASTURE	1	1	afternoon	2018_07_24	3	13:21:45:17	13:21:46:16	Standing		Head up	Ears backwards	Eyes open	Tail in motion
PASTURE	1	1	afternoon	2018_07_24	3	13:21:46:17	13:21:47:16	Standing		Head up	Ears backwards	Eyes open	Tail in motion
PASTURE	1	1	afternoon	2018_07_24	3	13:21:47:17	13:21:48:16	Standing		Head up	Ears backwards	Eyes open	Tail in motion
PASTURE	1	1	afternoon	2018_07_24	3	13:21:48:17	13:21:49:16	Standing		Head up	Ears backwards	Eyes open	Tail in motion
PASTURE	1	1	afternoon	2018_07_24	3	13:21:49:17	13:21:50:16	Standing		Head up	Ears backwards	Eyes open	Tail in motion
PASTURE	1	1	afternoon	2018_07_24	3	13:21:50:17	13:21:51:16	Standing		Head up	Ears backwards	Eyes open	Tail in motion
PASTURE	1	1	afternoon	2018_07_24	3	13:21:51:17	13:21:52:16	Standing		Head up	Ears backwards	Eyes open	Tail in motion
PASTURE	1	1	afternoon	2018_07_24	3	13:21:52:17	13:21:53:16	Standing		Head up	Ears backwards	Eyes open	Tail in motion
PASTURE	1	1	afternoon	2018_07_24	3	13:21:53:17	13:21:54:16	Standing		Head up	Ears backwards	Eyes open	Tail in motion
PASTURE	1	1	afternoon	2018_07_24	3	13:21:54:17	13:21:55:16	Standing		Head up	Ears backwards	Eyes open	Tail in motion
PASTURE	1	1	afternoon	2018_07_24	3	13:21:55:17	13:21:56:16	Standing		Head up	Ears backwards	Eyes open	Tail in motion
PASTURE	1	1	afternoon	2018_07_24	3	13:21:56:17	13:21:57:16	Standing		Head up	Ears backwards	Eyes open	Tail in motion
PASTURE	1	1	afternoon	2018_07_24	3	13:21:57:17	13:21:58:16	Standing		Head up	Ears backwards	Eyes open	Tail in motion
PASTURE	1	1	afternoon	2018_07_24	3	13:21:58:17	13:21:59:16	Standing		Head up	Ears backwards	Eyes open	Tail in motion
PASTURE	1	1	afternoon	2018_07_24	3	13:21:59:17	13:22:00:16	Standing		Head up	Ears backwards	Eyes open	Tail in motion
PASTURE	1	1	afternoon	2018_07_24	3	13:22:00:17	13:22:01:16	Standing		Head up	Ears backwards	Eyes open	Tail in motion
PASTURE	1	1	afternoon	2018_07_24	3	13:22:01:17	13:22:02:16	Standing		Head up	Ears backwards	Eyes open	Tail in motion
PASTURE	1	1	afternoon	2018_07_24	3	13:22:02:17	13:22:03:16	Standing		Head up	Ears backwards	Eyes open	Tail in motion
PASTURE	1	1	afternoon	2018_07_24	3	13:22:03:17	13:22:04:16	Standing		Head up	Ears backwards	Eyes open	Tail in motion
PASTURE	1	1	afternoon	2018_07_24	3	13:22:04:17	13:22:05:16	Standing		Head up	Ears backwards	Eyes open	Tail in motion
PASTURE	1	1	afternoon	2018_07_24	3	13:22:05:17	13:22:06:16	Standing		Head up	Ears backwards	Eyes open	Tail in motion
PASTURE	1	1	afternoon	2018_07_24	3	13:22:06:17	13:22:07:16	Standing		Head up	Ears backwards	Eyes open	Tail in motion
PASTURE	1	1	afternoon	2018_07_24	3	13:22:07:17	13:22:08:16	Standing		Head up	Ears backwards	Eyes open	Tail in motion
PASTURE	1	1	afternoon	2018_07_24	3	13:22:08:17	13:22:09:16	Standing		Head up	Ears backwards	Eyes open	Tail in motion
PASTURE	1	1	afternoon	2018_07_24	3	13:22:09:17	13:22:10:16	Standing		Head up	Ears backwards	Eyes open	Tail in motion
PASTURE	1	1	afternoon	2018_07_24	3	13:22:10:17	13:22:11:16	Standing		Head up	Ears backwards	Eyes open	Tail in motion
PASTURE	1	1	afternoon	2018_07_24	3	13:22:11:17	13:22:12:16	Standing		Head up	Ears backwards	Eyes open	Tail in motion
PASTURE	1	1	afternoon	2018_07_24	3	13:22:12:17	13:22:13:16	Standing		Head up	Ears backwards	Eyes open	Tail in motion
PASTURE	1	1	afternoon	2018_07_24	3	13:22:13:17	13:22:14:16	Standing		Head up	Ears backwards	Eyes open	Tail in motion
PASTURE	1	1	afternoon	2018_07_24	3	13:22:14:17	13:22:15:16	Standing		Head up	Ears backwards	Eyes open	Tail in motion
PASTURE	1	1	afternoon	2018_07_24	3	13:22:15:17	13:22:16:16	Standing		Head up	Ears backwards	Eyes open	Tail in motion
PASTURE	1	1	afternoon	2018_07_24	3	13:22:16:17	13:22:17:16	Standing		Head up	Ears backwards	Eyes open	Tail in motion
PASTURE	1	1	afternoon	2018_07_24	3	13:22:17:17	13:22:18:16	Standing		Head up	Ears backwards	Eyes open	Tail in motion
PASTURE	1	1	afternoon	2018_07_24	3	13:22:18:17	13:22:19:16	Standing		Head up	Ears backwards	Eyes open	Tail in motion
PASTURE	1	1	afternoon	2018_07_24	3	13:22:19:17	13:22:20:16	Standing		Head up	Ears backwards	Eyes open	Tail in motion
PASTURE	1	1	afternoon	2018_07_24	3	13:22:20:17	13:22:21:16	Standing		Head up	Ears backwards	Eyes open	Tail in motion
PASTURE	1	1	afternoon	2018_07_24	3	13:22:21:17	13:22:22:16	Standing		Head up	Ears backwards	Eyes open	Tail in motion
PASTURE	1	1	afternoon	2018_07_24	3	13:22:22:17	13:22:23:16	Standing		Head up	Ears backwards	Eyes open	Tail in motion
PASTURE	1	1	afternoon	2018_07_24	3	13:22:23:17	13:22:24:16	Standing		Head up	Ears backwards	Eyes open	Tail in motion
PASTURE	1	1	afternoon	2018_07_24	3	13:22:24:17	13:22:25:16	Standing		Head up	Ears backwards	Eyes open	Tail in motion
PASTURE	1	1	afternoon	2018_07_24	3	13:22:25:17	13:22:26:16	Standing		Head up	Ears backwards	Eyes open	Tail in motion
PASTURE	1	1	afternoon	2018_07_24	3	13:22:26:17	13:22:27:16	Standing		Head up	Ears backwards	Eyes open	Tail in motion
PASTURE	1	1	afternoon	2018_07_24	3	13:22:27:17	13:22:28:16	Standing		Head up	Ears backwards	Eyes open	Tail in motion
PASTURE	1	1	afternoon	2018_07_24	3	13:22:28:17	13:22:29:16	Standing		Head up	Ears backwards	Eyes open	Tail in motion
PASTURE	1	1	afternoon	2018_07_24	3	13:22:29:17	13:22:30:16	Standing		Head up	Ears backwards	Eyes open	Tail in motion
PASTURE	1	1	afternoon	2018_07_24	3	13:22:30:17	13:22:31:16	Standing		Head up	Ears backwards	Eyes open	Tail in motion
PASTURE	1	1	afternoon	2018_07_24	3	13:22:31:17	13:22:32:16	Standing		Head up	Ears backwards	Eyes open	Tail in motion
PASTURE	1	1	afternoon	2018_07_24	3	13:22:32:17	13:22:33:16	Standing		Head up	Ears backwards	Eyes open	Tail in motion
PASTURE	1	1	afternoon	2018_07_24	3	13:22:33:17	13:22:34:16	Standing		Head up	Ears backwards	Eyes open	Tail in motion
PASTURE	1	1	afternoon	2018_07_24	3	13:22:34:17	13:22:35:16	Standing		Head up	Ears backwards	Eyes open	Tail in motion
PASTURE	1	1	afternoon	2018_07_24	3	13:22:35:17	13:22:36:16	Standing		Head up	Ears backwards	Eyes open	Tail in motion
PASTURE	1	1	afternoon	2018_07_24	3	13:22:36:17	13:22:37:16	Standing		Head up	Ears backwards	Eyes open	Tail in motion
PASTURE	1	1	afternoon	2018_07_24	3	13:22:37:17	13:22:38:16	Standing		Head up	Ears backwards	Eyes open	Tail in motion
PASTURE	1	1	afternoon	2018_07_24	3	13:22:38:17	13:22:39:16	Standing		Head up	Ears backwards	Eyes open	Tail in motion
PASTURE	1	1	afternoon	2018_07_24	3	13:22:39:17	13:22:40:16	Standing		Head up	Ears backwards	Eyes open	Tail in motion
PASTURE	1	1	afternoon	2018_07_24	3	13:22:40:17	13:22:41:16	Standing		Head up	Ears backwards	Eyes open	Tail in motion
PASTURE	1	1	afternoon	2018_07_24	3	13:22:41:17	13:22:42:16	Standing		Head up	Ears backwards	Eyes open	Tail in motion
PASTURE	1	1	afternoon	2018_07_24	3	13:22:42:17	13:22:43:16	Standing		Head up	Ears backwards	Eyes open	Tail in motion
PASTURE	1	1	afternoon	2018_07_24	3	13:22:43:17	13:22:44:16	Standing		Head up	Ears backwards	Eyes open	Tail in motion
PASTURE	1	1	afternoon	2018_07_24	3	13:22:44:17	13:22:45:16	Standing		Head up	Ears backwards	Eyes open	Tail in motion
PASTURE	1	1	afternoon	2018_07_24	3	13:22:45:17	13:22:46:16	Standing		Head up	Ears backwards	Eyes open	Tail in motion
PASTURE	1	1	afternoon	2018_07_24	3	13:22:46:17	13:22:47:16	Standing		Head up	Ears backwards	Eyes open	Tail in motion
PASTURE	1	1	afternoon	2018_07_24	3	13:22:47:17	13:22:48:16	Standing		Head up	Ears backwards	Eyes open	Tail in motion
PASTURE	1	1	afternoon	2018_07_24	3	13:22:48:17	13:22:49:16	Standing		Head up	Ears backwards	Eyes open	Tail in motion
PASTURE	1	1	afternoon	2018_07_24	3	13:22:49:17	13:22:50:16	Standing		Head up	Ears backwards	Eyes open	Tail in motion
PASTURE	1	1	afternoon	2018_07_24	3	13:22:50:17	13:22:51:16	Standing		Head up	Ears backwards	Eyes open	Tail in motion
PASTURE	1	1	afternoon	2018_07_24	3	13:22:51:17	13:22:52:16	Standing		Head up	Ears backwards	Eyes open	Tail in motion
PASTURE	1	1	afternoon	2018_07_24	3	13:22:52:17	13:22:53:16	Standing		Head up	Ears backwards	Eyes open	Tail in motion
PASTURE	1	1	afternoon	2018_07_24	3	13:22:53:17	13:22:54:16	Standing		Head up	Ears backwards	Eyes open	Tail in motion
PASTURE	1	1	afternoon	2018_07_24	3	13:22:54:17	13:22:55:16	Standing		Head up	Ears backwards	Eyes open	Tail in motion
PASTURE	1	1	afternoon	2018_07_24	3	13:22:55:17	13:22:56:16	Standing		Head up	Ears backwards	Eyes open	Tail in motion
PASTURE	1	1	afternoon	2018_07_24	3	13:22:56:17	13:22:57:16	Standing		Head up	Ears backwards	Eyes open	Tail in motion
PASTURE	1	1	afternoon	2018_07_24	3	13:22:57:17	13:22:58:16	Standing		Head up	Ears backwards	Eyes open	Tail in motion
PASTURE	1	1	afternoon	2018_07_24	3	13:22:58:17	13:22:59:16	Standing		Head up	Ears backwards	Eyes open	Tail in motion
PASTURE	1	1	afternoon	2018_07_24	3	13:22:59:17	13:23:00:16	Standing		Head up	Ears backwards	Eyes open	Tail in motion
PASTURE	1	1	afternoon	2018_07_24	3	13:23:00:17	13:23:01:16	Standing		Head up	Ears backwards	Eyes open	Tail in motion
PASTURE	1	1	afternoon	2018_07_24	3	13:23:01:17	13:23:02:16	Standing		Head up	Ears backwards	Eyes open	Tail in motion
PASTURE	1	1	afternoon	2018_07_24	3	13:23:02:17	13:23:03:16	Standing		Head up	Ears backwards	Eyes open	Tail in motion
PASTURE	1	1	afternoon	2018_07_24	3	13:23:03:17	13:23:04:16	Standing		Head up	Ears backwards	Eyes open	Tail in motion
PASTURE	1	1	afternoon	2018_07_24	3	13:23:04:17	13:23:05:16	Standing		Head up	Ears backwards	Eyes open	Tail in motion
PASTURE	1	1	afternoon	2018_07_24	3	13:23:05:17	13:23:06:16	Standing		Head up	Ears backwards	Eyes open	Tail in motion
PASTURE	1	1	afternoon	2018_07_24	3	13:23:06:17	13:23:07:16	Standing		Head up	Ears forwards	Eyes open	Tail in motion
PASTURE	1	1	afternoon	2018_07_24	3	13:23:07:17	13:23:08:16	Standing		Head up	Ears forwards	Eyes open	Tail in motion
PASTURE	1	1	afternoon	2018_07_24	3	13:23:08:17	13:23:09:16	Standing		Head up	Ears forwards	Eyes open	Tail in motion
PASTURE	1	1	afternoon	2018_07_24	3	13:23:09:17	13:23:10:16	Standing		Head up	Ears forwards	Eyes open	Tail in motion
PASTURE	1	1	afternoon	2018_07_24	3	13:23:10:17	13:23:11:16	Standing		Head up	Ears forwards	Eyes open	Tail in motion
PASTURE	1	1	afternoon	2018_07_24	3	13:23:11:17	13:23:12:16	Standing		Head up	Ears forwards	Eyes open	Tail in motion
PASTURE	1	1	afternoon	2018_07_24	3	13:23:12:17	13:23:13:16	Standing		Head up	Ears forwards	Eyes open	Tail in motion
PASTURE	1	1	afternoon	2018_07_24	3	13:23:13:17	13:23:14:16	Standing		Head up	Ears forwards	Eyes open	Tail in motion
PASTURE	1	1	afternoon	2018_07_24	3	13:23:14:17	13:23:15:16	Standing		Head up	Ears forwards	Eyes open	Tail in motion
PASTURE	1	1	afternoon	2018_07_24	3	13:23:15:17	13:23:16:16	Standing		Head up	Ears forwards	Eyes open	Tail in motion
PASTURE	1	1	afternoon	2018_07_24	3	13:23:16:17	13:23:17:16	Standing		Head up	Ears forwards	Eyes open	Tail in motion
PASTURE	1	1	afternoon	2018_07_24	3	13:23:17:17	13:23:18:16	Standing		Head up	Ears forwards	Eyes open	Tail in motion
PASTURE	1	1	afternoon	2018_07_24	3	13:23:18:17	13:23:19:16	Standing		Head up	Ears forwards	Eyes open	Tail in motion
PASTURE	1	1	afternoon	2018_07_24	3	13:23:19:17	13:23:20:16	Standing		Head up	Ears forwards	Eyes open	Tail in motion
PASTURE	1	1	afternoon	2018_07_24	3	13:23:20:17	13:23:21:16	Standing		Head up	Ears forwards	Eyes open	Tail in motion
PASTURE	1	1	afternoon	2018_07_24	3	13:23:21:17	13:23:22:16	Standing		Head up	Ears forwards	Eyes open	Tail in motion
PASTURE	1	1	afternoon	2018_07_24	3	13:23:22:17	13:23:23:16	Standing		Head up	Ears forwards	Eyes open	Tail in motion
PASTURE	1	1	afternoon	2018_07_24	3	13:23:23:17	13:23:24:16	Standing		Head up	Ears forwards	Eyes open	Tail in motion
PASTURE	1	1	afternoon	2018_07_24	3	13:23:24:17	13:23:25:16	Standing		Head up	Ears forwards	Eyes open	Tail in motion
PASTURE	1	1	afternoon	2018_07_24	3	13:23:25:17	13:23:26:16	Standing		Head up	Ears forwards	Eyes open	Tail in motion
PASTURE	1	1	afternoon	2018_07_24	3	13:23:26:17	13:23:27:16	Standing		Head up	Ears forwards	Eyes open	Tail in motion
PASTURE	1	1	afternoon	2018_07_24	3	13:23:27:17	13:23:28:16	Standing		Head up	Ears forwards	Eyes open	Tail in motion
PASTURE	1	1	afternoon	2018_07_24	3	13:23:28:17	13:23:29:16	Standing		Head up	Ears forwards	Eyes open	Tail in motion
PASTURE	1	1	afternoon	2018_07_24	3	13:23:29:17	13:23:30:16	Standing		Head up	Ears forwards	Eyes open	Tail in motion
PASTURE	1	1	afternoon	2018_07_24	3	13:23:30:17	13:23:31:16	Standing		Head up	Ears forwards	Eyes open	Tail in motion
PASTURE	1	1	afternoon	2018_07_24	3	13:23:31:17	13:23:32:16	Standing		Head up	Ears forwards	Eyes open	Tail in motion
PASTURE	1	1	afternoon	2018_07_24	3	13:23:32:17	13:23:33:16	Standing		Head up	Ears forwards	Eyes open	Tail in motion
PASTURE	1	1	afternoon	2018_07_24	3	13:23:33:17	13:23:34:16	Standing		Head up	Ears forwards	Eyes open	Tail in motion
PASTURE	1	1	afternoon	2018_07_24	3	13:23:34:17	13:23:35:16	Standing		Head up	Ears forwards	Eyes open	Tail in motion
PASTURE	1	1	afternoon	2018_07_24	3	13:23:35:17	13:23:36:16	Standing		Head up	Ears forwards	Eyes open	Tail in motion
PASTURE	1	1	afternoon	2018_07_24	3	13:23:36:17	13:23:37:16	Standing		Head up	Ears forwards	Eyes open	Tail in motion
PASTURE	1	1	afternoon	2018_07_24	3	13:23:37:17	13:23:38:16	Standing		Head up	Ears forwards	Eyes open	Tail in motion
PASTURE	1	1	afternoon	2018_07_24	3	13:23:38:17	13:23:39:16	Standing		Head up	Ears forwards	Eyes open	Tail in motion
PASTURE	1	1	afternoon	2018_07_24	3	13:23:39:17	13:23:40:16	Standing		Head up	Ears forwards	Eyes open	Tail in motion
PASTURE	1	1	afternoon	2018_07_24	3	13:23:40:17	13:23:41:16	Standing		Head up	Ears forwards	Eyes open	Tail in motion
PASTURE	1	1	afternoon	2018_07_24	3	13:23:41:17	13:23:42:16	Standing		Head up	Ears forwards	Eyes open	Tail in motion
PASTURE	1	1	afternoon	2018_07_24	3	13:23:42:17	13:23:43:16	Standing		Head up	Ears forwards	Eyes open	Tail in motion
PASTURE	1	1	afternoon	2018_07_24	3	13:23:43:17	13:23:44:16	Standing		Head up	Ears forwards	Eyes open	Tail in motion
PASTURE	1	1	afternoon	2018_07_24	3	13:23:44:17	13:23:45:16	Standing		Head up	Ears forwards	Eyes open	Tail in motion
PASTURE	1	1	afternoon	2018_07_24	3	13:23:45:17	13:23:46:16	Standing		Head up	Ears forwards	Eyes open	Tail in motion
PASTURE	1	1	afternoon	2018_07_24	3	13:23:46:17	13:23:47:16	Standing		Head up	Ears backwards	Eyes open	Tail in motion
PASTURE	1	1	afternoon	2018_07_24	3	13:23:47:17	13:23:48:16	Standing		Head up	Ears backwards	Eyes open	Tail in motion
PASTURE	1	1	afternoon	2018_07_24	3	13:23:48:17	13:23:49:16	Standing		Head up	Ears backwards	Eyes open	Tail in motion
PASTURE	1	1	afternoon	2018_07_24	3	13:23:49:17	13:23:50:16	Standing		Head up	Ears backwards	Eyes open	Tail in motion
PASTURE	1	1	afternoon	2018_07_24	3	13:23:50:17	13:23:51:16	Standing		Head up	Ears backwards	Eyes open	Tail in motion
PASTURE	1	1	afternoon	2018_07_24	3	13:23:51:17	13:23:52:16	Standing		Head up	Ears backwards	Eyes open	Tail in motion
PASTURE	1	1	afternoon	2018_07_24	3	13:23:52:17	13:23:53:16	Standing		Head up	Ears backwards	Eyes open	Tail in motion
PASTURE	1	1	afternoon	2018_07_24	3	13:23:53:17	13:23:54:16	Standing		Head up	Ears backwards	Eyes open	Tail in motion
PASTURE	1	1	afternoon	2018_07_24	3	13:23:54:17	13:23:55:16	Standing		Head up	Ears backwards	Eyes open	Tail in motion
PASTURE	1	1	afternoon	2018_07_24	3	13:23:55:17	13:23:56:16	Standing		Head up	Ears backwards	Eyes open	Tail in motion
PASTURE	1	1	afternoon	2018_07_24	3	13:23:56:17	13:23:57:16	Standing		Head up	Ears backwards	Eyes open	Tail in motion
PASTURE	1	1	afternoon	2018_07_24	3	13:23:57:17	13:23:58:16	Standing		Head up	Ears forwards	Eyes open	Tail in motion
PASTURE	1	1	afternoon	2018_07_24	3	13:23:58:17	13:23:59:16	Standing		Head up	Ears forwards	Eyes open	Tail in motion
PASTURE	1	1	afternoon	2018_07_24	3	13:23:59:17	13:24:00:16	Standing		Head up	Ears forwards	Eyes open	Tail in motion
PASTURE	1	1	afternoon	2018_07_24	3	13:24:00:17	13:24:01:16	Standing		Head up	Ears forwards	Eyes open	Tail in motion
PASTURE	1	1	afternoon	2018_07_24	3	13:24:01:17	13:24:02:16	Standing		Head up	Ears forwards	Eyes open	Tail in motion
PASTURE	1	1	afternoon	2018_07_24	3	13:24:02:17	13:24:03:16	Standing		Head up	Ears forwards	Eyes open	Tail in motion
PASTURE	1	1	afternoon	2018_07_24	3	13:24:03:17	13:24:04:16	Standing		Head up	Ears forwards	Eyes open	Tail in motion
PASTURE	1	1	afternoon	2018_07_24	3	13:24:04:17	13:24:05:16	Standing		Head up	Ears forwards	Eyes open	Tail in motion
PASTURE	1	1	afternoon	2018_07_24	3	13:24:05:17	13:24:06:16	Standing		Head up	Ears forwards	Eyes open	Tail in motion
PASTURE	1	1	afternoon	2018_07_24	3	13:24:06:17	13:24:07:16	Standing		Head up	Ears forwards	Eyes open	Tail in motion
PASTURE	1	1	afternoon	2018_07_24	3	13:24:07:17	13:24:08:16	Standing		Head up	Ears forwards	Eyes open	Tail in motion
PASTURE	1	1	afternoon	2018_07_24	3	13:24:08:17	13:24:09:16	Standing		Head up	Ears forwards	Eyes open	Tail in motion
PASTURE	1	1	afternoon	2018_07_24	3	13:24:09:17	13:24:10:16	Standing		Head up	Ears forwards	Eyes open	Tail in motion
PASTURE	1	1	afternoon	2018_07_24	3	13:24:10:17	13:24:11:16	Standing		Head up	Ears forwards	Eyes open	Tail in motion
PASTURE	1	1	afternoon	2018_07_24	3	13:24:11:17	13:24:12:16	Standing		Head up	Ears forwards	Eyes open	Tail in motion
PASTURE	1	1	afternoon	2018_07_24	3	13:24:41:17	13:24:42:16	Standing		Head up	Ears forwards	Eyes open	Tail hanging
PASTURE	1	1	afternoon	2018_07_24	3	13:24:42:17	13:24:43:16	Standing		Head up	Ears forwards	Eyes open	Tail hanging
PASTURE	1	1	afternoon	2018_07_24	3	13:24:43:17	13:24:44:16	Standing		Head up	Ears forwards	Eyes open	Tail hanging
PASTURE	1	1	afternoon	2018_07_24	3	13:24:44:17	13:24:45:16	Standing		Head up	Ears forwards	Eyes open	Tail hanging
PASTURE	1	1	afternoon	2018_07_24	3	13:24:45:17	13:24:46:16	Standing		Head up	Ears forwards	Eyes open	Tail hanging
PASTURE	1	1	afternoon	2018_07_24	3	13:24:46:17	13:24:47:16	Standing		Head up	Ears forwards	Eyes open	Tail hanging
PASTURE	1	1	afternoon	2018_07_24	3	13:24:47:17	13:24:48:16	Standing		Head up	Ears forwards	Eyes open	Tail hanging
PASTURE	1	1	afternoon	2018_07_24	3	13:24:48:17	13:24:49:16	Standing		Head up	Ears forwards	Eyes open	Tail hanging
PASTURE	1	1	afternoon	2018_07_24	3	13:24:49:17	13:24:50:16	Standing		Head up	Ears forwards	Eyes open	Tail hanging
PASTURE	1	1	afternoon	2018_07_24	3	13:24:50:17	13:24:51:16	Standing		Head up	Ears forwards	Eyes open	Tail hanging
PASTURE	1	1	afternoon	2018_07_24	3	13:24:51:17	13:24:52:16	Standing		Head up	Ears forwards	Eyes open	Tail hanging
PASTURE	1	1	afternoon	2018_07_24	3	13:24:52:17	13:24:53:16	Standing		Head up	Ears forwards	Eyes open	Tail hanging
PASTURE	1	1	afternoon	2018_07_24	3	13:24:53:17	13:24:54:16	Standing		Head up	Ears forwards	Eyes open	Tail hanging
PASTURE	1	1	afternoon	2018_07_24	3	13:24:54:17	13:24:55:16	Standing		Head up	Ears forwards	Eyes open	Tail hanging
PASTURE	1	1	afternoon	2018_07_24	3	13:24:55:17	13:24:56:16	Standing		Head leaned, standing	Ears forwards	Eyes open	Tail hanging
PASTURE	1	1	afternoon	2018_07_24	3	13:24:56:17	13:24:57:16	Standing		Head leaned, standing	Ears forwards	Eyes open	Tail hanging
PASTURE	1	1	afternoon	2018_07_24	3	13:24:57:17	13:24:58:16	Standing		Head leaned, standing	Ears forwards	Eyes open	Tail hanging
PASTURE	1	1	afternoon	2018_07_24	3	13:24:58:17	13:24:59:16	Standing		Head leaned, standing	Ears forwards	Eyes open	Tail hanging
PASTURE	1	1	afternoon	2018_07_24	3	13:24:59:17	13:25:00:16	Standing		Head leaned, standing	Ears forwards	Eyes open	Tail hanging
PASTURE	1	1	afternoon	2018_07_24	3	13:25:00:17	13:25:01:16	Standing		Head leaned, standing	Ears forwards	Eyes open	Tail hanging
PASTURE	1	1	afternoon	2018_07_24	3	13:25:01:17	13:25:02:16	Standing		Head up	Ears forwards	Eyes open	Tail hanging
PASTURE	1	1	afternoon	2018_07_24	3	13:25:02:17	13:25:03:16	Standing		Head up	Ears forwards	Eyes open	Tail hanging
PASTURE	1	1	afternoon	2018_07_24	3	13:25:03:17	13:25:04:16	Standing		Head up	Ears forwards	Eyes open	Tail hanging
PASTURE	1	1	afternoon	2018_07_24	3	13:25:04:17	13:25:05:16	Standing		Head up	Ears forwards	Eyes open	Tail hanging
PASTURE	1	1	afternoon	2018_07_24	3	13:25:05:17	13:25:06:16	Standing		Head up	Ears forwards	Eyes open	Tail hanging
PASTURE	1	1	afternoon	2018_07_24	3	13:25:06:17	13:25:07:16	Standing		Head up	Ears forwards	Eyes open	Tail hanging
PASTURE	1	1	afternoon	2018_07_24	3	13:25:07:17	13:25:08:16	Standing		Head up	Ears forwards	Eyes open	Tail hanging
PASTURE	1	1	afternoon	2018_07_24	3	13:25:08:17	13:25:09:16	Standing		Head up	Ears forwards	Eyes open	Tail hanging
PASTURE	1	1	afternoon	2018_07_24	3	13:25:09:17	13:25:10:16	Standing		Head up	Ears forwards	Eyes open	Tail hanging
PASTURE	1	1	afternoon	2018_07_24	3	13:25:10:17	13:25:11:16	Standing		Head up	Ears forwards	Eyes open	Tail hanging
PASTURE	1	1	afternoon	2018_07_24	3	13:25:11:17	13:25:12:16	Standing		Head up	Ears forwards	Eyes open	Tail hanging
PASTURE	1	1	afternoon	2018_07_24	3	13:25:12:17	13:25:13:16	Standing		Head up	Ears forwards	Eyes open	Tail hanging
PASTURE	1	1	afternoon	2018_07_24	3	13:25:13:17	13:25:14:16	Standing		Head up	Ears forwards	Eyes open	Tail hanging
PASTURE	1	1	afternoon	2018_07_24	3	13:25:14:17	13:25:15:16	Standing		Head up	Ears forwards	Eyes open	Tail hanging
PASTURE	1	1	afternoon	2018_07_24	3	13:25:15:17	13:25:16:16	Standing		Head up	Ears forwards	Eyes open	Tail hanging
PASTURE	1	1	afternoon	2018_07_24	3	13:25:16:17	13:25:17:16	Standing		Head up	Ears forwards	Eyes open	Tail hanging
PASTURE	1	1	afternoon	2018_07_24	3	13:25:17:17	13:25:18:16	Standing		Head up	Ears forwards	Eyes open	Tail hanging
PASTURE	1	1	afternoon	2018_07_24	3	13:25:18:17	13:25:19:16	Standing		Head up	Ears forwards	Eyes open	Tail hanging
PASTURE	1	1	afternoon	2018_07_24	3	13:25:19:17	13:25:20:16	Standing		Head up	Ears forwards	Eyes open	Tail hanging
PASTURE	1	1	afternoon	2018_07_24	3	13:25:20:17	13:25:21:16	Standing		Head up	Ears forwards	Eyes open	Tail hanging
PASTURE	1	1	afternoon	2018_07_24	3	13:25:21:17	13:25:22:16	Standing		Head up	Ears forwards	Eyes open	Tail hanging
PASTURE	1	1	afternoon	2018_07_24	3	13:25:22:17	13:25:23:16	Standing		Head up	Ears forwards	Eyes open	Tail hanging
PASTURE	1	1	afternoon	2018_07_24	3	13:25:23:17	13:25:24:16	Standing		Head up	Ears forwards	Eyes open	Tail hanging
PASTURE	1	1	afternoon	2018_07_24	3	13:25:24:17	13:25:25:16	Standing		Head up	Ears forwards	Eyes open	Tail hanging
PASTURE	1	1	afternoon	2018_07_24	3	13:25:25:17	13:25:26:16	Standing		Head up	Ears forwards	Eyes open	Tail hanging
PASTURE	1	1	afternoon	2018_07_24	3	13:25:26:17	13:25:27:16	Standing		Head up	Ears forwards	Eyes open	Tail hanging
PASTURE	1	1	afternoon	2018_07_24	3	13:25:27:17	13:25:28:16	Standing		Head up	Ears forwards	Eyes open	Tail hanging
PASTURE	1	1	afternoon	2018_07_24	3	13:25:28:17	13:25:29:16	Standing		Head up	Ears forwards	Eyes open	Tail hanging
PASTURE	1	1	afternoon	2018_07_24	3	13:25:29:17	13:25:30:16	Standing		Head up	Ears forwards	Eyes open	Tail hanging
PASTURE	1	1	afternoon	2018_07_24	3	13:25:30:17	13:25:31:16	Standing		Head up	Ears backwards	Eyes open	Tail hanging
PASTURE	1	1	afternoon	2018_07_24	3	13:25:31:17	13:25:32:16	Standing		Head up	Ears backwards	Eyes open	Tail hanging
PASTURE	1	1	afternoon	2018_07_24	3	13:25:32:17	13:25:33:16	Standing		Head up	Ears backwards	Eyes open	Tail hanging
PASTURE	1	1	afternoon	2018_07_24	3	13:25:33:17	13:25:34:16	Standing		Head up	Ears backwards	Eyes open	Tail hanging
PASTURE	1	1	afternoon	2018_07_24	3	13:25:34:17	13:25:35:16	Standing		Head up	Ears backwards	Eyes open	Tail hanging
PASTURE	1	1	afternoon	2018_07_24	3	13:25:35:17	13:25:36:16	Standing		Head up	Ears backwards	Eyes open	Tail hanging
PASTURE	1	1	afternoon	2018_07_24	3	13:25:36:17	13:25:37:16	Standing		Head up	Ears backwards	Eyes open	Tail hanging
PASTURE	1	1	afternoon	2018_07_24	3	13:25:37:17	13:25:38:16	Standing		Head up	Ears backwards	Eyes open	Tail hanging
PASTURE	1	1	afternoon	2018_07_24	3	13:25:38:17	13:25:39:16	Standing		Head up	Ears backwards	Eyes open	Tail hanging
PASTURE	1	1	afternoon	2018_07_24	3	13:25:39:17	13:25:40:16	Standing		Head up	Ears backwards	Eyes open	Tail hanging
PASTURE	1	1	afternoon	2018_07_24	3	13:25:40:17	13:25:41:16	Standing		Head up	Ears backwards	Eyes open	Tail hanging
PASTURE	1	1	afternoon	2018_07_24	3	13:25:41:17	13:25:42:16	Standing		Head up	Ears backwards	Eyes open	Tail hanging
PASTURE	1	1	afternoon	2018_07_24	3	13:25:42:17	13:25:43:16	Standing		Head up	Ears backwards	Eyes open	Tail in motion
PASTURE	1	1	afternoon	2018_07_24	3	13:25:43:17	13:25:44:16	Standing		Head up	Ears backwards	Eyes open	Tail in motion
PASTURE	1	1	afternoon	2018_07_24	3	13:25:44:17	13:25:45:16	Standing		Head up	Ears backwards	Eyes open	Tail in motion
PASTURE	1	1	afternoon	2018_07_24	3	13:25:45:17	13:25:46:16	Standing		Head up	Ears backwards	Eyes open	Tail in motion
PASTURE	1	1	afternoon	2018_07_24	3	13:25:46:17	13:25:47:16	Standing		Head up	Ears backwards	Eyes open	Tail in motion
PASTURE	1	1	afternoon	2018_07_24	3	13:25:47:17	13:25:48:16	Standing		Head up	Ears backwards	Eyes open	Tail in motion
PASTURE	1	1	afternoon	2018_07_24	3	13:25:48:17	13:25:49:16	Standing		Head up	Ears backwards	Eyes open	Tail in motion
PASTURE	1	1	afternoon	2018_07_24	3	13:25:49:17	13:25:50:16	Standing		Head up	Ears backwards	Eyes open	Tail in motion
PASTURE	1	1	afternoon	2018_07_24	3	13:25:50:17	13:25:51:16	Standing		Head up	Ears backwards	Eyes open	Tail in motion
PASTURE	1	1	afternoon	2018_07_24	3	13:25:51:17	13:25:52:16	Standing		Head up	Ears backwards	Eyes open	Tail in motion
PASTURE	1	1	afternoon	2018_07_24	3	13:25:52:17	13:25:53:16	Standing		Head up	Ears backwards	Eyes open	Tail in motion
PASTURE	1	1	afternoon	2018_07_24	3	13:25:53:17	13:25:54:16	Standing		Head up	Ears backwards	Eyes open	Tail in motion
PASTURE	1	1	afternoon	2018_07_24	3	13:25:54:17	13:25:55:16	Standing		Head up	Ears backwards	Eyes open	Tail in motion
PASTURE	1	1	afternoon	2018_07_24	3	13:25:55:17	13:25:56:16	Standing		Head up	Ears backwards	Eyes open	Tail in motion
PASTURE	1	1	afternoon	2018_07_24	3	13:25:56:17	13:25:57:16	Standing		Head up	Ears backwards	Eyes open	Tail in motion
PASTURE	1	1	afternoon	2018_07_24	3	13:25:57:17	13:25:58:16	Standing		Head up	Ears backwards	Eyes open	Tail in motion
PASTURE	1	1	afternoon	2018_07_24	3	13:25:58:17	13:25:59:16	Standing		Head up	Ears backwards	Eyes open	Tail in motion
PASTURE	1	1	afternoon	2018_07_24	3	13:25:59:17	13:26:00:16	Standing		Head up	Ears backwards	Eyes open	Tail in motion
PASTURE	1	1	afternoon	2018_07_24	3	13:26:00:17	13:26:01:16	Standing		Head up	Ears backwards	Eyes open	Tail in motion
PASTURE	1	1	afternoon	2018_07_24	3	13:26:01:17	13:26:02:16	Standing		Head up	Ears backwards	Eyes open	Tail in motion
PASTURE	1	1	afternoon	2018_07_24	3	13:26:02:17	13:26:03:16	Standing		Head up	Ears backwards	Eyes open	Tail in motion
PASTURE	1	1	afternoon	2018_07_24	3	13:26:03:17	13:26:04:16	Standing		Head up	Ears backwards	Eyes open	Tail in motion
PASTURE	1	1	afternoon	2018_07_24	3	13:26:04:17	13:26:05:16	Standing		Head up	Ears backwards	Eyes open	Tail in motion
PASTURE	1	1	afternoon	2018_07_24	3	13:26:05:17	13:26:06:16	Standing		Head up	Ears backwards	Eyes open	Tail in motion
PASTURE	1	1	afternoon	2018_07_24	3	13:26:06:17	13:26:07:16	Standing		Head up	Ears backwards	Eyes open	Tail in motion
PASTURE	1	1	afternoon	2018_07_24	3	13:26:07:17	13:26:08:16	Standing		Head up	Ears backwards	Eyes open	Tail in motion
PASTURE	1	1	afternoon	2018_07_24	3	13:26:08:17	13:26:09:16	Standing		Head up	Ears backwards	Eyes open	Tail in motion
PASTURE	1	1	afternoon	2018_07_24	3	13:26:09:17	13:26:10:16	Standing		Head up	Ears backwards	Eyes open	Tail in motion
PASTURE	1	1	afternoon	2018_07_24	3	13:26:10:17	13:26:11:16	Standing		Head up	Ears backwards	Eyes open	Tail in motion
PASTURE	1	1	afternoon	2018_07_24	3	13:26:11:17	13:26:12:16	Standing		Head up	Ears backwards	Eyes open	Tail in motion
PASTURE	1	1	afternoon	2018_07_24	3	13:26:12:17	13:26:13:16	Standing		Head up	Ears backwards	Eyes open	Tail in motion
PASTURE	1	1	afternoon	2018_07_24	3	13:26:13:17	13:26:14:16	Standing		Head up	Ears backwards	Eyes open	Tail in motion
PASTURE	1	1	afternoon	2018_07_24	3	13:26:14:17	13:26:15:16	Standing		Head up	Ears backwards	Eyes open	Tail in motion
PASTURE	1	1	afternoon	2018_07_24	3	13:26:15:17	13:26:16:16	Standing		Head up	Ears backwards	Eyes open	Tail in motion
PASTURE	1	1	afternoon	2018_07_24	3	13:26:16:17	13:26:17:16	Standing		Head up	Ears backwards	Eyes open	Tail in motion
PASTURE	1	1	afternoon	2018_07_24	3	13:26:17:17	13:26:18:16	Standing		Head up	Ears backwards	Eyes open	Tail in motion
PASTURE	1	1	afternoon	2018_07_24	3	13:26:18:17	13:26:19:16	Standing		Head up	Ears backwards	Eyes open	Tail in motion
PASTURE	1	1	afternoon	2018_07_24	3	13:26:19:17	13:26:20:16	Standing		Head up	Ears backwards	Eyes open	Tail in motion
PASTURE	1	1	afternoon	2018_07_24	3	13:26:20:17	13:26:21:16	Standing		Head up	Ears backwards	Eyes open	Tail in motion
PASTURE	1	1	afternoon	2018_07_24	3	13:26:21:17	13:26:22:16	Standing		Head up	Ears backwards	Eyes open	Tail in motion
PASTURE	1	1	afternoon	2018_07_24	3	13:26:22:17	13:26:23:16	Standing		Head up	Ears backwards	Eyes open	Tail in motion
PASTURE	1	1	afternoon	2018_07_24	3	13:26:23:17	13:26:24:16	Standing		Head up	Ears backwards	Eyes open	Tail in motion
PASTURE	1	1	afternoon	2018_07_24	3	13:26:24:17	13:26:25:16	Standing		Head up	Ears backwards	Eyes open	Tail in motion
PASTURE	1	1	afternoon	2018_07_24	3	13:26:25:17	13:26:26:16	Standing		Head up	Ears backwards	Eyes open	Tail in motion
PASTURE	1	1	afternoon	2018_07_24	3	13:26:26:17	13:26:27:16	Standing		Head up	Ears backwards	Eyes open	Tail in motion
PASTURE	1	1	afternoon	2018_07_24	3	13:26:27:17	13:26:28:16	Standing		Head up	Ears backwards	Eyes open	Tail in motion
PASTURE	1	1	afternoon	2018_07_24	3	13:26:28:17	13:26:29:16	Standing		Head up	Ears backwards	Eyes open	Tail in motion
PASTURE	1	1	afternoon	2018_07_24	3	13:26:29:17	13:26:30:16	Standing		Head up	Ears backwards	Eyes open	Tail in motion
PASTURE	1	1	afternoon	2018_07_24	3	13:26:30:17	13:26:31:16	Standing		Head up	Ears backwards	Eyes open	Tail in motion
PASTURE	1	1	afternoon	2018_07_24	3	13:26:31:17	13:26:32:16	Standing		Head up	Ears backwards	Eyes open	Tail in motion
PASTURE	1	1	afternoon	2018_07_24	3	13:26:32:17	13:26:33:16	Standing		Head up	Ears backwards	Eyes open	Tail in motion
PASTURE	1	1	afternoon	2018_07_24	3	13:26:33:17	13:26:34:16	Standing		Head up	Ears backwards	Eyes open	Tail in motion
PASTURE	1	1	afternoon	2018_07_24	3	13:26:34:17	13:26:35:16	Standing		Head up	Ears backwards	Eyes open	Tail in motion
PASTURE	1	1	afternoon	2018_07_24	3	13:26:35:17	13:26:36:16	Standing		Head up	Ears backwards	Eyes open	Tail in motion
PASTURE	1	1	afternoon	2018_07_24	3	13:26:36:17	13:26:37:16	Standing		Head up	Ears backwards	Eyes open	Tail in motion
PASTURE	1	1	afternoon	2018_07_24	3	13:26:37:17	13:26:38:16	Standing		Head up	Ears backwards	Eyes open	Tail in motion
PASTURE	1	1	afternoon	2018_07_24	3	13:26:38:17	13:26:39:16	Standing		Head up	Ears backwards	Eyes open	Tail in motion
PASTURE	1	1	afternoon	2018_07_24	3	13:26:39:17	13:26:40:16	Standing		Head up	Ears backwards	Eyes open	Tail in motion
PASTURE	1	1	afternoon	2018_07_24	3	13:26:40:17	13:26:41:16	Standing		Head up	Ears backwards	Eyes open	Tail in motion
PASTURE	1	1	afternoon	2018_07_24	3	13:26:41:17	13:26:42:16	Standing		Head up	Ears backwards	Eyes open	Tail in motion
PASTURE	1	1	afternoon	2018_07_24	3	13:26:42:17	13:26:43:16	Standing		Head up	Ears backwards	Eyes open	Tail in motion
PASTURE	1	1	afternoon	2018_07_24	3	13:26:43:17	13:26:44:16	Standing		Head up	Ears backwards	Eyes open	Tail in motion
PASTURE	1	1	afternoon	2018_07_24	3	13:26:44:17	13:26:45:16	Standing		Head up	Ears backwards	Eyes open	Tail in motion
PASTURE	1	1	afternoon	2018_07_24	3	13:26:45:17	13:26:46:16	Standing		Head up	Ears asymmetrical	Eyes open	Tail in motion
PASTURE	1	1	afternoon	2018_07_24	3	13:26:46:17	13:26:47:16	Standing		Head up	Ears asymmetrical	Eyes open	Tail in motion
PASTURE	1	1	afternoon	2018_07_24	3	13:26:47:17	13:26:48:16	Standing		Head up	Ears asymmetrical	Eyes open	Tail in motion
PASTURE	1	1	afternoon	2018_07_24	3	13:26:48:17	13:26:49:16	Standing		Head up	Ears asymmetrical	Eyes open	Tail in motion
PASTURE	1	1	afternoon	2018_07_24	3	13:26:49:17	13:26:50:16	Standing		Head up	Ears asymmetrical	Eyes open	Tail in motion
PASTURE	1	1	afternoon	2018_07_24	3	13:26:50:17	13:26:51:16	Standing		Head up	Ears asymmetrical	Eyes open	Tail in motion
PASTURE	1	1	afternoon	2018_07_24	3	13:26:51:17	13:26:52:16	Standing		Head up	Ears asymmetrical	Eyes open	Tail in motion
PASTURE	1	1	afternoon	2018_07_24	3	13:26:52:17	13:26:53:16	Standing		Head up	Ears asymmetrical	Eyes open	Tail in motion
PASTURE	1	1	afternoon	2018_07_24	3	13:26:53:17	13:26:54:16	Standing		Head up	Ears asymmetrical	Eyes open	Tail in motion
PASTURE	1	1	afternoon	2018_07_24	3	13:26:54:17	13:26:55:16	Standing		Head up	Ears asymmetrical	Eyes open	Tail in motion
PASTURE	1	1	afternoon	2018_07_24	3	13:26:55:17	13:26:56:16	Standing		Head up	Ears asymmetrical	Eyes open	Tail in motion
PASTURE	1	1	afternoon	2018_07_24	3	13:26:56:17	13:26:57:16	Standing		Head up	Ears asymmetrical	Eyes open	Tail in motion
PASTURE	1	1	afternoon	2018_07_24	3	13:26:57:17	13:26:58:16	Standing		Head up	Ears forwards	Eyes open	Tail in motion
PASTURE	1	1	afternoon	2018_07_24	3	13:26:58:17	13:26:59:16	Standing		Head up	Ears forwards	Eyes open	Tail in motion
PASTURE	1	1	afternoon	2018_07_24	3	13:26:59:17	13:27:00:16	Standing		Head up	Ears forwards	Eyes open	Tail in motion
PASTURE	1	1	afternoon	2018_07_24	3	13:27:00:17	13:27:01:16	Standing		Head up	Ears forwards	Eyes open	Tail in motion
PASTURE	1	1	afternoon	2018_07_24	3	13:27:01:17	13:27:02:16	Standing		Head up	Ears forwards	Eyes open	Tail in motion
PASTURE	1	1	afternoon	2018_07_24	3	13:27:02:17	13:27:03:16	Standing		Head up	Ears forwards	Eyes open	Tail in motion
PASTURE	1	1	afternoon	2018_07_24	3	13:27:03:17	13:27:04:16	Standing		Head up	Ears forwards	Eyes open	Tail in motion
PASTURE	1	1	afternoon	2018_07_24	3	13:27:04:17	13:27:05:16	Standing		Head up	Ears forwards	Eyes open	Tail in motion
PASTURE	1	1	afternoon	2018_07_24	3	13:27:05:17	13:27:06:16	Standing		Head up	Ears forwards	Eyes open	Tail in motion
PASTURE	1	1	afternoon	2018_07_24	3	13:27:06:17	13:27:07:16	Standing		Head up	Ears forwards	Eyes open	Tail in motion
PASTURE	1	1	afternoon	2018_07_24	3	13:27:07:17	13:27:08:16	Standing		Head up	Ears forwards	Eyes open	Tail in motion
PASTURE	1	1	afternoon	2018_07_24	3	13:27:08:17	13:27:09:16	Standing		Head up	Ears forwards	Eyes open	Tail in motion
PASTURE	1	1	afternoon	2018_07_24	3	13:27:09:17	13:27:10:16	Standing		Head up	Ears forwards	Eyes open	Tail in motion
PASTURE	1	1	afternoon	2018_07_24	3	13:27:10:17	13:27:11:16	Standing		Head up	Ears forwards	Eyes open	Tail in motion
PASTURE	1	1	afternoon	2018_07_24	3	13:27:11:17	13:27:12:16	Standing		Head up	Ears forwards	Eyes open	Tail in motion
PASTURE	1	1	afternoon	2018_07_24	3	13:27:12:17	13:27:13:16	Standing		Head up	Ears asymmetrical	Eyes open	Tail in motion
PASTURE	1	1	afternoon	2018_07_24	3	13:27:13:17	13:27:14:16	Standing		Head up	Ears asymmetrical	Eyes open	Tail in motion
PASTURE	1	1	afternoon	2018_07_24	3	13:27:14:17	13:27:15:16	Standing		Head up	Ears asymmetrical	Eyes open	Tail in motion
PASTURE	1	1	afternoon	2018_07_24	3	13:27:15:17	13:27:16:16	Standing		Head up	Ears asymmetrical	Eyes open	Tail in motion
PASTURE	1	1	afternoon	2018_07_24	3	13:27:16:17	13:27:17:16	Standing		Head up	Ears asymmetrical	Eyes open	Tail in motion
PASTURE	1	1	afternoon	2018_07_24	3	13:27:17:17	13:27:18:16	Standing		Head up	Ears asymmetrical	Eyes open	Tail in motion
PASTURE	1	1	afternoon	2018_07_24	3	13:27:18:17	13:27:19:16	Standing		Head up	Ears asymmetrical	Eyes open	Tail in motion
PASTURE	1	1	afternoon	2018_07_24	3	13:27:19:17	13:27:20:16	Standing		Head up	Ears asymmetrical	Eyes open	Tail in motion
PASTURE	1	1	afternoon	2018_07_24	3	13:27:20:17	13:27:21:16	Standing		Head up	Ears asymmetrical	Eyes open	Tail in motion
PASTURE	1	1	afternoon	2018_07_24	3	13:27:21:17	13:27:22:16	Standing		Head up	Ears asymmetrical	Eyes open	Tail in motion
PASTURE	1	1	afternoon	2018_07_24	3	13:27:22:17	13:27:23:16	Standing		Head up	Ears asymmetrical	Eyes open	Tail in motion
PASTURE	1	1	afternoon	2018_07_24	3	13:27:23:17	13:27:24:16	Standing		Head up	Ears asymmetrical	Eyes open	Tail in motion
PASTURE	1	1	afternoon	2018_07_24	3	13:27:24:17	13:27:25:16	Standing		Head up	Ears asymmetrical	Eyes open	Tail in motion
PASTURE	1	1	afternoon	2018_07_24	3	13:27:25:17	13:27:26:16	Standing		Head up	Ears asymmetrical	Eyes open	Tail in motion
PASTURE	1	1	afternoon	2018_07_24	3	13:27:26:17	13:27:27:16	Standing		Head up	Ears asymmetrical	Eyes open	Tail in motion
PASTURE	1	1	afternoon	2018_07_24	3	13:27:27:17	13:27:28:16	Standing		Head up	Ears asymmetrical	Eyes open	Tail in motion
PASTURE	1	1	afternoon	2018_07_24	3	13:27:28:17	13:27:29:16	Standing		Head up	Ears forwards	Eyes open	Tail in motion
PASTURE	1	1	afternoon	2018_07_24	3	13:27:29:17	13:27:30:16	Standing		Head up	Ears forwards	Eyes open	Tail in motion
PASTURE	1	1	afternoon	2018_07_24	3	13:27:30:17	13:27:31:16	Standing		Head up	Ears forwards	Eyes open	Tail in motion
PASTURE	1	1	afternoon	2018_07_24	3	13:27:31:17	13:27:32:16	Standing		Head up	Ears forwards	Eyes open	Tail in motion
PASTURE	1	1	afternoon	2018_07_24	3	13:27:32:17	13:27:33:16	Standing		Head up	Ears forwards	Eyes open	Tail in motion
PASTURE	1	1	afternoon	2018_07_24	3	13:27:33:17	13:27:34:16	Standing		Head up	Ears forwards	Eyes open	Tail in motion
PASTURE	1	1	afternoon	2018_07_24	3	13:27:34:17	13:27:35:16	Standing		Head up	Ears forwards	Eyes open	Tail in motion
PASTURE	1	1	afternoon	2018_07_24	3	13:27:35:17	13:27:36:16	Standing		Head up	Ears forwards	Eyes open	Tail in motion
PASTURE	1	1	afternoon	2018_07_24	3	13:27:36:17	13:27:37:16	Standing		Head up	Ears forwards	Eyes open	Tail in motion
PASTURE	1	1	afternoon	2018_07_24	3	13:27:37:17	13:27:38:16	Standing		Head up	Ears forwards	Eyes open	Tail in motion
PASTURE	1	1	afternoon	2018_07_24	3	13:27:38:17	13:27:39:16	Standing		Head up	Ears forwards	Eyes open	Tail in motion
PASTURE	1	1	afternoon	2018_07_24	3	13:27:39:17	13:27:40:16	Standing		Head up	Ears forwards	Eyes open	Tail in motion
PASTURE	1	1	afternoon	2018_07_24	3	13:27:40:17	13:27:41:16	Standing		Head up	Ears forwards	Eyes open	Tail in motion
PASTURE	1	1	afternoon	2018_07_24	3	13:27:41:17	13:27:42:16	Standing		Head up	Ears forwards	Eyes open	Tail in motion
PASTURE	1	1	afternoon	2018_07_24	3	13:27:42:17	13:27:43:16	Standing		Head up	Ears forwards	Eyes open	Tail in motion
PASTURE	1	1	afternoon	2018_07_24	3	13:27:43:17	13:27:44:16	Standing		Head up	Ears forwards	Eyes open	Tail in motion
PASTURE	1	1	afternoon	2018_07_24	3	13:27:44:17	13:27:45:16	Standing		Head up	Ears forwards	Eyes open	Tail in motion
PASTURE	1	1	afternoon	2018_07_24	3	13:27:45:17	13:27:46:16	Standing		Head up	Ears forwards	Eyes open	Tail in motion
PASTURE	1	1	afternoon	2018_07_24	3	13:27:46:17	13:27:47:16	Standing		Head up	Ears forwards	Eyes open	Tail in motion
PASTURE	1	1	afternoon	2018_07_24	3	13:27:47:17	13:27:48:16	Standing		Head up	Ears forwards	Eyes open	Tail in motion
PASTURE	1	1	afternoon	2018_07_24	3	13:27:48:17	13:27:49:16	Standing		Head up	Ears forwards	Eyes open	Tail in motion
PASTURE	1	1	afternoon	2018_07_24	3	13:27:49:17	13:27:50:16	Standing		Head up	Ears forwards	Eyes open	Tail in motion
PASTURE	1	1	afternoon	2018_07_24	3	13:27:50:17	13:27:51:16	Standing		Head up	Ears forwards	Eyes open	Tail in motion
PASTURE	1	1	afternoon	2018_07_24	3	13:27:51:17	13:27:52:16	Standing		Head up	Ears forwards	Eyes open	Tail in motion
PASTURE	1	1	afternoon	2018_07_24	3	13:27:52:17	13:27:53:16	Standing		Head up	Ears forwards	Eyes open	Tail in motion
PASTURE	1	1	afternoon	2018_07_24	3	13:27:53:17	13:27:54:16	Standing		Head up	Ears forwards	Eyes open	Tail in motion
PASTURE	1	1	afternoon	2018_07_24	3	13:27:54:17	13:27:55:16	Standing		Head up	Ears forwards	Eyes open	Tail in motion
PASTURE	1	1	afternoon	2018_07_24	3	13:27:55:17	13:27:56:16	Standing		Head up	Ears forwards	Eyes open	Tail in motion
PASTURE	1	1	afternoon	2018_07_24	3	13:27:56:17	13:27:57:16	Standing		Head up	Ears forwards	Eyes open	Tail in motion
PASTURE	1	1	afternoon	2018_07_24	3	13:27:57:17	13:27:58:16	Standing		Head up	Ears forwards	Eyes open	Tail in motion
PASTURE	1	1	afternoon	2018_07_24	3	13:27:58:17	13:27:59:16	Standing		Head up	Ears forwards	Eyes open	Tail in motion
PASTURE	1	1	afternoon	2018_07_24	3	13:27:59:17	13:28:00:16	Standing		Head up	Ears forwards	Eyes open	Tail in motion
PASTURE	1	1	afternoon	2018_07_24	3	13:28:00:17	13:28:01:16	Standing		Head up	Ears forwards	Eyes open	Tail in motion
PASTURE	1	1	afternoon	2018_07_24	3	13:28:01:17	13:28:02:16	Standing		Head up	Ears forwards	Eyes open	Tail in motion
PASTURE	1	1	afternoon	2018_07_24	3	13:28:02:17	13:28:03:16	Standing		Head up	Ears forwards	Eyes open	Tail in motion
PASTURE	1	1	afternoon	2018_07_24	3	13:28:03:17	13:28:04:16	Standing		Head up	Ears forwards	Eyes open	Tail in motion
PASTURE	1	1	afternoon	2018_07_24	3	13:28:04:17	13:28:05:16	Standing		Head up	Ears forwards	Eyes open	Tail in motion
PASTURE	1	1	afternoon	2018_07_24	3	13:28:05:17	13:28:06:16	Standing		Head up	Ears forwards	Eyes open	Tail in motion
PASTURE	1	1	afternoon	2018_07_24	3	13:28:06:17	13:28:07:16	Standing		Head up	Ears forwards	Eyes open	Tail in motion
PASTURE	1	1	afternoon	2018_07_24	3	13:28:07:17	13:28:08:16	Standing		Head up	Ears forwards	Eyes open	Tail in motion
PASTURE	1	1	afternoon	2018_07_24	3	13:28:08:17	13:28:09:16	Standing		Head up	Ears forwards	Eyes open	Tail in motion
PASTURE	1	1	afternoon	2018_07_24	3	13:28:09:17	13:28:10:16	Standing		Head up	Ears forwards	Eyes open	Tail in motion
PASTURE	1	1	afternoon	2018_07_24	3	13:28:10:17	13:28:11:16	Standing		Head up	Ears forwards	Eyes open	Tail in motion
PASTURE	1	1	afternoon	2018_07_24	3	13:28:11:17	13:28:12:16	Standing		Head up	Ears forwards	Eyes open	Tail in motion
PASTURE	1	1	afternoon	2018_07_24	3	13:28:12:17	13:28:13:16	Standing		Head up	Ears forwards	Eyes open	Tail in motion
PASTURE	1	1	afternoon	2018_07_24	3	13:28:13:17	13:28:14:16	Standing		Head up	Ears forwards	Eyes open	Tail in motion
PASTURE	1	1	afternoon	2018_07_24	3	13:28:14:17	13:28:15:16	Standing		Head up	Ears forwards	Eyes open	Tail in motion
PASTURE	1	1	afternoon	2018_07_24	3	13:28:15:17	13:28:16:16	Standing		Head up	Ears forwards	Eyes open	Tail in motion
PASTURE	1	1	afternoon	2018_07_24	3	13:28:16:17	13:28:17:16	Standing		Head up	Ears forwards	Eyes open	Tail in motion
PASTURE	1	1	afternoon	2018_07_24	3	13:28:17:17	13:28:18:16	Standing		Head up	Ears forwards	Eyes open	Tail in motion
PASTURE	1	1	afternoon	2018_07_24	3	13:28:18:17	13:28:19:16	Standing		Head up	Ears forwards	Eyes open	Tail in motion
PASTURE	1	1	afternoon	2018_07_24	3	13:28:19:17	13:28:20:16	Standing		Head up	Ears forwards	Eyes open	Tail in motion
PASTURE	1	1	afternoon	2018_07_24	3	13:28:20:17	13:28:21:16	Standing		Head up	Ears forwards	Eyes open	Tail in motion
PASTURE	1	1	afternoon	2018_07_24	3	13:28:21:17	13:28:22:16	Standing		Head up	Ears forwards	Eyes open	Tail in motion
PASTURE	1	1	afternoon	2018_07_24	3	13:28:22:17	13:28:23:16	Standing		Head up	Ears forwards	Eyes open	Tail in motion
PASTURE	1	1	afternoon	2018_07_24	3	13:28:23:17	13:28:24:16	Standing		Head up	Ears forwards	Eyes open	Tail in motion
PASTURE	1	1	afternoon	2018_07_24	3	13:28:24:17	13:28:25:16	Standing		Head up	Ears forwards	Eyes open	Tail in motion
PASTURE	1	1	afternoon	2018_07_24	3	13:28:25:17	13:28:26:16	Standing		Head up	Ears forwards	Eyes open	Tail in motion
PASTURE	1	1	afternoon	2018_07_24	3	13:28:26:17	13:28:27:16	Standing		Head up	Ears forwards	Eyes open	Tail in motion
PASTURE	1	1	afternoon	2018_07_24	3	13:28:27:17	13:28:28:16	Standing		Head up	Ears forwards	Eyes open	Tail in motion
PASTURE	1	1	afternoon	2018_07_24	3	13:28:28:17	13:28:29:16	Standing		Head up	Ears forwards	Eyes open	Tail in motion
PASTURE	1	1	afternoon	2018_07_24	3	13:28:29:17	13:28:30:16	Standing		Head up	Ears forwards	Eyes open	Tail in motion
PASTURE	1	1	afternoon	2018_07_24	3	13:28:30:17	13:28:31:16	Standing		Head up	Ears forwards	Eyes open	Tail in motion
PASTURE	1	1	afternoon	2018_07_24	3	13:28:31:17	13:28:32:16	Standing		Head up	Ears forwards	Eyes open	Tail in motion
PASTURE	1	1	afternoon	2018_07_24	3	13:28:32:17	13:28:33:16	Standing		Head up	Ears forwards	Eyes open	Tail in motion
PASTURE	1	1	afternoon	2018_07_24	3	13:28:33:17	13:28:34:16	Standing		Head up	Ears backwards	Eyes open	Tail in motion
PASTURE	1	1	afternoon	2018_07_24	3	13:28:34:17	13:28:35:16	Standing		Head up	Ears backwards	Eyes open	Tail in motion
PASTURE	1	1	afternoon	2018_07_24	3	13:28:35:17	13:28:36:16	Standing		Head up	Ears backwards	Eyes open	Tail in motion
PASTURE	1	1	afternoon	2018_07_24	3	13:28:36:17	13:28:37:16	Standing		Head up	Ears backwards	Eyes open	Tail in motion
PASTURE	1	1	afternoon	2018_07_24	3	13:28:37:17	13:28:38:16	Standing		Head up	Ears backwards	Eyes open	Tail in motion
PASTURE	1	1	afternoon	2018_07_24	3	13:28:38:17	13:28:39:16	Standing		Head up	Ears backwards	Eyes open	Tail in motion
PASTURE	1	1	afternoon	2018_07_24	3	13:28:39:17	13:28:40:16	Standing		Head up	Ears backwards	Eyes open	Tail in motion
PASTURE	1	1	afternoon	2018_07_24	3	13:28:40:17	13:28:41:16	Standing		Head up	Ears backwards	Eyes open	Tail in motion
PASTURE	1	1	afternoon	2018_07_24	3	13:28:41:17	13:28:42:16	Standing		Head up	Ears backwards	Eyes open	Tail in motion
PASTURE	1	1	afternoon	2018_07_24	3	13:28:42:17	13:28:43:16	Standing		Head up	Ears backwards	Eyes open	Tail in motion
PASTURE	1	1	afternoon	2018_07_24	3	13:28:43:17	13:28:44:16	Standing		Head up	Ears backwards	Eyes open	Tail in motion
PASTURE	1	1	afternoon	2018_07_24	3	13:28:44:17	13:28:45:16	Standing		Head up	Ears backwards	Eyes open	Tail in motion
PASTURE	1	1	afternoon	2018_07_24	3	13:28:45:17	13:28:46:16	Standing		Head up	Ears backwards	Eyes open	Tail in motion
PASTURE	1	1	afternoon	2018_07_24	3	13:28:46:17	13:28:47:16	Standing		Head up	Ears backwards	Eyes open	Tail in motion
PASTURE	1	1	afternoon	2018_07_24	3	13:28:47:17	13:28:48:16	Standing		Head up	Ears backwards	Eyes open	Tail in motion
PASTURE	1	1	afternoon	2018_07_24	3	13:28:48:17	13:28:49:16	Standing		Head up	Ears backwards	Eyes open	Tail in motion
PASTURE	1	1	afternoon	2018_07_24	3	13:28:49:17	13:28:50:16	Standing		Head up	Ears backwards	Eyes open	Tail in motion
PASTURE	1	1	afternoon	2018_07_24	3	13:28:50:17	13:28:51:16	Standing		Head up	Ears backwards	Eyes open	Tail in motion
PASTURE	1	1	afternoon	2018_07_24	3	13:28:51:17	13:28:52:16	Standing		Head up	Ears backwards	Eyes open	Tail in motion
PASTURE	1	1	afternoon	2018_07_24	3	13:28:52:17	13:28:53:16	Standing		Head up	Ears backwards	Eyes open	Tail in motion
PASTURE	1	1	afternoon	2018_07_24	3	13:28:53:17	13:28:54:16	Standing		Head up	Ears backwards	Eyes open	Tail in motion
PASTURE	1	1	afternoon	2018_07_24	3	13:28:54:17	13:28:55:16	Standing		Head up	Ears backwards	Eyes open	Tail in motion
PASTURE	1	1	afternoon	2018_07_24	3	13:28:55:17	13:28:56:16	Standing		Head up	Ears backwards	Eyes open	Tail in motion
PASTURE	1	1	afternoon	2018_07_24	3	13:28:56:17	13:28:57:16	Standing		Head up	Ears backwards	Eyes open	Tail in motion
PASTURE	1	1	afternoon	2018_07_24	3	13:28:57:17	13:28:58:16	Standing		Head up	Ears backwards	Eyes open	Tail in motion
PASTURE	1	1	afternoon	2018_07_24	3	13:28:58:17	13:28:59:16	Standing		Head up	Ears backwards	Eyes open	Tail in motion
PASTURE	1	1	afternoon	2018_07_24	3	13:28:59:17	13:29:00:16	Standing		Head up	Ears backwards	Eyes open	Tail in motion
PASTURE	1	1	afternoon	2018_07_24	3	13:29:00:17	13:29:01:16	Standing		Head up	Ears backwards	Eyes open	Tail in motion
PASTURE	1	1	afternoon	2018_07_24	3	13:29:01:17	13:29:02:16	Standing		Head up	Ears backwards	Eyes open	Tail in motion
PASTURE	1	1	afternoon	2018_07_24	3	13:29:02:17	13:29:03:16	Standing		Head up	Ears backwards	Eyes open	Tail in motion
PASTURE	1	1	afternoon	2018_07_24	3	13:29:03:17	13:29:04:16	Standing		Head up	Ears backwards	Eyes open	Tail in motion
PASTURE	1	1	afternoon	2018_07_24	3	13:29:04:17	13:29:05:16	Standing		Head up	Ears backwards	Eyes open	Tail in motion
PASTURE	1	1	afternoon	2018_07_24	3	13:29:05:17	13:29:06:16	Standing		Head up	Ears backwards	Eyes open	Tail in motion
PASTURE	1	1	afternoon	2018_07_24	3	13:29:06:17	13:29:07:16	Standing		Head up	Ears backwards	Eyes open	Tail in motion
PASTURE	1	1	afternoon	2018_07_24	3	13:29:07:17	13:29:08:16	Standing		Head up	Ears backwards	Eyes open	Tail in motion
PASTURE	1	1	afternoon	2018_07_24	3	13:29:08:17	13:29:09:16	Standing		Head up	Ears backwards	Eyes open	Tail in motion
PASTURE	1	1	afternoon	2018_07_24	3	13:29:09:17	13:29:10:16	Standing		Head up	Ears backwards	Eyes open	Tail in motion
PASTURE	1	1	afternoon	2018_07_24	3	13:29:10:17	13:29:11:16	Standing		Head up	Ears backwards	Eyes open	Tail in motion
PASTURE	1	1	afternoon	2018_07_24	3	13:29:11:17	13:29:12:16	Standing		Head up	Ears backwards	Eyes open	Tail in motion
PASTURE	1	1	afternoon	2018_07_24	3	13:29:12:17	13:29:13:16	Standing		Head up	Ears backwards	Eyes open	Tail in motion
PASTURE	1	1	afternoon	2018_07_24	3	13:29:13:17	13:29:14:16	Standing		Head up	Ears backwards	Eyes open	Tail in motion
PASTURE	1	1	afternoon	2018_07_24	3	13:29:14:17	13:29:15:16	Standing		Head up	Ears backwards	Eyes open	Tail in motion
PASTURE	1	1	afternoon	2018_07_24	3	13:29:15:17	13:29:16:16	Standing		Head up	Ears backwards	Eyes open	Tail in motion
PASTURE	1	1	afternoon	2018_07_24	3	13:29:16:17	13:29:17:16	Standing		Head up	Ears backwards	Eyes open	Tail in motion
PASTURE	1	1	afternoon	2018_07_24	3	13:29:17:17	13:29:18:16	Standing		Head up	Ears backwards	Eyes open	Tail in motion
PASTURE	1	1	afternoon	2018_07_24	3	13:29:18:17	13:29:19:16	Standing		Head up	Ears backwards	Eyes open	Tail in motion
PASTURE	1	1	afternoon	2018_07_24	3	13:29:19:17	13:29:20:16	Standing		Head up	Ears backwards	Eyes open	Tail in motion
PASTURE	1	1	afternoon	2018_07_24	3	13:29:20:17	13:29:21:16	Standing		Head up	Ears backwards	Eyes open	Tail in motion
PASTURE	1	1	afternoon	2018_07_24	3	13:29:21:17	13:29:22:16	Standing		Head up	Ears backwards	Eyes open	Tail in motion
PASTURE	1	1	afternoon	2018_07_24	3	13:29:22:17	13:29:23:16	Standing		Head up	Ears backwards	Eyes open	Tail in motion
PASTURE	1	1	afternoon	2018_07_24	3	13:29:23:17	13:29:24:16	Standing		Head up	Ears backwards	Eyes open	Tail in motion
PASTURE	1	1	afternoon	2018_07_24	3	13:29:24:17	13:29:25:16	Standing		Head up	Ears backwards	Eyes open	Tail in motion
PASTURE	1	1	afternoon	2018_07_24	3	13:29:25:17	13:29:26:16	Standing		Head up	Ears backwards	Eyes open	Tail in motion
PASTURE	1	1	afternoon	2018_07_24	3	13:29:26:17	13:29:27:16	Standing		Head up	Ears backwards	Eyes open	Tail in motion
PASTURE	1	1	afternoon	2018_07_24	3	13:29:27:17	13:29:28:16	Standing		Head up	Ears backwards	Eyes open	Tail in motion
PASTURE	1	1	afternoon	2018_07_24	3	13:29:28:17	13:29:29:16	Standing		Head up	Ears backwards	Eyes open	Tail in motion
PASTURE	1	1	afternoon	2018_07_24	3	13:29:29:17	13:29:30:16	Standing		Head up	Ears forwards	Eyes open	Tail in motion
PASTURE	1	1	afternoon	2018_07_24	3	13:29:30:17	13:29:31:16	Standing		Head up	Ears forwards	Eyes open	Tail in motion
PASTURE	1	1	afternoon	2018_07_24	3	13:29:31:17	13:29:32:16	Standing		Head up	Ears forwards	Eyes open	Tail in motion
PASTURE	1	1	afternoon	2018_07_24	3	13:29:32:17	13:29:33:16	Standing		Head up	Ears forwards	Eyes open	Tail in motion
PASTURE	1	1	afternoon	2018_07_24	3	13:29:33:17	13:29:34:16	Standing		Head up	Ears forwards	Eyes open	Tail in motion
PASTURE	1	1	afternoon	2018_07_24	3	13:29:34:17	13:29:35:16	Standing		Head up	Ears forwards	Eyes open	Tail in motion
PASTURE	1	1	afternoon	2018_07_24	3	13:29:35:17	13:29:36:16	Standing		Head up	Ears forwards	Eyes open	Tail in motion
PASTURE	1	1	afternoon	2018_07_24	3	13:29:36:17	13:29:37:16	Standing		Head up	Ears forwards	Eyes open	Tail in motion
PASTURE	1	1	afternoon	2018_07_24	3	13:29:37:17	13:29:38:16	Standing		Head up	Ears forwards	Eyes open	Tail in motion
PASTURE	1	1	afternoon	2018_07_24	3	13:29:38:17	13:29:39:16	Standing		Head up	Ears forwards	Eyes open	Tail in motion
PASTURE	1	1	afternoon	2018_07_24	3	13:29:39:17	13:29:40:16	Standing		Head up	Ears forwards	Eyes open	Tail in motion
PASTURE	1	1	afternoon	2018_07_24	3	13:29:40:17	13:29:41:16	Standing		Head up	Ears forwards	Eyes open	Tail in motion
PASTURE	1	1	afternoon	2018_07_24	3	13:29:41:17	13:29:42:16	Standing		Head up	Ears forwards	Eyes open	Tail in motion
PASTURE	1	1	afternoon	2018_07_24	3	13:29:42:17	13:29:43:16	Standing		Head up	Ears forwards	Eyes open	Tail in motion
PASTURE	1	1	afternoon	2018_07_24	3	13:29:43:17	13:29:44:16	Standing		Head up	Ears forwards	Eyes open	Tail in motion
PASTURE	1	1	afternoon	2018_07_24	3	13:29:44:17	13:29:45:16	Standing		Head up	Ears forwards	Eyes open	Tail in motion
PASTURE	1	1	afternoon	2018_07_24	3	13:29:45:17	13:29:46:16	Standing		Head up	Ears forwards	Eyes open	Tail in motion
PASTURE	1	1	afternoon	2018_07_24	3	13:29:46:17	13:29:47:16	Standing		Head up	Ears forwards	Eyes open	Tail in motion
PASTURE	1	1	afternoon	2018_07_24	3	13:29:47:17	13:29:48:16	Standing		Head up	Ears forwards	Eyes open	Tail in motion
PASTURE	1	1	afternoon	2018_07_24	3	13:29:48:17	13:29:49:16	Standing		Head up	Ears forwards	Eyes open	Tail in motion
PASTURE	1	1	afternoon	2018_07_24	3	13:29:49:17	13:29:50:16	Standing		Head up	Ears forwards	Eyes open	Tail in motion
PASTURE	1	1	afternoon	2018_07_24	3	13:29:50:17	13:29:51:16	Standing		Head up	Ears forwards	Eyes open	Tail in motion
PASTURE	1	1	afternoon	2018_07_24	3	13:29:51:17	13:29:52:16	Standing		Head up	Ears forwards	Eyes open	Tail in motion
PASTURE	1	1	afternoon	2018_07_24	3	13:29:52:17	13:29:53:16	Standing		Head up	Ears forwards	Eyes open	Tail in motion
PASTURE	1	1	afternoon	2018_07_24	3	13:29:53:17	13:29:54:16	Standing		Head up	Ears forwards	Eyes open	Tail in motion
PASTURE	1	1	afternoon	2018_07_24	3	13:29:54:17	13:29:55:16	Standing		Head up	Ears forwards	Eyes open	Tail in motion
PASTURE	1	1	afternoon	2018_07_24	3	13:29:55:17	13:29:56:16	Standing		Head up	Ears forwards	Eyes open	Tail in motion
PASTURE	1	1	afternoon	2018_07_24	3	13:29:56:17	13:29:57:16	Standing		Head up	Ears forwards	Eyes open	Tail in motion
PASTURE	1	1	afternoon	2018_07_24	3	13:29:57:17	13:29:58:16	Standing		Head up	Ears forwards	Eyes open	Tail in motion
PASTURE	1	1	afternoon	2018_07_24	3	13:29:58:17	13:29:59:16	Standing		Head up	Ears forwards	Eyes open	Tail in motion
PASTURE	1	1	afternoon	2018_07_24	3	13:29:59:17	13:30:00:16	Standing		Head up	Ears forwards	Eyes open	Tail in motion
PASTURE	1	1	afternoon	2018_07_24	3	13:30:00:17	13:30:01:16	Standing		Head up	Ears forwards	Eyes open	Tail in motion
PASTURE	1	1	afternoon	2018_07_24	3	13:30:01:17	13:30:02:16	Standing		Head up	Ears forwards	Eyes open	Tail in motion
PASTURE	1	1	afternoon	2018_07_24	4	13:32:14:17	13:32:15:16	Standing		Head up	Ears forwards	Eyes open	Tail hanging
PASTURE	1	1	afternoon	2018_07_24	4	13:32:15:17	13:32:16:16	Standing		Head up	Ears forwards	Eyes open	Tail hanging
PASTURE	1	1	afternoon	2018_07_24	4	13:32:16:17	13:32:17:16	Standing		Head up	Ears forwards	Eyes open	Tail hanging
PASTURE	1	1	afternoon	2018_07_24	4	13:32:17:17	13:32:18:16	Standing		Head up	Ears forwards	Eyes open	Tail hanging
PASTURE	1	1	afternoon	2018_07_24	4	13:32:18:17	13:32:19:16	Standing		Head up	Ears forwards	Eyes open	Tail hanging
PASTURE	1	1	afternoon	2018_07_24	4	13:32:19:17	13:32:20:16	Standing		Head up	Ears forwards	Eyes open	Tail hanging
PASTURE	1	1	afternoon	2018_07_24	4	13:32:20:17	13:32:21:16	Standing		Head up	Ears forwards	Eyes open	Tail hanging
PASTURE	1	1	afternoon	2018_07_24	4	13:32:21:17	13:32:22:16	Standing		Head up	Ears forwards	Eyes open	Tail hanging
PASTURE	1	1	afternoon	2018_07_24	4	13:32:22:17	13:32:23:16	Standing		Head up	Ears forwards	Eyes open	Tail hanging
PASTURE	1	1	afternoon	2018_07_24	4	13:32:23:17	13:32:24:16	Standing		Head up	Ears forwards	Eyes open	Tail hanging
PASTURE	1	1	afternoon	2018_07_24	4	13:32:24:17	13:32:25:16	Standing		Head up	Ears forwards	Eyes open	Tail hanging
PASTURE	1	1	afternoon	2018_07_24	4	13:32:25:17	13:32:26:16	Standing		Head up	Ears forwards	Eyes open	Tail in motion
PASTURE	1	1	afternoon	2018_07_24	4	13:32:26:17	13:32:27:16	Standing		Head up	Ears forwards	Eyes open	Tail in motion
PASTURE	1	1	afternoon	2018_07_24	4	13:32:27:17	13:32:28:16	Standing		Head up	Ears forwards	Eyes open	Tail in motion
PASTURE	1	1	afternoon	2018_07_24	4	13:32:28:17	13:32:29:16	Standing		Head up	Ears forwards	Eyes open	Tail in motion
PASTURE	1	1	afternoon	2018_07_24	4	13:32:29:17	13:32:30:16	Standing		Head up	Ears forwards	Eyes open	Tail in motion
PASTURE	1	1	afternoon	2018_07_24	4	13:32:30:17	13:32:31:16	Standing		Head up	Ears forwards	Eyes open	Tail in motion
PASTURE	1	1	afternoon	2018_07_24	4	13:32:31:17	13:32:32:16	Standing		Head up	Ears forwards	Eyes open	Tail in motion
PASTURE	1	1	afternoon	2018_07_24	4	13:32:32:17	13:32:33:16	Standing		Head up	Ears forwards	Eyes open	Tail in motion
PASTURE	1	1	afternoon	2018_07_24	4	13:32:33:17	13:32:34:16	Standing		Head up	Ears forwards	Eyes open	Tail in motion
PASTURE	1	1	afternoon	2018_07_24	4	13:32:34:17	13:32:35:16	Standing		Head up	Ears forwards	Eyes open	Tail in motion
PASTURE	1	1	afternoon	2018_07_24	4	13:32:35:17	13:32:36:16	Standing		Head up	Ears forwards	Eyes open	Tail in motion
PASTURE	1	1	afternoon	2018_07_24	4	13:32:36:17	13:32:37:16	Standing		Head up	Ears forwards	Eyes open	Tail in motion
PASTURE	1	1	afternoon	2018_07_24	4	13:32:37:17	13:32:38:16	Standing		Head up	Ears forwards	Eyes open	Tail in motion
PASTURE	1	1	afternoon	2018_07_24	4	13:32:38:17	13:32:39:16	Standing		Head up	Ears forwards	Eyes open	Tail in motion
PASTURE	1	1	afternoon	2018_07_24	4	13:32:39:17	13:32:40:16	Standing		Head up	Ears forwards	Eyes open	Tail in motion
PASTURE	1	1	afternoon	2018_07_24	4	13:32:40:17	13:32:41:16	Standing		Head up	Ears forwards	Eyes open	Tail in motion
PASTURE	1	1	afternoon	2018_07_24	4	13:32:41:17	13:32:42:16	Standing		Head up	Ears forwards	Eyes open	Tail in motion
PASTURE	1	1	afternoon	2018_07_24	4	13:32:42:17	13:32:43:16	Standing		Head up	Ears forwards	Eyes open	Tail in motion
PASTURE	1	1	afternoon	2018_07_24	4	13:32:43:17	13:32:44:16	Standing		Head up	Ears forwards	Eyes open	Tail in motion
PASTURE	1	1	afternoon	2018_07_24	4	13:32:44:17	13:32:45:16	Standing		Head up	Ears forwards	Eyes open	Tail in motion
PASTURE	1	1	afternoon	2018_07_24	4	13:32:45:17	13:32:46:16	Standing		Head up	Ears forwards	Eyes open	Tail in motion
PASTURE	1	1	afternoon	2018_07_24	4	13:32:46:17	13:32:47:16	Standing		Head up	Ears forwards	Eyes open	Tail in motion
PASTURE	1	1	afternoon	2018_07_24	4	13:32:47:17	13:32:48:16	Standing		Head up	Ears forwards	Eyes open	Tail in motion
PASTURE	1	1	afternoon	2018_07_24	4	13:32:48:17	13:32:49:16	Standing		Head up	Ears forwards	Eyes open	Tail in motion
PASTURE	1	1	afternoon	2018_07_24	4	13:32:49:17	13:32:50:16	Standing		Head up	Ears forwards	Eyes open	Tail in motion
PASTURE	1	1	afternoon	2018_07_24	4	13:32:50:17	13:32:51:16	Standing		Head up	Ears forwards	Eyes open	Tail in motion
PASTURE	1	1	afternoon	2018_07_24	4	13:32:51:17	13:32:52:16	Standing		Head up	Ears forwards	Eyes open	Tail in motion
PASTURE	1	1	afternoon	2018_07_24	4	13:32:52:17	13:32:53:16	Standing		Head up	Ears forwards	Eyes open	Tail in motion
PASTURE	1	1	afternoon	2018_07_24	4	13:32:53:17	13:32:54:16	Standing		Head up	Ears forwards	Eyes open	Tail in motion
PASTURE	1	1	afternoon	2018_07_24	4	13:32:54:17	13:32:55:16	Standing		Head up	Ears forwards	Eyes open	Tail in motion
PASTURE	1	1	afternoon	2018_07_24	4	13:32:55:17	13:32:56:16	Standing		Head up	Ears forwards	Eyes open	Tail in motion
PASTURE	1	1	afternoon	2018_07_24	4	13:32:56:17	13:32:57:16	Standing		Head up	Ears forwards	Eyes open	Tail in motion
PASTURE	1	1	afternoon	2018_07_24	4	13:32:57:17	13:32:58:16	Standing		Head up	Ears forwards	Eyes open	Tail in motion
PASTURE	1	1	afternoon	2018_07_24	4	13:32:58:17	13:32:59:16	Standing		Head up	Ears forwards	Eyes open	Tail in motion
PASTURE	1	1	afternoon	2018_07_24	4	13:32:59:17	13:33:00:16	Standing		Head up	Ears forwards	Eyes open	Tail in motion
PASTURE	1	1	afternoon	2018_07_24	4	13:33:00:17	13:33:01:16	Standing		Head up	Ears forwards	Eyes open	Tail in motion
PASTURE	1	1	afternoon	2018_07_24	4	13:33:01:17	13:33:02:16	Standing		Head up	Ears forwards	Eyes open	Tail in motion
PASTURE	1	1	afternoon	2018_07_24	4	13:33:02:17	13:33:03:16	Standing		Head up	Ears forwards	Eyes open	Tail in motion
PASTURE	1	1	afternoon	2018_07_24	4	13:33:03:17	13:33:04:16	Standing		Head up	Ears forwards	Eyes open	Tail in motion
PASTURE	1	1	afternoon	2018_07_24	4	13:33:04:17	13:33:05:16	Standing		Head up	Ears forwards	Eyes open	Tail in motion
PASTURE	1	1	afternoon	2018_07_24	4	13:33:05:17	13:33:06:16	Standing		Head up	Ears forwards	Eyes open	Tail in motion
PASTURE	1	1	afternoon	2018_07_24	4	13:33:06:17	13:33:07:16	Standing		Head up	Ears forwards	Eyes open	Tail in motion
PASTURE	1	1	afternoon	2018_07_24	4	13:33:07:17	13:33:08:16	Standing		Head up	Ears forwards	Eyes open	Tail in motion
PASTURE	1	1	afternoon	2018_07_24	4	13:33:08:17	13:33:09:16	Standing		Head up	Ears forwards	Eyes open	Tail in motion
PASTURE	1	1	afternoon	2018_07_24	4	13:33:09:17	13:33:10:16	Standing		Head up	Ears forwards	Eyes open	Tail in motion
PASTURE	1	1	afternoon	2018_07_24	4	13:33:10:17	13:33:11:16	Standing		Head up	Ears forwards	Eyes open	Tail in motion
PASTURE	1	1	afternoon	2018_07_24	4	13:33:11:17	13:33:12:16	Standing		Head up	Ears forwards	Eyes open	Tail in motion
PASTURE	1	1	afternoon	2018_07_24	4	13:33:12:17	13:33:13:16	Standing		Head up	Ears forwards	Eyes open	Tail in motion
PASTURE	1	1	afternoon	2018_07_24	4	13:33:13:17	13:33:14:16	Standing		Head up	Ears forwards	Eyes open	Tail in motion
PASTURE	1	1	afternoon	2018_07_24	4	13:33:14:17	13:33:15:16	Standing		Head up	Ears forwards	Eyes open	Tail in motion
PASTURE	1	1	afternoon	2018_07_24	4	13:33:15:17	13:33:16:16	Standing		Head up	Ears forwards	Eyes open	Tail in motion
PASTURE	1	1	afternoon	2018_07_24	4	13:33:16:17	13:33:17:16	Standing		Head up	Ears forwards	Eyes open	Tail in motion
PASTURE	1	1	afternoon	2018_07_24	4	13:33:17:17	13:33:18:16	Standing		Head up	Ears forwards	Eyes open	Tail in motion
PASTURE	1	1	afternoon	2018_07_24	4	13:33:18:17	13:33:19:16	Standing		Head up	Ears forwards	Eyes open	Tail in motion
PASTURE	1	1	afternoon	2018_07_24	4	13:33:19:17	13:33:20:16	Standing		Head up	Ears forwards	Eyes open	Tail in motion
PASTURE	1	1	afternoon	2018_07_24	4	13:33:20:17	13:33:21:16	Standing		Head up	Ears forwards	Eyes open	Tail in motion
PASTURE	1	1	afternoon	2018_07_24	4	13:33:21:17	13:33:22:16	Standing		Head up	Ears forwards	Eyes open	Tail in motion
PASTURE	1	1	afternoon	2018_07_24	4	13:33:22:17	13:33:23:16	Standing		Head up	Ears forwards	Eyes open	Tail in motion
PASTURE	1	1	afternoon	2018_07_24	4	13:33:23:17	13:33:24:16	Standing		Head up	Ears forwards	Eyes open	Tail in motion
PASTURE	1	1	afternoon	2018_07_24	4	13:33:24:17	13:33:25:16	Standing		Head up	Ears forwards	Eyes open	Tail in motion
PASTURE	1	1	afternoon	2018_07_24	4	13:33:25:17	13:33:26:16	Standing		Head up	Ears forwards	Eyes open	Tail in motion
PASTURE	1	1	afternoon	2018_07_24	4	13:33:26:17	13:33:27:16	Standing		Head up	Ears forwards	Eyes open	Tail in motion
PASTURE	1	1	afternoon	2018_07_24	4	13:33:27:17	13:33:28:16	Standing		Head up	Ears forwards	Eyes open	Tail in motion
PASTURE	1	1	afternoon	2018_07_24	4	13:33:28:17	13:33:29:16	Standing		Head up	Ears forwards	Eyes open	Tail in motion
PASTURE	1	1	afternoon	2018_07_24	4	13:33:29:17	13:33:30:16	Standing		Head up	Ears forwards	Eyes open	Tail in motion
PASTURE	1	1	afternoon	2018_07_24	4	13:33:30:17	13:33:31:16	Standing		Head up	Ears forwards	Eyes open	Tail in motion
PASTURE	1	1	afternoon	2018_07_24	4	13:33:31:17	13:33:32:16	Standing		Head up	Ears forwards	Eyes open	Tail in motion
PASTURE	1	1	afternoon	2018_07_24	4	13:33:32:17	13:33:33:16	Standing		Head up	Ears forwards	Eyes open	Tail in motion
PASTURE	1	1	afternoon	2018_07_24	4	13:33:33:17	13:33:34:16	Standing		Head up	Ears forwards	Eyes open	Tail in motion
PASTURE	1	1	afternoon	2018_07_24	4	13:33:34:17	13:33:35:16	Standing		Head up	Ears forwards	Eyes open	Tail in motion
PASTURE	1	1	afternoon	2018_07_24	4	13:33:35:17	13:33:36:16	Standing		Head up	Ears forwards	Eyes open	Tail in motion
PASTURE	1	1	afternoon	2018_07_24	4	13:33:36:17	13:33:37:16	Standing		Head up	Ears forwards	Eyes open	Tail in motion
PASTURE	1	1	afternoon	2018_07_24	4	13:33:37:17	13:33:38:16	Standing		Head up	Ears forwards	Eyes open	Tail in motion
PASTURE	1	1	afternoon	2018_07_24	4	13:33:38:17	13:33:39:16	Standing		Head up	Ears forwards	Eyes open	Tail in motion
PASTURE	1	1	afternoon	2018_07_24	4	13:33:39:17	13:33:40:16	Standing		Head up	Ears forwards	Eyes open	Tail in motion
PASTURE	1	1	afternoon	2018_07_24	4	13:33:40:17	13:33:41:16	Standing		Head up	Ears forwards	Eyes open	Tail in motion
PASTURE	1	1	afternoon	2018_07_24	4	13:33:41:17	13:33:42:16	Standing		Head up	Ears forwards	Eyes open	Tail in motion
PASTURE	1	1	afternoon	2018_07_24	4	13:33:42:17	13:33:43:16	Standing		Head up	Ears forwards	Eyes open	Tail in motion
PASTURE	1	1	afternoon	2018_07_24	4	13:33:43:17	13:33:44:16	Standing		Head up	Ears forwards	Eyes open	Tail in motion
PASTURE	1	1	afternoon	2018_07_24	4	13:33:44:17	13:33:45:16	Standing		Head up	Ears forwards	Eyes open	Tail in motion
PASTURE	1	1	afternoon	2018_07_24	4	13:33:45:17	13:33:46:16	Standing		Head up	Ears forwards	Eyes open	Tail in motion
PASTURE	1	1	afternoon	2018_07_24	4	13:33:46:17	13:33:47:16	Standing		Head up	Ears forwards	Eyes open	Tail in motion
PASTURE	1	1	afternoon	2018_07_24	4	13:33:47:17	13:33:48:16	Standing		Head down	Ears forwards	Eyes open	Tail in motion
PASTURE	1	1	afternoon	2018_07_24	4	13:33:48:17	13:33:49:16	Standing		Head down	Ears forwards	Eyes open	Tail in motion
PASTURE	1	1	afternoon	2018_07_24	4	13:33:49:17	13:33:50:16	Standing		Head down	Ears forwards	Eyes open	Tail in motion
PASTURE	1	1	afternoon	2018_07_24	4	13:33:50:17	13:33:51:16	Standing		Head down	Ears forwards	Eyes open	Tail in motion
PASTURE	1	1	afternoon	2018_07_24	4	13:33:51:17	13:33:52:16	Standing		Head down	Ears forwards	Eyes open	Tail in motion
PASTURE	1	1	afternoon	2018_07_24	4	13:33:52:17	13:33:53:16	Standing		Head down	Ears forwards	Eyes open	Tail in motion
PASTURE	1	1	afternoon	2018_07_24	4	13:33:53:17	13:33:54:16	Standing		Head down	Ears forwards	Eyes open	Tail in motion
PASTURE	1	1	afternoon	2018_07_24	4	13:33:54:17	13:33:55:16	Standing		Head down	Ears forwards	Eyes open	Tail in motion
PASTURE	1	1	afternoon	2018_07_24	4	13:33:55:17	13:33:56:16	Standing		Head down	Ears forwards	Eyes open	Tail in motion
PASTURE	1	1	afternoon	2018_07_24	4	13:33:56:17	13:33:57:16	Standing		Head up	Ears forwards	Eyes open	Tail in motion
PASTURE	1	1	afternoon	2018_07_24	4	13:33:57:17	13:33:58:16	Standing		Head up	Ears forwards	Eyes open	Tail in motion
PASTURE	1	1	afternoon	2018_07_24	4	13:33:58:17	13:33:59:16	Standing		Head up	Ears forwards	Eyes open	Tail in motion
PASTURE	1	1	afternoon	2018_07_24	4	13:33:59:17	13:34:00:16	Standing		Head up	Ears forwards	Eyes open	Tail in motion
PASTURE	1	1	afternoon	2018_07_24	4	13:34:00:17	13:34:01:16	Standing		Head up	Ears forwards	Eyes open	Tail in motion
PASTURE	1	1	afternoon	2018_07_24	4	13:34:01:17	13:34:02:16	Standing		Head up	Ears forwards	Eyes open	Tail in motion
PASTURE	1	1	afternoon	2018_07_24	4	13:34:02:17	13:34:03:16	Standing		Head up	Ears forwards	Eyes open	Tail in motion
PASTURE	1	1	afternoon	2018_07_24	4	13:34:03:17	13:34:04:16	Standing		Head up	Ears forwards	Eyes open	Tail in motion
PASTURE	1	1	afternoon	2018_07_24	4	13:34:04:17	13:34:05:16	Standing		Head up	Ears forwards	Eyes open	Tail in motion
PASTURE	1	1	afternoon	2018_07_24	4	13:34:05:17	13:34:06:16	Standing		Head up	Ears forwards	Eyes open	Tail in motion
PASTURE	1	1	afternoon	2018_07_24	4	13:34:06:17	13:34:07:16	Standing		Head up	Ears forwards	Eyes open	Tail in motion
PASTURE	1	1	afternoon	2018_07_24	4	13:34:07:17	13:34:08:16	Standing		Head up	Ears forwards	Eyes open	Tail in motion
PASTURE	1	1	afternoon	2018_07_24	4	13:34:08:17	13:34:09:16	Standing		Head up	Ears forwards	Eyes open	Tail in motion
PASTURE	1	1	afternoon	2018_07_24	4	13:34:09:17	13:34:10:16	Standing		Head up	Ears forwards	Eyes open	Tail in motion
PASTURE	1	1	afternoon	2018_07_24	4	13:34:10:17	13:34:11:16	Standing		Head up	Ears forwards	Eyes open	Tail in motion
PASTURE	1	1	afternoon	2018_07_24	4	13:34:11:17	13:34:12:16	Standing		Head up	Ears forwards	Eyes open	Tail in motion
PASTURE	1	1	afternoon	2018_07_24	4	13:34:12:17	13:34:13:16	Standing		Head up	Ears forwards	Eyes open	Tail in motion
PASTURE	1	1	afternoon	2018_07_24	4	13:34:13:17	13:34:14:16	Standing		Head up	Ears forwards	Eyes open	Tail in motion
PASTURE	1	1	afternoon	2018_07_24	4	13:34:14:17	13:34:15:16	Standing		Head up	Ears forwards	Eyes open	Tail in motion
PASTURE	1	1	afternoon	2018_07_24	4	13:34:15:17	13:34:16:16	Standing		Head up	Ears forwards	Eyes open	Tail in motion
PASTURE	1	1	afternoon	2018_07_24	4	13:34:16:17	13:34:17:16	Standing		Head up	Ears forwards	Eyes open	Tail in motion
PASTURE	1	1	afternoon	2018_07_24	4	13:34:17:17	13:34:18:16	Standing		Head up	Ears forwards	Eyes open	Tail in motion
PASTURE	1	1	afternoon	2018_07_24	4	13:34:18:17	13:34:19:16	Standing		Head up	Ears forwards	Eyes open	Tail in motion
PASTURE	1	1	afternoon	2018_07_24	4	13:34:19:17	13:34:20:16	Standing		Head up	Ears forwards	Eyes open	Tail in motion
PASTURE	1	1	afternoon	2018_07_24	4	13:34:20:17	13:34:21:16	Standing		Head up	Ears forwards	Eyes open	Tail in motion
PASTURE	1	1	afternoon	2018_07_24	4	13:34:21:17	13:34:22:16	Standing		Head up	Ears forwards	Eyes open	Tail in motion
PASTURE	1	1	afternoon	2018_07_24	4	13:34:22:17	13:34:23:16	Standing		Head up	Ears forwards	Eyes open	Tail in motion
[truncated: 129,791 more rows]
